# Supplementary material for: Microbiome analysis and confocal microscopy of used kitchen sponges reveal massive colonization by Acinetobacter, Moraxella and Chryseobacterium species
Source: PubMed Central journal article supplement (PMC5517580; doi:10.1038/s41598-017-06055-9), 2017-07-19
Supplement: 41598_2017_6055_MOESM1_ESM.pdf [file 41598_2017_6055_MOESM1_ESM.pdf]

## Supplementary material for

# Microbiome analysis and confocal microscopy of used kitchen sponges reveal massive colonization by *Acinetobacter*, *Moraxella* and *Chryseobacterium* species

Massimiliano Cardinale, Dominik Kaiser, Tillmann Lueders, Sylvia Schnell &

Markus Egert

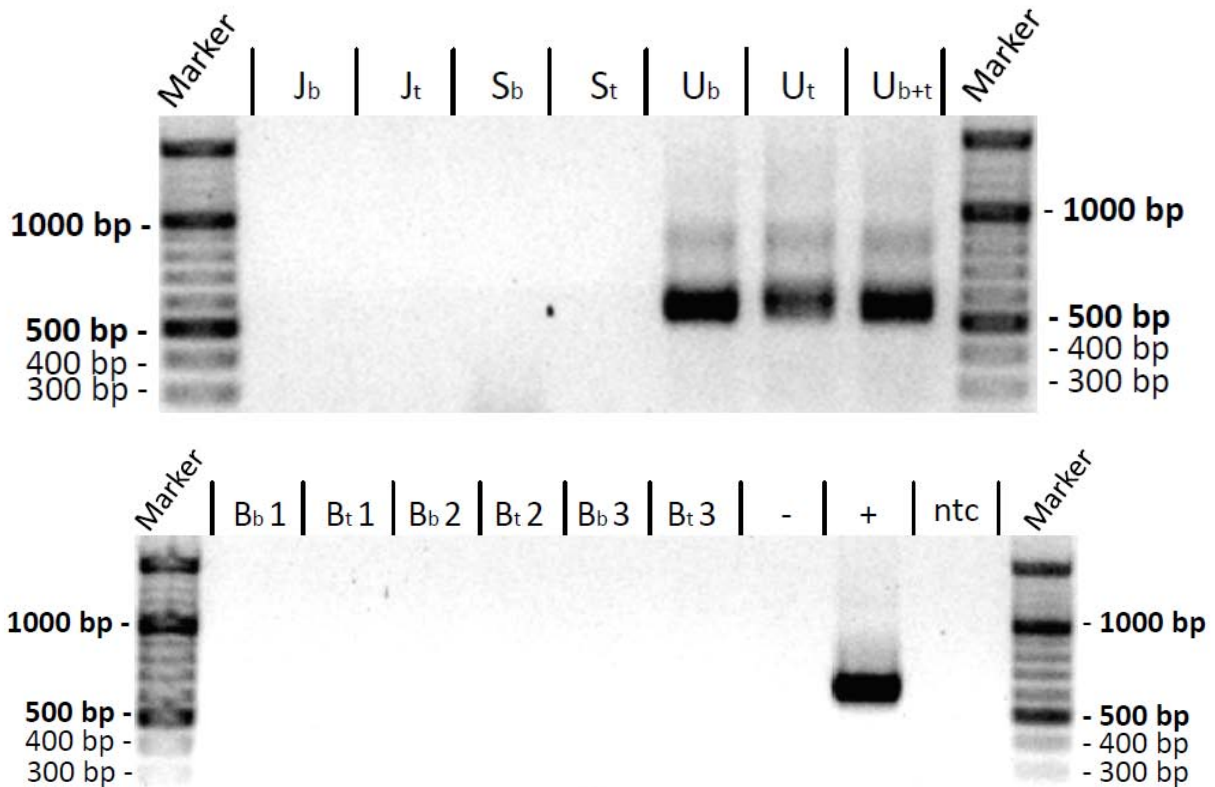

**Figure S1.** Results of a PCR assay targeting the 16S rRNA gene in DNA extracts from five newly bought kitchen sponges (J, S, B; t = top, b = bottom). All new sponges did not yield PCR signals, while a used sponge sample (U) clearly did. Also a DNA extract from a negative extraction (-) yielded no PCR product. *E. coli* DNA was used as a positive control. Ntc = no template control.

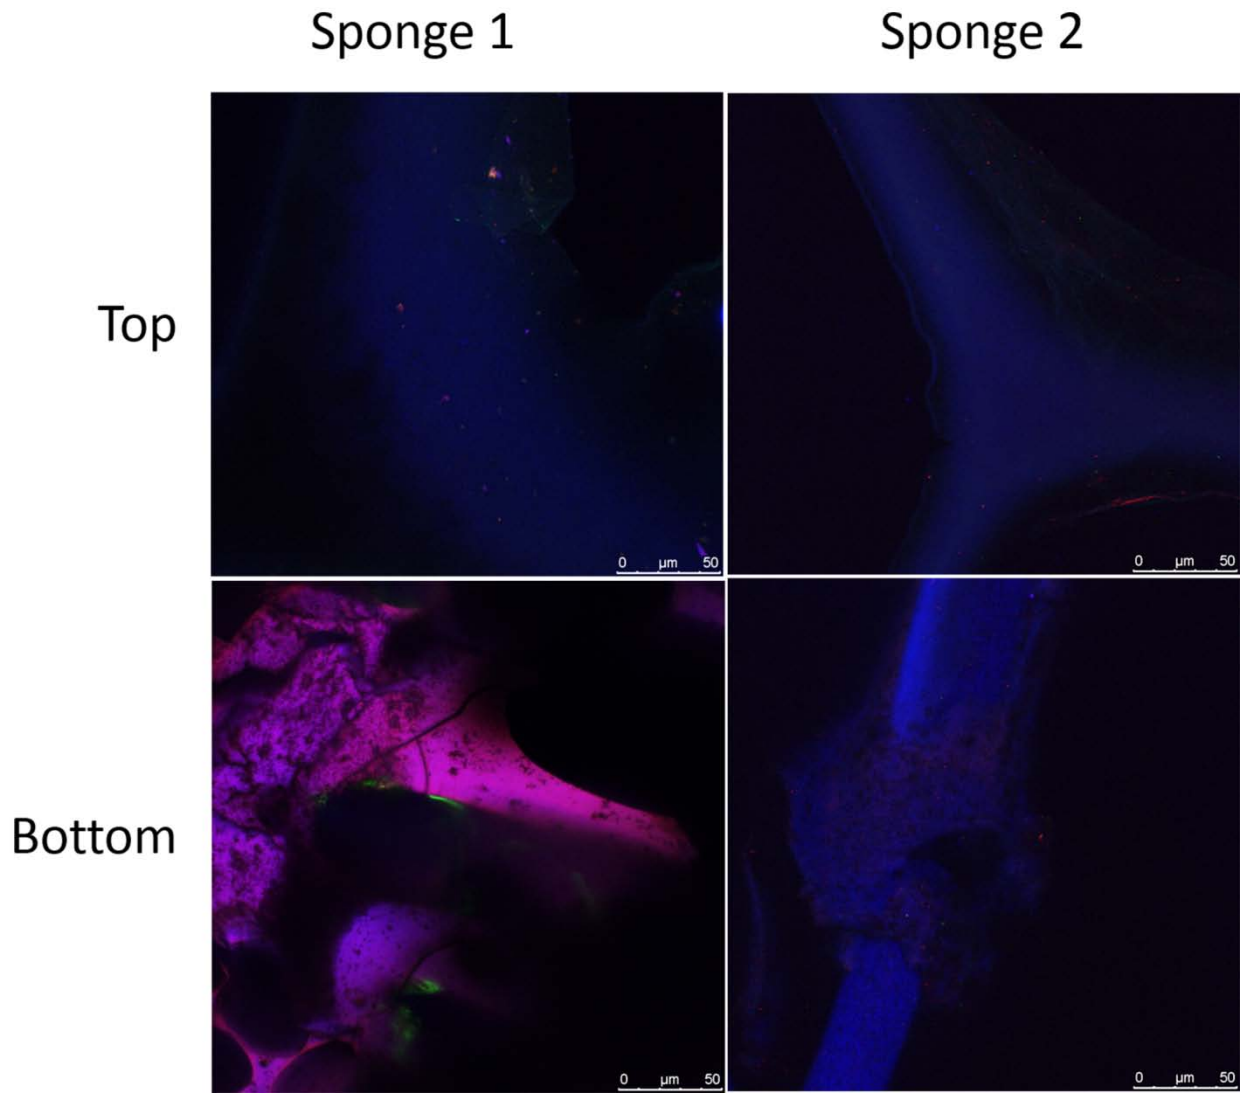

**Figure S2** FISH-CLSM analysis of new kitchen sponges using the universal bacterial probe EUB338MIX labeled with Cy3 (expected signal: red) and the Gammaproteobacteria-specific probe Gam42a labelled with Cy5 (expected signal: green); no bacterial signals were detected. Blue= sponge autofluorescence.

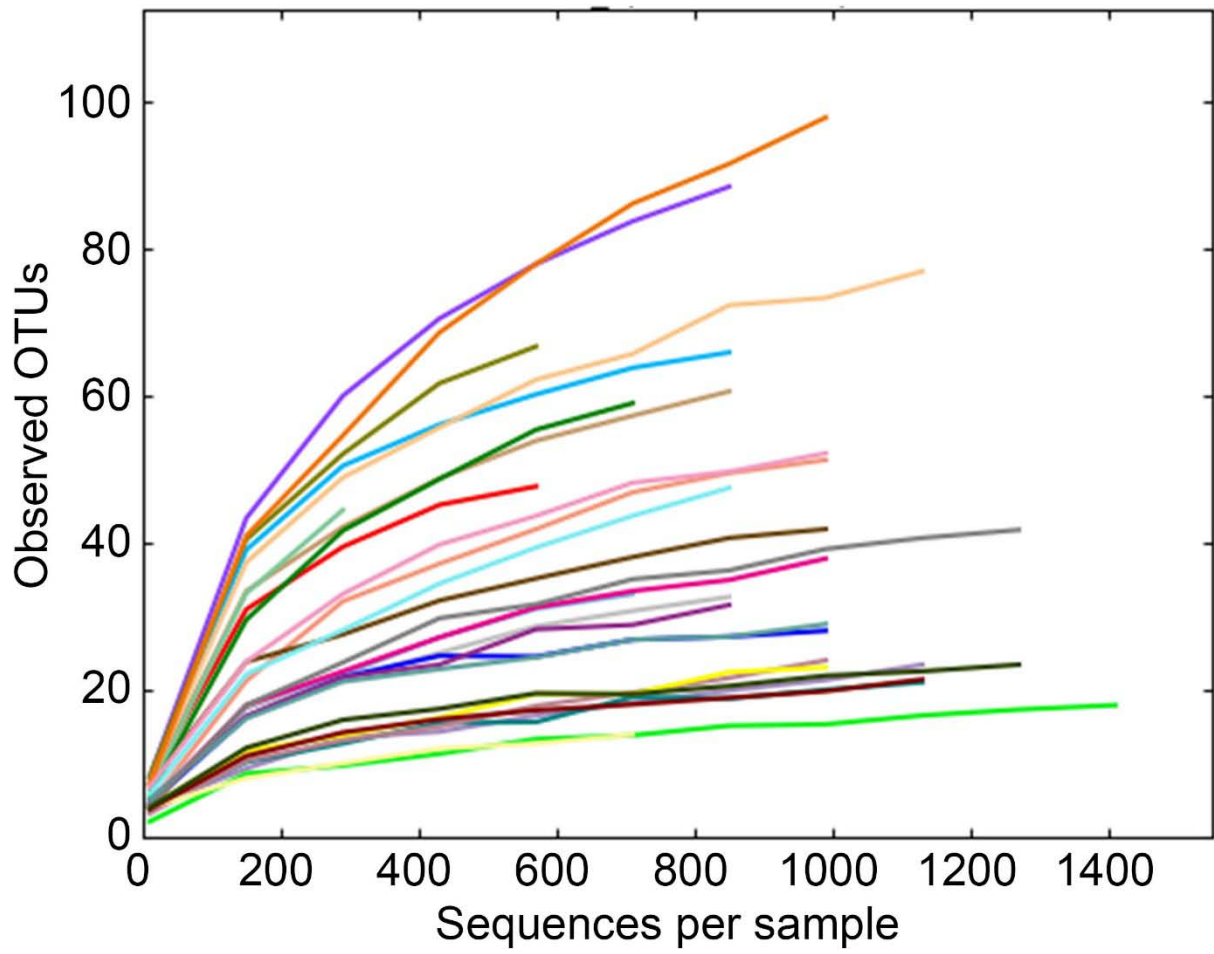

**Figure S3** Rarefaction curves of the 28 sponge samples analyzed by pyrosequencing of the 16S rRNA amplicon libraries

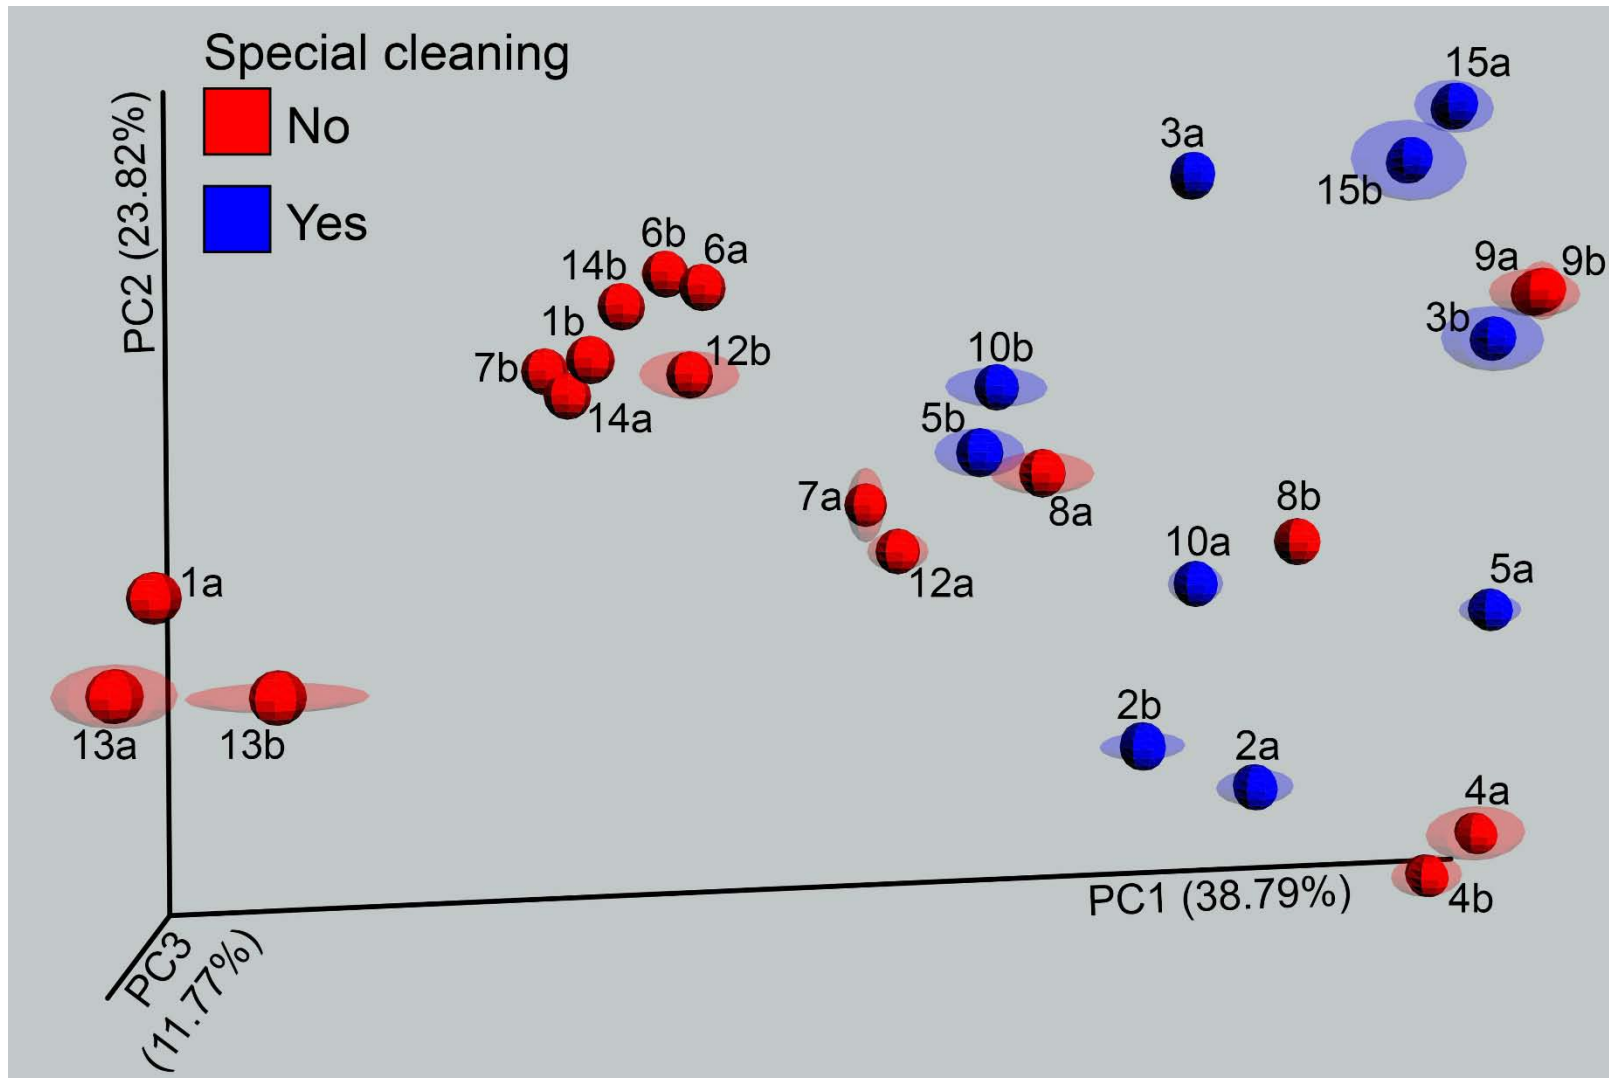

**Figure S4** Beta-diversity plot of jackknifed weighted-Unifrac distances between sponge samples, colored by “special cleaning”, the only significant factor found (ADONIS,  $p = 0.022$ ), and labeled by sample name (numbers indicate the individual sponges; letters indicate the sponge side, a= bottom, b= top)

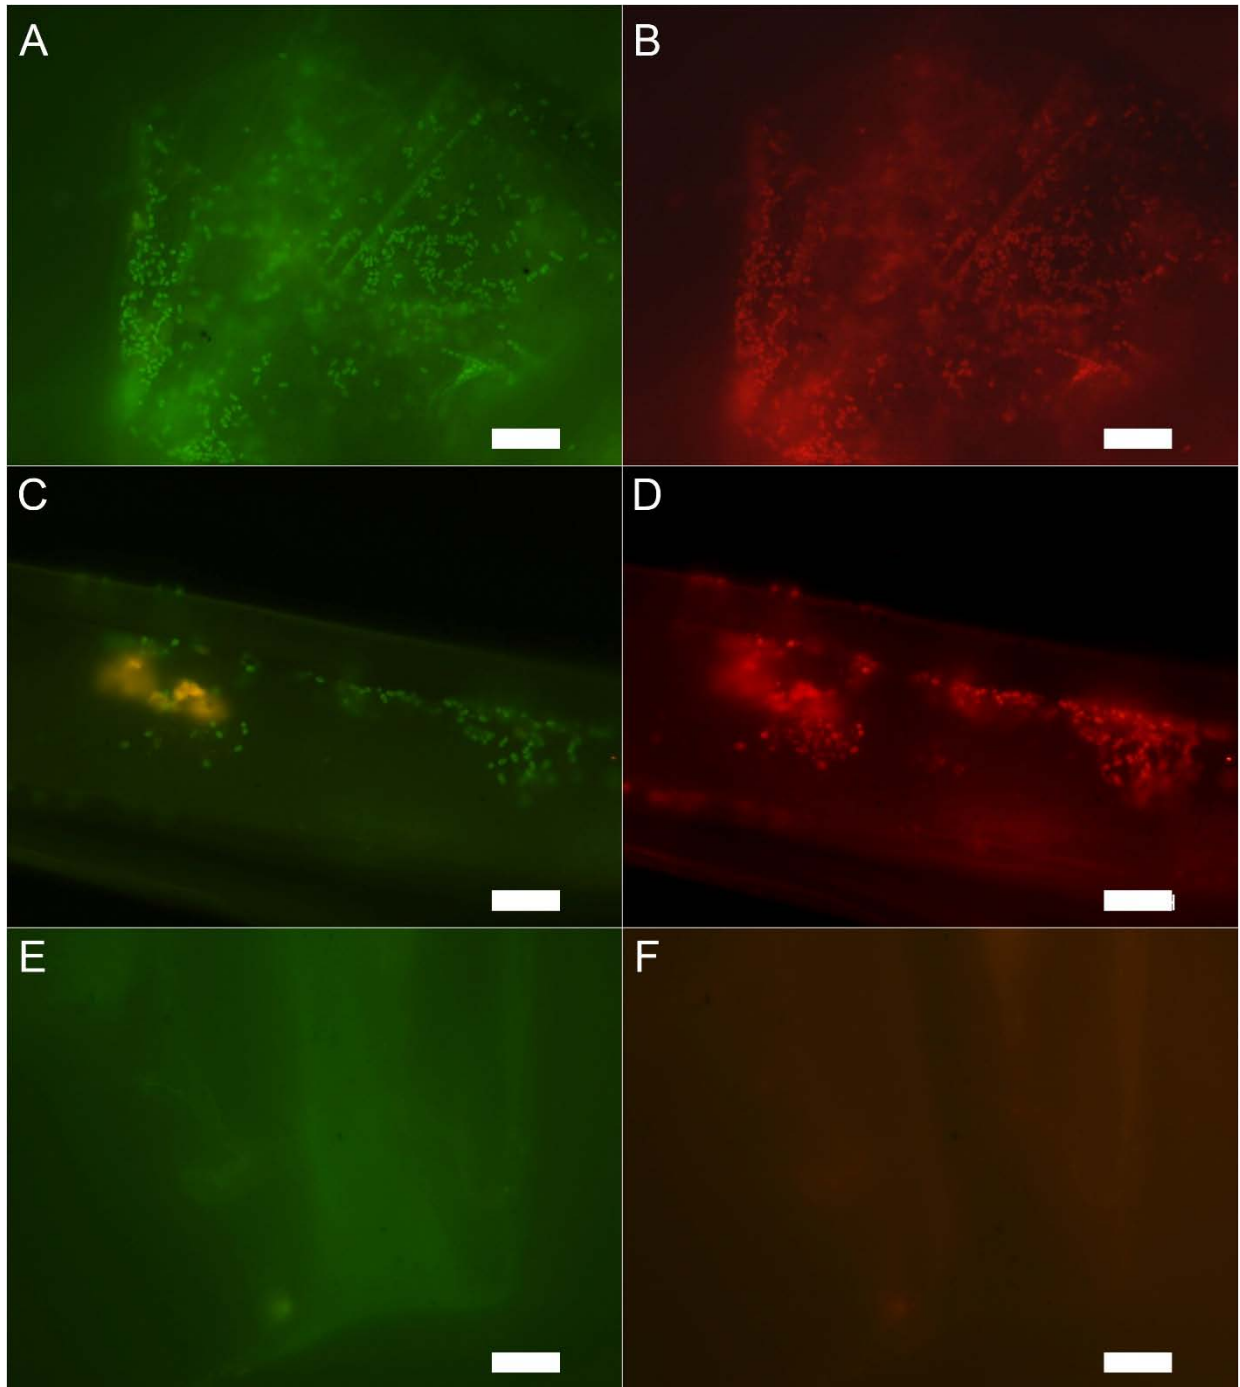

**Figure S5** Examples of epifluorescent microscopy images used to assess the relative abundance of *Gammaproteobacteria* in selected FISH-stained sponge samples. A and C) Signal of FITC-labelled FISH probes Gam42a. B and D) Signal of the Cy3-labelled FISH probes EUB338MIX. E and F) FISH negative control, stained with the non-sense probe NONEUB labelled with FITC and Cy3, respectively. Scale bars: 15  $\mu$ m.

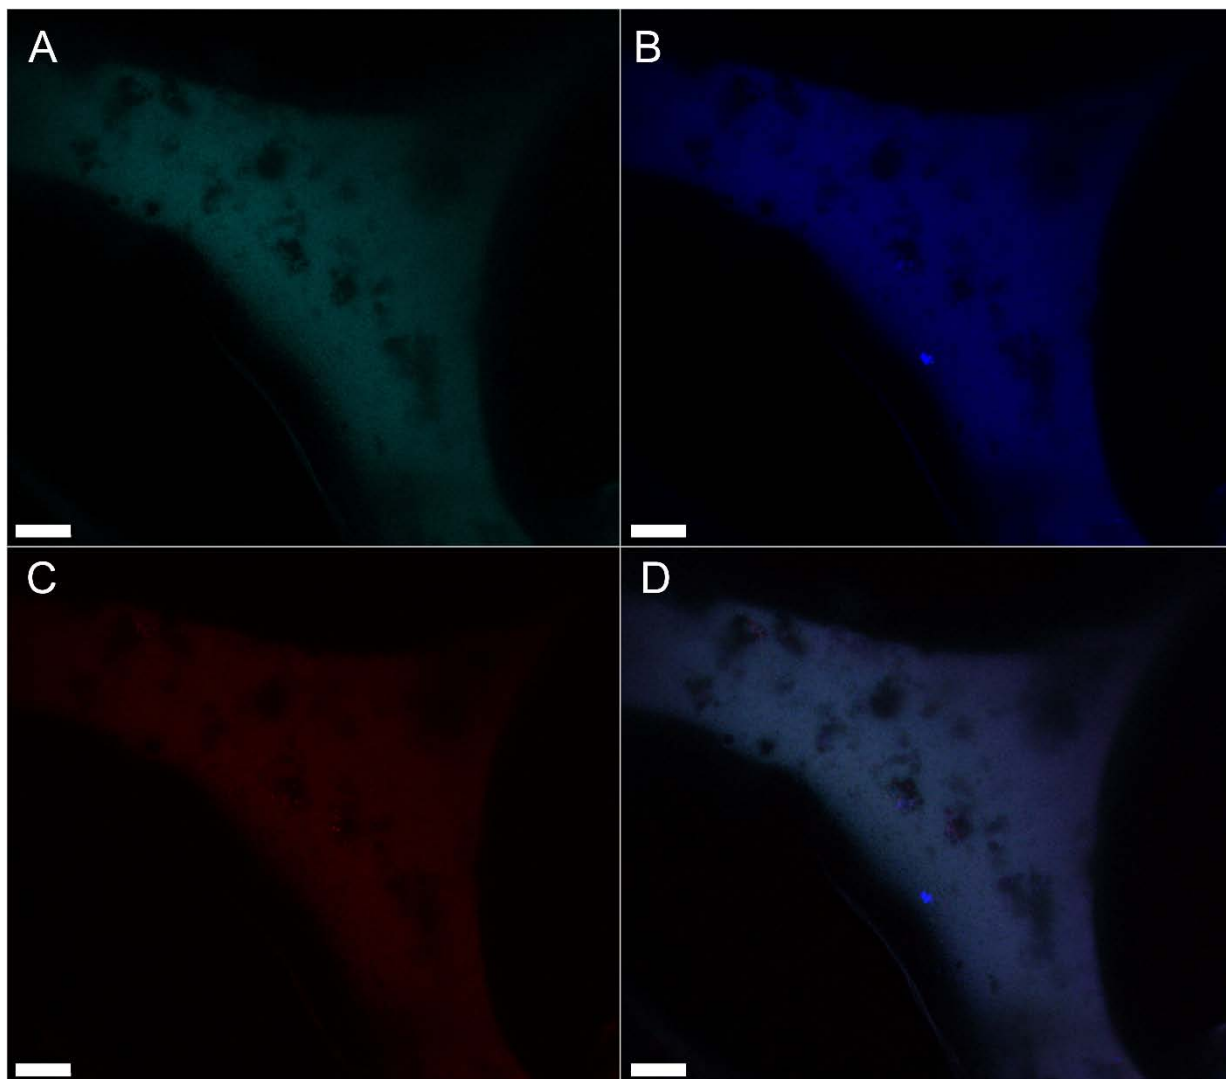

**Figure S6** Maximum projection of a confocal laser-scanning microscopy image series, showing the FISH negative control of the kitchen sponge sample 6b. A) Sponge autofluorescence. B) Signal of FITC-labelled NONEUB probe. C) Signal of Cy3-labelled NONEUB probe. D) Overlap of A-C. Scale bars: 20  $\mu\text{m}$ .

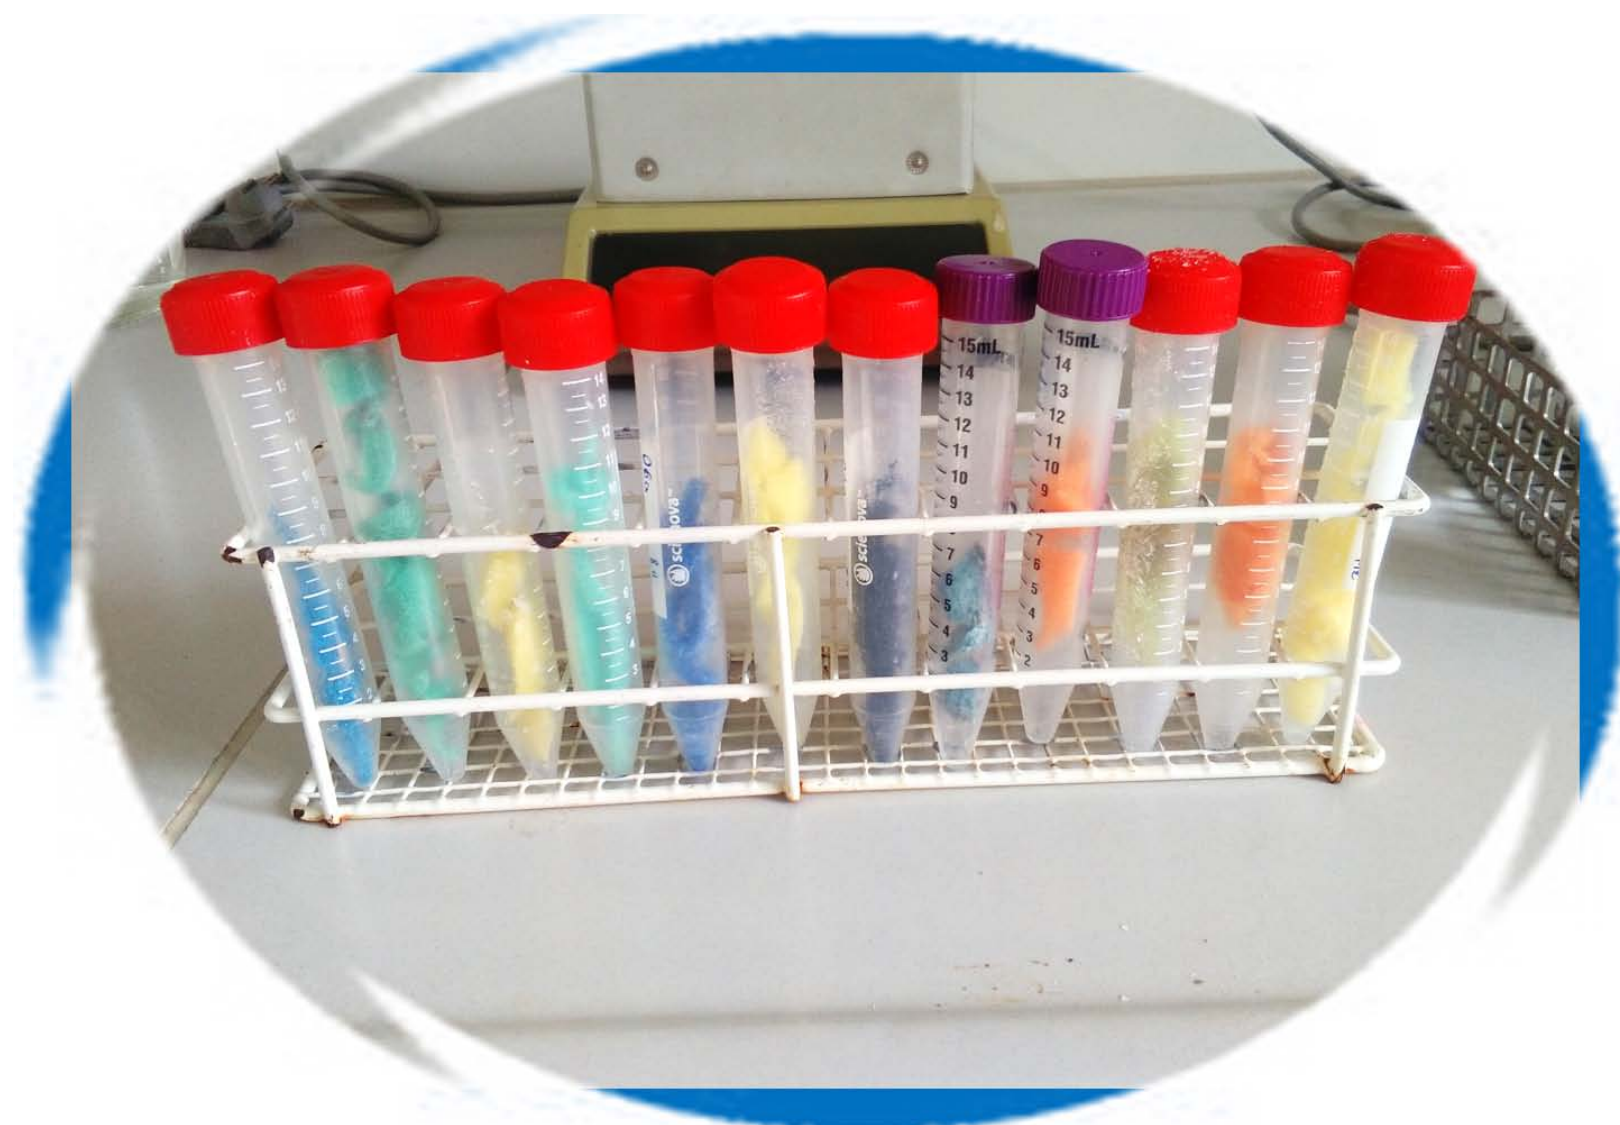

**Figure S7** Examples of sponge samples used in this work

**Table S1** Sponge samples analyzed in this work and their respective metadata

| Sample | Intrinsic factors |             |               | Extrinsic factors |               |                  |                       |
|--------|-------------------|-------------|---------------|-------------------|---------------|------------------|-----------------------|
|        | Sponge            | Sponge side | Brand product | Change frequency  | Use frequency | Special cleaning | Persons per household |
| 1a     | 1                 | Bottom      | No            | Weekly            | Not daily     | No               | 1-3                   |
| 2a     | 2                 | Bottom      | No            | Monthly           | Not daily     | Yes              | 1-3                   |
| 3a     | 3                 | Bottom      | Yes           | Monthly           | Daily         | Yes              | 1-3                   |
| 4a     | 4                 | Bottom      | No            | Weekly            | Daily         | No               | 5-20                  |
| 5a     | 5                 | Bottom      | No            | Weekly            | Daily         | Yes              | 1-3                   |
| 6a     | 6                 | Bottom      | Yes           | Monthly           | Daily         | No               | 1-3                   |
| 7a     | 7                 | Bottom      | No            | Weekly            | Not daily     | No               | 1-3                   |
| 8a     | 8                 | Bottom      | No            | Weekly            | Not daily     | No               | 1-3                   |
| 9a     | 9                 | Bottom      | Yes           | Monthly           | Daily         | No               | 5-20                  |
| 10a    | 10                | Bottom      | No            | Monthly           | Daily         | Yes              | 1-3                   |
| 12a    | 12                | Bottom      | No            | Monthly           | Daily         | No               | 5-20                  |
| 13a    | 13                | Bottom      | Yes           | Monthly           | Daily         | No               | 1-3                   |
| 14a    | 14                | Bottom      | No            | Weekly            | Not daily     | No               | 1-3                   |
| 15a    | 15                | Bottom      | No            | Monthly           | Daily         | Yes              | 1-3                   |
| 1b     | 1                 | Top         | No            | Weekly            | Not daily     | No               | 1-3                   |
| 2b     | 2                 | Top         | No            | Monthly           | Not daily     | Yes              | 1-3                   |
| 3b     | 3                 | Top         | Yes           | Monthly           | Daily         | Yes              | 1-3                   |
| 4b     | 4                 | Top         | No            | Weekly            | Daily         | No               | 5-20                  |
| 5b     | 5                 | Top         | No            | Weekly            | Daily         | Yes              | 1-3                   |
| 6b     | 6                 | Top         | Yes           | Monthly           | Daily         | No               | 1-3                   |
| 7b     | 7                 | Top         | No            | Weekly            | Not daily     | No               | 1-3                   |
| 8b     | 8                 | Top         | No            | Weekly            | Not daily     | No               | 1-3                   |
| 9b     | 9                 | Top         | Yes           | Monthly           | Daily         | No               | 5-20                  |
| 10b    | 10                | Top         | No            | Monthly           | Daily         | Yes              | 1-3                   |
| 12b    | 12                | Top         | No            | Monthly           | Daily         | No               | 5-20                  |
| 13b    | 13                | Top         | Yes           | Monthly           | Daily         | No               | 1-3                   |
| 14b    | 14                | Top         | No            | Weekly            | Not daily     | No               | 1-3                   |
| 15b    | 15                | Top         | No            | Monthly           | Daily         | Yes              | 1-3                   |



**Table S2** Alpha–diversity metrics of the used kitchen sponge samples analyzed in this work, as calculated from the rarefied pyrosequencing dataset at an even depth of 357 sequences per sample. Sample number indicate the individual sponge, while letters indicate the top (a) or bottom (b) site. The last row shows the significance of the factor “sponge” for each index (in red the significant values at  $p < 0.05$ ).

| Sample | Good’s coverage | Shannon | Equitability | Dominance | Simpson | Simpson reciprocal <sup>#</sup> | Simpson evenness | PD whole tree | Chao1  | Number of OTUs |
|--------|-----------------|---------|--------------|-----------|---------|---------------------------------|------------------|---------------|--------|----------------|
| 1a     | 0.972           | 4.167   | 0.783        | 0.086     | 0.914   | 11.600                          | 0.290            | 5.366         | 44.500 | 40             |
| 2a     | 0.927           | 4.385   | 0.739        | 0.112     | 0.888   | 8.927                           | 0.146            | 7.253         | 88.083 | 61             |
| 3a     | 0.975           | 2.807   | 0.604        | 0.233     | 0.767   | 4.283                           | 0.171            | 3.736         | 30.143 | 25             |
| 4a     | 0.944           | 3.402   | 0.669        | 0.146     | 0.854   | 6.830                           | 0.201            | 5.241         | 97.333 | 34             |
| 5a     | 0.980           | 2.889   | 0.648        | 0.217     | 0.783   | 4.617                           | 0.210            | 3.060         | 29.000 | 22             |
| 6a     | 0.975           | 2.499   | 0.532        | 0.365     | 0.635   | 2.742                           | 0.105            | 4.301         | 32.000 | 26             |
| 7a     | 0.950           | 2.978   | 0.576        | 0.224     | 0.776   | 4.459                           | 0.124            | 5.993         | 66.600 | 36             |
| 8a     | 0.958           | 4.565   | 0.801        | 0.067     | 0.933   | 14.996                          | 0.288            | 7.457         | 59.000 | 52             |
| 9a     | 0.983           | 2.126   | 0.558        | 0.329     | 0.671   | 3.037                           | 0.217            | 2.728         | 29.000 | 14             |
| 10a    | 0.969           | 2.947   | 0.627        | 0.197     | 0.803   | 5.077                           | 0.195            | 3.485         | 37.000 | 26             |
| 12a    | 0.955           | 5.044   | 0.872        | 0.040     | 0.960   | 24.733                          | 0.450            | 5.132         | 67.000 | 55             |
| 13a    | 0.944           | 4.772   | 0.815        | 0.060     | 0.940   | 16.563                          | 0.286            | 7.465         | 77.000 | 58             |
| 14a    | 0.983           | 1.617   | 0.425        | 0.531     | 0.469   | 1.885                           | 0.135            | 2.193         | 19.000 | 14             |
| 15a    | 0.994           | 1.879   | 0.508        | 0.448     | 0.552   | 2.233                           | 0.172            | 2.657         | 13.250 | 13             |
| 1b     | 0.986           | 2.610   | 0.604        | 0.265     | 0.735   | 3.778                           | 0.189            | 3.041         | 22.500 | 20             |
| 2b     | 0.947           | 3.865   | 0.712        | 0.133     | 0.867   | 7.509                           | 0.175            | 5.632         | 71.500 | 43             |
| 3b     | 0.969           | 2.286   | 0.538        | 0.286     | 0.714   | 3.495                           | 0.184            | 2.961         | 46.500 | 19             |
| 4b     | 0.964           | 3.548   | 0.692        | 0.147     | 0.853   | 6.790                           | 0.194            | 5.661         | 46.143 | 35             |
| 5b     | 0.980           | 3.746   | 0.788        | 0.103     | 0.897   | 9.743                           | 0.361            | 3.432         | 37.500 | 27             |
| 6b     | 0.986           | 0.927   | 0.251        | 0.749     | 0.251   | 1.334                           | 0.103            | 2.513         | 15.000 | 13             |
| 7b     | 0.969           | 2.127   | 0.464        | 0.430     | 0.570   | 2.327                           | 0.097            | 3.112         | 33.167 | 24             |
| 8b     | 0.952           | 4.092   | 0.737        | 0.110     | 0.890   | 9.072                           | 0.193            | 6.561         | 64.000 | 47             |
| 9b     | 0.997           | 1.638   | 0.546        | 0.412     | 0.588   | 2.425                           | 0.303            | 1.918         | 8.000  | 8              |
| 10b    | 0.972           | 2.618   | 0.551        | 0.325     | 0.675   | 3.074                           | 0.114            | 3.857         | 38.250 | 27             |

|                                            |         |         |       |       |       |                     |       |       |         |         |
|--------------------------------------------|---------|---------|-------|-------|-------|---------------------|-------|-------|---------|---------|
| 12b                                        | 0.955   | 4.172   | 0.764 | 0.098 | 0.902 | 10.185              | 0.231 | 4.406 | 57.333  | 44      |
| 13b                                        | 0.927   | 5.067   | 0.851 | 0.042 | 0.958 | 23.791              | 0.384 | 5.867 | 102.625 | 62      |
| 14b                                        | 0.983   | 2.387   | 0.627 | 0.238 | 0.762 | 4.201               | 0.300 | 1.924 | 29.000  | 14      |
| 15b                                        | 0.989   | 2.250   | 0.550 | 0.378 | 0.622 | 2.644               | 0.156 | 2.892 | 18.500  | 17      |
| ANOVA (between sponges),<br><i>p</i> value | < 0.001 | < 0.001 | 0.005 | 0.012 | 0.012 | 0.045 <sup>##</sup> | 0.08  | 0.001 | 0.003   | < 0.001 |

<sup>#</sup> Not normally distributed variable

<sup>##</sup> Kruskal–Wallis test

**Table S3** Comparison of the relative abundance of major taxa (family level) between our work and the sponge sample analyzed by Flores *et al.*, 2013. Mean ( $\pm$  Std error for this work's samples) is indicated.

| Family                    | Relative abundance (% of microbiome) |                              |
|---------------------------|--------------------------------------|------------------------------|
|                           | This work                            | Flores <i>et al.</i> , 2013* |
| <i>Moraxellaceae</i>      | 36.04 $\pm$ 4.86                     | 40.39                        |
| <i>Pseudomonadaceae</i>   | 9.58 $\pm$ 3.55                      | 7.48                         |
| <i>Rhizobiaceae</i>       | 4.01 $\pm$ 0.78                      | 3.22                         |
| <i>Flavobacteriaceae</i>  | 1.31 $\pm$ 0.76                      | 1.98                         |
| <i>Staphylococcaceae</i>  | 0.037 $\pm$ 0.022                    | 0.02                         |
| [ <i>Weeksellaceae</i> ]  | 21.90 $\pm$ 3.70                     | n.d.**                       |
| <i>Sphingomonadaceae</i>  | 3.12 $\pm$ 1.02                      | 0.42                         |
| <i>Xanthomonadaceae</i>   | 3.21 $\pm$ 1.25                      | 16.16                        |
| <i>Enterobacteriaceae</i> | 1.18 $\pm$ 0.24                      | 16.86                        |
| <i>Acetobacteraceae</i>   | 0.18 $\pm$ 0.09                      | 4.40                         |

\*Flores, G. E., Bates, S. T., Caporaso, J. G., Lauber, C. L., Leff, J. W., Knight, R. & Fierer, N. Diversity, distribution and sources of bacteria in residential kitchens. *Env Microbiol* **15**, 588–596 (2013)

\*\*n.d. = not detected

**Table S4** Properties of the FISH probes used in this work

| Probe name                                    | Sequence (5'-3')   | Fluorochrome | Target                     | % Formamide (at 42°C) |
|-----------------------------------------------|--------------------|--------------|----------------------------|-----------------------|
| EUB338*                                       | GCTGCCTCCCGTAGGAGT | Cy3          | Most bacteria              | 35                    |
| EUB338II*                                     | GCAGCCACCCGTAGGTGT | Cy3          | <i>Planctomycetales</i>    | 35                    |
| EUB338III*                                    | GCTGCCACCCGTAGGTGT | Cy3          | <i>Verrucomicrobiales</i>  | 35                    |
| Gam42a**                                      | GCCTTCCCACATCGTTT  | FITC         | <i>Gammaproteobacteria</i> | 35                    |
| Gam42a-competitor (unlabelled Bet42a probe)** | GCCTTCCCCTTCGTTT   | /            | <i>Betaproteobacteria</i>  | 35                    |
| NONEUB***                                     | ACTCCTACGGGAGGCAGC | Cy3          | /                          | 35                    |
| NONEUB***                                     | ACTCCTACGGGAGGCAGC | FITC         | /                          | 35                    |

\*, \*\* and \*\*\* used mixed in equimolar concentration

**Log file S1** Results of length/quality filtering of the pyrosequencing reads, obtained with QIIME 1.9.

---

|                                              |        |
|----------------------------------------------|--------|
| Number raw input seqs                        | 223741 |
| Length outside bounds of 480 and 540         | 136675 |
| Num ambiguous bases exceeds limit of 6       | 197    |
| Missing Qual Score                           | 0      |
| Mean qual score below minimum of 25          | 5245   |
| Max homopolymer run exceeds limit of 6       | 363    |
| Num mismatches in primer exceeds limit of 1: | 46882  |

Sequence length details for all sequences passing quality filters:

|                       |                   |
|-----------------------|-------------------|
| Raw len min/max/avg   | 480.0/540.0/516.7 |
| Wrote len min/max/avg | 450.0/510.0/486.7 |

Barcodes corrected/not 281/1198

Uncorrected barcodes will not be written to the output fasta file.

Corrected barcodes will be written with the appropriate barcode category.

Corrected but unassigned sequences will not be written unless --retain\_unassigned\_reads is enabled.

Total valid barcodes that are not in mapping file 0

Sequences associated with valid barcodes that are not in the mapping file will not be written.

Barcodes in mapping file

Num Samples 28

Sample ct min/max/mean: 386 / 1520 / 1185.04

| Sample | Sequence Count | Barcode    |
|--------|----------------|------------|
| 15b    | 1520           | AGTACGCTAT |
| 6b     | 1453           | TAGAGACGAG |
| 4b     | 1417           | TACGAGTATG |
| 2a     | 1402           | ACGCTCGACA |
| 13b    | 1385           | AGACTATACT |
| 15a    | 1383           | TCTACGTAGC |
| 9a     | 1379           | TAGTATCAGC |
| 6a     | 1375           | ATATCGCGAG |
| 5b     | 1351           | TACTCTCGTG |
| 1b     | 1347           | CGTGTCTCTA |
| 12b    | 1275           | ACTGTACAGT |
| 12a    | 1256           | ATACGACGTA |
| 14a    | 1249           | CGTCTAGTAC |
| 3a     | 1230           | AGACGCACTC |
| 8a     | 1222           | ACGACTACAG |
| 5a     | 1216           | ATCAGACACG |
| 14b    | 1206           | AGCGTCGTCT |
| 10a    | 1108           | TCTCTATGCG |
| 7a     | 1098           | TGTACTACTC |
| 3b     | 1098           | CGTAGACTAG |
| 4a     | 1095           | AGCACTGTAG |
| 10b    | 1082           | ACTACTATGT |

|     |      |            |
|-----|------|------------|
| 2b  | 1028 | CTCGCGTGTC |
| 1a  | 1008 | ACGAGTGCGT |
| 13a | 944  | TCACGTACTA |
| 9b  | 903  | ACGCGAGTAT |
| 7b  | 765  | TCGTCGCTCG |
| 8b  | 386  | ACATACGCGT |

Total number seqs written 33181

---

**Video file S1:** Video animation of the sponge sample 9B. The sponge sample was stained by FISH, using the Cy3-labelled EUB338MIX probe, and observed by confocal microscopy; this confocal series is composed of 52 optical slices and was acquired using a Z-step of 0.63 $\mu$ m. The three-dimensional model was created with the software Imaris 8.3 (Bitplane, Zurich, Switzerland), by converting the sponge autofluorescence signals into iso-surfaces and the bacterial FISH-conferred signals into spheres, respectively.

**Partial 16S rRNA gene sequences of the OTUs displayed in Fig. 2 of the main text.**

**Not aligned**

>OTU586 (*Sphingobium*)

AACGAACGCTGGCGGCATGCCTAATACATGCAAGTCGAACGAGATCTTCGGATCTA  
GTGGCGCACGGGTGCGTAACGCGTGGGAATCTGCCCTTGGGTTCCGAATAACTTCT  
GGAAACGGAAGCTAATACCGGATGATGACGTAAGTCCAAAGATTTATCGCCCAAG  
GATGAGCCCGCGTAGGATTAGCTAGTTGGTGGGGTAAAGGCTCACCAAGGCGACG  
ATCCTTAGCTGGTCTGAGAGGATGATCAGCCACACTGGGACTGAGACACGGCCCA  
GACTCCTACGGGAGGCAGCAGTAGGGAATATTGGACAATGGGCGAAAGCCTGATC  
CAGCAATGCCGCGTGAGTGATGAAGGCCTTAGGGTTGTAAAGCTCTTTTACCCGGG  
ATGATAATGACAGTACCGGAGAATAAGCTCCGGCTAACTCCGTGCCAGCAGCCGC  
GGTAATATAGAGACACG

>OTU2089 (*Agrobacterium*)

AACGAACGCTGGCGGCAGGCTTAACACATGCAAGTCGAACGCCCCGCAAGGGGAG  
TGGCAGACGGGTGAGTAACGCGTGGGAACATAACCCTTTCCTGCGGAATAGCTCCGG  
GAAACTGGAATTAATACCGCATAACGCCCTACGGGGGAAAGATTTATCGGGGAAGG  
ATTGGCCCGCGTTGGATTAGCTAGTTGGTGGGGTAAAGGCCTACCAAGGCGACGAT  
CCATAGCTGGTCTGAGAGGATGATCAGCCACATTGGGACTGAGACACGGCCCAA  
CTCCTACGGGAGGCAGCAGTGGGGAATATTGGACAATGGGCGCAAGCCTGATCCA  
GCCATGCCGCGTGAGTGATGAAGGCCTTAGGGTTGTAAAGCTCTTTCACCGATGAA  
GATAATGACGGTAGTCGGAGAAGAAGCCCCGGCTAACTTCGTGCCAGCCGCCGCG  
GTAATACTGTAGTCGT

>OTU1492 (*Acinetobacter*)

ATTGAACGCTGGCGGCAGGCTTAACACATGCAAGTCGAGCGGAGAGAGGTAGCTT  
GCTACTGATCTTAGCGGGCGGACGGGTGAGTAATGCTTAGGAATCTGCCTATTAGTG  
GGGGACAACATTTTCGAAAGGAATGCTAATACCGCATAACGTCCTACGGGAGAAAGC  
AGGGGATCTTCGGACCTTGCCTAATAGATGAGCCTAAGTCGGATTAGCTAGTTGG  
TGGGTAAAGGCCTACCAAGGCGACGATCTGTAGCGGGTCTGAGAGGATGATCCGC  
CACACTGGGACTGAGACACGGCCCAGACTCCTACGGGAGGCAGCAGTGGGGAATA  
TTGGACAATGGGCGCAAGCCTGATCCAGCCATGCCGCGTGTGTGAAGAAGGCCTTA  
TGGTTGTAAAGCACTTTAAGCGAGGAGGAGGCTACTTTAGTAATACCTAGAGATAG  
TGGACGTTACTCGCAGAATAAGCACCCGGCTAACTCCGTAGCCG

>OTU47 (*Chryseobacterium*)

GATGGACGCTAGCGGGAGGCCTAACACATGCAAGCCGAGCGGTAGAGTTTCTTCG  
GAAACTTGAGAGCGGGCGCACGGGTGCGTAACACGTGTGCAACCTACCTTTATCTGG  
GGGATAGCCTTTCGAAAGGAAGATTAATACCCATAATATAATGATTGGCATCAAT  
TATTATTGAAAACCTCCGGTGGATAGAGATGGGCACGCGCAAGATTAGATAGTTGGT  
GAGGTAACGGCTCACCAAGTCAATGATCTTTAGGGGTCCTGAGAGGGAGATCCCCC  
ACACTGGTACTGAGACACGGACCAGACTCCTACGGGAGGCAGCAGTGAGGAATAT  
TGGACAATGGGTGAGAGCCTGATCCAGCCATCCCGCGTGAAGGATGACGGTCCTAT  
GGATTGTAAACTTCTTTTGTACAGGGATAAACCTACTCTCGTGAGGGTAGCTGAAG  
GTACTGTACGAATAAGCACCCGGCTAACTCCGTGCCAGCAGCCGCGGTAATACG

>OTU2007 (*Pseudomonas*)

ATTGAACGCTGGCGGCAGGCCTAACACATGCAAGTCGAGCGGATGATGGGAGCTT  
GCTCCTGGATTCAGCGGGCGGACGGGTGAGTAATGCCTAGGAATCTGCCTGGTAGTG  
GGGGACAACGTTTCGAAAGGAACGCTAATACCGCATAACGTCCTACGGGAGAAAGC  
AGGGGACCTTTCGGGCCTTGCCTATCAGATGAGCCTAGGTCGGATTAGCTTGTGG  
TGAGGTAATGGCTCACCAAGGCGACGATCCGTAACCTGGTCTGAGAGGATGATCAG  
TCACACTGGAACCTGAGACACGGTCCAGACTCCTACGGGAGGCAGCAGTGGGGAAT



ATTGGACAATGGGCGAAAGCCTGATCCAGCCATGCCGCGTGTGTGAAGAAGGTCTT  
CGGATTGTAAAGCACTTTAAGTTGGGAGGAAGGGTTGTAGATTAATACTCTGCAAT  
TTTGACGTTTACCGACAGAATAAGCACCGGCTAACTCTGTGCC

>OTU99 (Moraxella)

ATTGAACGCTGGCGGCAGGCTTAACACATGCAAGTCGAACGATGACTCTCTAGCTT  
GCTAGAGATGATTAGTGGCGGACGGGTGAGTAACATTTAGGAATCTACCTAGTAGT  
GGGGGATAGCTCGGGGAAACTCGAATTAATACCGCATAACGACCTACGGGTGAAAG  
GGGGCGCAAGCTCTTGCTATTAGATGAGCCTAAATCAGATTAGCTAGTTGGTGGGG  
TAAAGGCCACCAAGGCGACGATCTGTAACCTGGTCTGAGAGGATGATCAGTCACA  
CCGGAACCTGAGACACGGTCCGGACTCCTACGGGAGGCAGCAGTGGGGAATATTGG  
ACAATGGGGGCAACCCTGATCCAGCCATGCCGCGTGTGTGAAGAAGGCCTTTTGGT  
TGTAAGCACTTTAAGCAGGGAGGAGAGGCTAATGGTTAATACCCATTAGATTAG  
ACGTTACCTGCAGAATAAGCACCGGCTAACTCTGTGCCAGCAGCCGACGG

>OTU3112 (Chryseobacterium)

GATGAACGCTAGCGGGAGGCCTAACACATGCAAGCCGAGCGGTATTTGTTCTTCGG  
AACAGAGAGAGCGGCGCACGGGTGCGGAACACGTGTGCAACCTGCCTTTATCTGG  
GGGATAGCCTTTCGAAAGGAAGATTAATACCCATAATATATTGAGTGGCATCATT  
TGATATTGAAAACCTCCGGTGGATAGAGATGGGCACGCGCAAGATTAGATAGTTGG  
TGAGGTAACGGCTACCAAGTCAATGATCTTTAGGGGGCCTGAGAGGGTGATCCCC  
CACACTGGTACTGAGACACGGACCAGACTCCTACGGGAGGCAGCAGTGAGGAATA  
TTGGACAATGGGTTAGCGCCTGATCCAGCCATCCCGCGTGAAGGACGACGGCCCTA  
TGGGTTGTAAACTTCTTTTGTATAGGGATAAACCTACTCTCGTGAGAGTAGCTGAA  
GGTACTATACGAATAAGCACCGGCTAACTCCGTGCCAGCAGCCGACGG

>OTU1844 (Brevundimonas)

AGCGAACGCTGGCGGCAGGCCTAACACATGCAAGTCGAACGGACCCTTCGGGGTT  
AGTGGCGGACGGGTGAGTAACACGTGGGAACGTGCCTTTAGGTTTCGGAATAGCTC  
CTGGAAACGGGTGGTAATGCCGAATGTGCCCTTCGGGGGAAAGATTTATCGCCTTT  
AGAGCGGCCCGCGTCTGATTAGCTAGTTGGTGAGGTAACGGCTACCAAGGCGAC  
GATCAGTAGCTGGTCTGAGAGGATGACCAGCCACACTGGGACTGAGACACGGCCC  
AGACTCCTACGGGAGGCAGCAGTGGGGAATCTTGCGCAATGGGCGAAAGCCTGAC  
GCAGCCATGCCGCGTGAATGATGAAGGTCTTAGGATTGTAAAATTCTTTCACCGGG  
GACGATAATGACGGTACCCGGAGAAGAAGCCCCGGCTAACTTCGTGCCAGCAGCC  
GCCGTAATACACGAGAGTA

>OTU893 (Acinetobacter)

ATTGAACGCTGGCGGCAGGCTTAACACATGCAAGTCGAGCGGGGAAAGGTAGCTT  
GCTACCTGACCTAGCGGCGGACGGGTGAGTAATGCTTAGGAATCTGCCTATTAGTG  
GGGGACAACATTCCGAAAGGAATGCTAATACCGCATAACGCCCTACGGGGGAAAGC  
AGGGGATCTTCGGACCTTGCCTAATAGATGAGCCTAAGTCAGATTAGCTAGTTGG  
TGGGGTAAAGGCCTACCAAGGCGACGATCTGTAGCGGGTCTGAGAGGATGATCCG  
CCACACTGGGACTGAGACACGGCCCAGACTCCTACGGGAGGCAGCAGTGGGGAAT  
ATTGGACAATGGGCGAAAGCCTGATCCAGCCATGCCGCGTGTGTGAAGAAGGCCT  
TTTGGTTGTAAAGCACTTTAAGCGAGGAGGAGGCTACTTAGATTAATACTCTAGGA  
TAGTGGACGTTACTCGCAGAATAAGCACCGGCTAACTCTGTGCCAGCCGCCG

>OTU2385 (Acinetobacter)

ATTGAACGCTGGCGGCAGGCTTAACACATGCAAGTCGAGCGGAGAGAAGTAGCTT  
GCTACTGATCTTAGCGGCGGACGGGTGAGTAATACTTAGGAATCTGGCTATTAGTG  
GGGGACAACATTTTCGAAAGGGATGCTAATACCGCATAACGTCCTACGGGAGAAAGC  
AGGGGATCTTCGGACCTTGCCTAATAGATGAGCCTAAGTCGGATTAGCTAGTTGG  
TGGGGTAAAGGCCTACCAAGGCGACGATCTGTAGCGGGTCTGAGAGGATGATCCG  
CCACACTGGGACTGAGACACGGCCCAGACTCCTACGGGAGGCAGCAGTGGGGAAT  
ATTGGACAATGGGGGGAACCCTGGATCCAGCCATGCCGCGTGTGTGAAGAAGGCC

TTATGGTTGTAAAGCACTTTAAGCGAGGAGGAGGGTACTGGTATTAATACTACCAG  
GTACTGGACGTTACTCGCAGAATAAGCACCGGCTAACTCTGTGCCAGCCGCGAC

>Moraxella osloensis DSM 6998 (NR113392)

GAGTTTGATCCTGGCTCAGATTGAACGCTGGCGGCAGGCTTAACACATGCAAGTCG  
AACGATGACTCTCTAGCTTGCTAGAGATGATTAGTGGCGGACGGGTGAGTAACATT  
TAGGAATCTACCTAGTAGTGGGGGATAGCTCGGGGAAACTCGAATTAATACCGCAT  
ACGACCTACGGGTGAAAGGGGGCGCAAGCTCTTGCTATTAGATGAGCCTAAATCA  
GATTAGCTAGTTGGTGGGGTAAAGGCCACCAAGGCGACGATCTGTAACCTGGTCTG  
AGAGGATGATCAGTCACACCGGAACTGAGACACGGTCCGGACTCCTACGGGAGGC  
AGCAGTGGGGAATATTGGACAATGGGGGCAACCCTGATCCAGCCATGCCGCGTGT  
GTGAAGAAGGCCTTTTGGTTGTAAAGCACTTTAAGCAGGGAGGAGAGGCTAATGG  
TTAATACCCATTAGATTAGACGTTACCTGCAGAATAAGCACCGGCTAACTCTGTGC  
CAGCAGCCGCGGTAATACAGAGGGTGCAGCGTAAATCGGAATTACTGGGCGTAA  
AGCGAGTGTAGGTGGCTCATTAAAGTCACATGTGAAATCCCCGGGCTTAACCTGGGA  
ACTGCATGTGATACTGGTGGTGCTAGAATATGTGAGAGGGAAGTAGAATTCCAGGT  
GTAGCGGTGAAATGCGTAGAGATCTGGAGGAATACCGATGGCGAAGGCAGCTTCC  
TGGCATAATATTGACACTGAGATTCGAAAGCGTGGGTAGCAAACAGGATTAGATA  
CCCTGGTAGTCCACGCCGTAAACGATGTCTACTAGCCGTTGGGGTCCTTGAGACTT  
TAGTGGCGCAGTTAACGCGATAAGTAGACCGCCTGGGGAGTACGGCCGCAAGGTT  
AAAACCTCAAATGAATTGACGGGGGCCCGCACAAAGCGGTGGAGCATGTGGTTAAT  
TCGATGCAACGCGAAGAACCTTACCTGGTCTTGACATAGTGAGAATCTYTCAGAGA  
TGAGAGAGTGCCTTCGGGAACTCACATACAGGTGCTGCATGGCTGTCGTCAGCTCG  
TGTCGTGAGATGTTGGGTTAAGTCCCGCAACGAGCGCAACCCTTTTCCTTATTTGCC  
AGCGGGTTAAGCCGGGAACTTTAAGGATACTGCCAGTGACAACTGGAGGAAGGC  
GGGGACGACGTCAAGTCATCATGGCCCTTACGACCAGGGCTACACACGTGCTACA  
ATGGTAGGTACAGAGGGTTGCTACACAGCGATGTGATGCTAATCTCAAAAAGCCTA  
TCGTAGTCCGGATTGGAGTCTGCAACTCGACTCCATGAAGTCGGAATCGCTAGTAA  
TCGCGGATCAGAATGCCGCGGTGAATACGTTCCCGGGCCTTGTACACACCGCCCGT  
CACACCATGGGAGTCTATTGCACCAGAAGTAGGTAGCCTAACGAAAGAGGGGCGCT  
TACCACGGTGTGGTTCGATGACTGGGGTGAAGTCGTAACAAGGTAGCC

>Moraxella osloensis A1920 (NR104936)

TAGAGTTTGATCATGGCTCAGATTGAACGCTGGCGGCAGGCTTAACACATGCAAGT  
CGAACGATGACTCTCTAGCTTGCTAGAGATGATTAGTGGCGGACGGGTGAGTAACA  
TTTAGGAATCTACCTAGTAGTGGGGGATAGCTCGGGGAAACTCGAATTAATACCGC  
ATACGACCTACGGGTGAAAGGGGGCGCAAGCTCTTGCTATTAGATGAGCCTAAATC  
AGATTAGCTAGTTGGTGGGGTAAAGGCCACCAAGGCGACGATCTGTAACCTGGTCT  
GAGAGGATGATCAGTCACACCGGAACTGAGACACGGTCCGGACTCCTACGGGAGG  
CAGCAGTGGGGAATATTGGACAATGGGGGCAACCCTGATCCAGCCATGCCGCGTG  
TGTGAAGAAGGCCTTTTGGTTGTAAAGCACTTTAAGCAGGGAGGAGAGGCTAATG  
GTTAATACCCATTAGATTAGACGTTACCTGCAGAATAAGCACCGGCTAACTCTGTG  
CCAGCAGCCGCGGTAATACAGAGGGTGCAGCGTAAATCGGAATTACTGGGCGTA  
AAGCGAGTGTAGGTGGCTCATTAAAGTCACATGTGAAATCCCCGGGCTTAACCTGGG  
AACTGCATGTGATACTGGTGGTGCTAGAATATGTGAGAGGGAAGTAGAATTCCAG  
GTGTAGCGGTGAAATGCGTAGAGATCTGGAGGAATACCGATGGCGAAGGCAGCTT  
CCTGGCATAATATTGACACTGAGATTCGAAAGCGTGGGTAGCAAACAGGATTAGA  
TACCCTGGTAGTCCACGCCGTAAACGATGTCTACTAGCCGTTGGGGTCCTTGAGAC  
TTAGTGGCGCAGTTAACGCGATAAGTAGACCGCCTGGGGAGTACGGCCGCAAGG  
TTAAAACCTCAAATGAATTGACGGGGGCCCGCACAAAGCGGTGGAGCATGTGGTTA  
ATTTCGATGCAACGCGAAGAACCTTACCTGGTCTTGACATAGTGAGAATCTTTCAGA  
GATGAGAGAGTGCCTTCGGGAACTCACATACAGGTGCTGCATGGCTGTCGTCAGCT  
CGTGTGTCGTGAGATGTTGGGTTAAGTCCCGCAACGAGCGCAACCCTTTTCCTTATTTG

CCAGCGGGTTAAGCCGGGAACCTTTAAGGATACTGCCAGTGACAAACTGGAGGAAG  
GCGGGGACGACGTCAAGTCATCATGGCCCTTACGACCAGGGCTACACACGTGCTAC  
AATGGTAGGTACAGAGGGTTGCTACACAGCGATGTGATGCTAATCTCAAAAAGCCT  
ATCGTAGTCCGGATTGGAGTCTGCAACTCGACTCCATGAAGTCGGAATCGCTAGTA  
ATCGCGGATCAGAATGCCGCGGTGAATACGTTCCCGGGCCTTGTACACACCGCCCCG  
TCACACCATGGGAGTCTATTGCACCAGAAGTAGGTAGCCTAACGAAAGAGGGCGC  
TTACCACGGTGTGGTCGATGACTGGGGTGAAGTCGTAACAAGGTAGCCGTAGGGG  
AACCTGCGGTTGGATCACCTC

>Enhydrobacter aerosaccus G (NR029005)

ATTGAACGCTGGCGGCAGGCTTAACACATGCAAGTCGAACGATGACTCTCTAGCTT  
GCTAGAGATGATTAGTGGCGGACGGGTGAGTAATATTTAGGAATCTGCCTAGTAGT  
GGGGGATAGCTCGGGGAAACTCGAATTAATACCGCATAACGACCTACGGGTGAAAG  
GGGGCGCAAGMTCTTGCTATTAGATGAGCCTAAATCAGATTAGCTAGTTGGTGGG  
GTAAAGGCCACCAAGGCGACGATCTGTAACCTGGTCTGAGAGGATGATCAGTCAC  
ACCGGAACTGAGACACGGTCCGGACTCCTACGGGAGGCAGCAGTGGGGAATATTG  
GACAATGGGGGCAACCCTGATCCAGCCATGCCGCGTGTGTGAAGAAGGCCTTTTGG  
TTGTAAAGCACTTTAAGCAGGGAGGAGAGGCTAATGGTTAATACCCATTAGATTAG  
ACGTTACCTGCAGAATAAGCACCGGCTAACTCTGTGCCAGCAGCCGCGGTAATACA  
GAGGGTGCAGCGTTAATCGGAATTACTGGGCGTAAAGCGAGTGTAGGTGGCTCA  
TTAAGTCACATGTGAAATCCCCGGGCTTAACCTGGGAACTGCATGTGATACTGGTG  
GTGCTAGAATATGTGAGAGGGAAGTAGAATTCCAGGTGTAGCGGTGAAATGCGTA  
GAGATCTGGAGGAATACCGATGGCGAAGGCAGCTTCCTGGCATAATATTGACACT  
GAGATTCGAAAGCGTGGGTAGCAAACAGGATTAGATAACCCTGGTAGTCCACGCCG  
TAAACGATGTCTACTAGCCGTTGGGGTCCTTGAGACTTTAGTGGCGCAGTTAACGC  
GATAAGTAGACCGCCTGGGGAGTACGGCCGCAAGGTAAAACCTCAAATGAATTGA  
CGGGGGCCCGCACAAGCGGTGGAGCATGTGGTTAATTCGATGCAACGCGAAGAA  
CCTTACCTGGTCTTGACATAGTGAGAATCTTTCAGAGATGAGAGAGTGCCTTCGGG  
AATTCACATACAGGTGCTGCATGGCTGTCGTCAGCTCGTGTGTCGTGAGATGTTGGGT  
TAAGTCCCGCAACGAGCGCAACCCTTTTCCTTATTTGCCAGCGGGTTAAGCCGGGA  
ACTTTAAGGATACTGCCAGTGACAAACTGGAGGAAGGCGGGGACGACGTCAAGTC  
ATCATGGCCCTTACGACCAGGGCTACACACGTGCTACAATGGTAGGTACAGAGGGT  
TGCTACACAGCGATGTGATGCTAATCTCAAAAAGCCTATCGTAGTCCGGATTGGAG  
TCTGCAACTCGACTCCATGAAGTCGGAATCGCTAGTAATCGCAGATCAGAATGCTG  
CGGTGAATACGTTCCCGGGCCTTGTACACACCGCCCCGTCACACCATGGGAGTCTAT  
TGCACCAGAAGTAGGTAGCCTAACGAAAGAGGGCGCTTACCACGGTGTGGTCGAT  
GACTGGGGTGAAGTCGTAACAAGGTAGCCGTAGGGGAACC

>Moraxella lincolnii LMG 5127 (NR117693)

ATTGAACGCTGGCGGCAGGCTTAACACATGCAAGTCGAACGAAGAGGTCTAGCTT  
GCTAGACTGATTAGTGGCGAACGGGTGAGTAACATTTAGGAATCTACCTTATAGAG  
GGGGATAGCTCGGGGAAACTCGAATTAATACCGCATAACGACCTACGGGTGAAAGG  
GGGCGCAAGCTCTTGCTATAAGATGAGCCTAAACCAGATTAGCTAGTTGGTGGGGT  
AAAGGCCTACCAAGGCGACGATCTGTAGCTGGTCTGAGAGGATGATCAGCCACAC  
TGGGACTGAGACACGGCCAGACTCCTACGGGAGGCAGCAGTGGGGAATATTGGA  
CAATGGGCGAAAGCCTGATCCAGCCATGCCGCGTGTGTGAAGAAGGCCTTATGGTT  
GTAAAGCACTTTAAGTGGGGAGGAAAAGCTTATGGATAACACCCATAGGTTCTGA  
CGTTACCCACAGAATAAGCACCGGCTAACTCTGTGCCAGCAGCCGCGGTAATACAG  
AGGGTGCAAGCGTTAATCGGAATTACTGGGCGTAAAGCGAGCGTAGGTGGTTTATT  
AAGTCAGATGTGAAATCCCTGGGCTTAACCTAGGAACTGCATCTGATACTGATAAA  
CTAGAGTAGGTGAGAGGAAAGTAGAATTCCAGGTGTAGCGGTGAAATGCGTAGAG  
ATCTGGAGGAATACCGATGGCGAAGGCAGCTTTCTGGCATCATACTGACACTGAGG  
TTCGAAAGCGTGGGTAGCAAACAGGATTAGATAACCCTGGTAGTCCACGCCGTAAA

CGATGTCTACCAGTCGTTGGGTCTTTTAAAGGCTTAGTGACGCAGTTAACGCGATA  
AGTAGACCGCCTGGGGAGTACGGCCGCAAGGTTAAACTCAAATGAATTGACGGG  
GGCCCGCACAAAGCGGTGGAGCATGTGGTTTAAATTCGATGCAACGCGAAGAACCTT  
ACCTGGTCTTGACATAGTGAGAATCTTGCAGAGATGCGAGAGTGCCTTTGGGAATT  
CACATACAGGTGCTGCATGGCTGTCGTCAGCTCGTGTCTGTGAGATGTTGGGTTAAG  
TCCCGCAACGAGCGCAACCCTTTTCCTTAGTTACCAGCGACTTGGTCCGGGGACTTT  
AAGGACACTGCCAGTGACAAACTGGAGGAAGGCGGGGACGACGTCAAGTCATCAT  
GGCCCTTACGACCAGGGCTACACACGTGCTACAATGGTAGGTACAGAGGGCAGCT  
ACACGGCGACGTGATGCCAATCTCAAAAAGCCTATCTTAGTCCAGATTGGAGTCTG  
CAACTCGACTCCATGAAGTCGGAATCGCTAGTAATCGCGGATCAGAATGCCGCGGT  
GAATACGTTCCCGGGCCTTGTACACACCGCCCGTCACACCATGGGAGTTGATTGCA  
CCAGAAGTGGTTAGCCTAACTTAGGAGGGCGATCACCACGGTGTGGTTAATGACTG  
GGGTGAAGTCGTAACAAGGTAGCCGTAGGGGAACCTGCGGCTGGATCACCTCCTT  
A

>Moraxella lincolniai CCUG 9405 (NR117189)

ATTGAACGCTGGCGGCAGGCTTAAACACATGCAAGTCGAACGAAGAGGTCTAGCTT  
GCTAGACTGATTAGTGGCGAACGGGTGAGTAACATTTAGGAATCTACCTTATAGAG  
GGGGATAGCTCGGGGAAACTCGAATTAATACCGCATAACGACCTACGGGTGAAAGG  
GGGCGCAAGCTCTTGCTATAAGATGAGCCTAAACCAGATTAGCTAGTTGGTGGGGT  
AAAGGCCTACCAAGGCGACGATCTGTAGCTGGTCTGAGAGGATGATCAGCCACAC  
TGGGACTGAGACACGGCCAGACTCCTACGGGAGGCAGCAGTGGGGAATATTGGA  
CAATGGGCGAAAGCCTGATCCAGCCATGCCGCGTGTGTGAAGAAGGCCTTATGGTT  
GTAAAGCACTTTTAAAGTGGGGAGAAAAGCTTATGGATAACACCCATAGGTTCTGAC  
GTTACCCACAGAATAAGCACCGGCTAACTCTGTGCCAGCAGCCGCGGTAATACAG  
AGGGTGCAAGCGTTAATCGGAATTACTGGGCGTAAAGCGAGCGTAGGTGGTTTATT  
AAGTCAGATGTGAAATCCCTGGGCTTAACTTAGGAACTGCATCTGATACTGATAAA  
CTAGAGTAGGTGAGAGGAAAGTAGAATTCCAGGTGTAGCGGTGAAATGCGTAGAG  
ATCTGGAGGAATACCGATGGCGAAGGCAGCTTTCTGGCATCATACTGACACTGAGG  
TTCGAAAGCGTGGGTAGCAAACAGGATTAGATACCCTGGTAGTCCACGCCGTA  
CGATGTCTACCAGTCGTTGGGTCTTTTAAAGGCTTAGTGACGCAGTTAACGCGATA  
AGTAGACCGCCTGGGGAGTACGGCCGCAAGGTTAAACTCAAATGAATTGACGGG  
GGCCCGCACAAAGCGGTGGAGCATGTGGTTTAAATTCGATGCAACGCGAAGAACCTT  
ACCTGGTCTTGACATAGTGAGAATCTTGCAGAGATGCGAGAGTGCCTTTGGGAATT  
CACATACAGGTGCTGCATGGCTGTCGTCAGCTCGTGTCTGTGAGATGTTGGGTTAAG  
TCCCGCAACGAGCGCAACCCTTTTCCTTAGTTACCAGCGACTTGGTCCGGGGACTTT  
AAGGACACTGCCAGTGACAAACTGGAGGAAGGCGGGGACGACGTCAAGTCATCAT  
GGCCCTTACGACCAGGGCTACACACGTGCTACAATGGTAGGTACAGAGGGCAGCT  
ACACGGCGACGTGATGCCAATCTCAAAAAGCCTATCTTAGTCCAGATTGGAGTCTG  
CAACTCGACTCCATGAAGTCGGAATCGCTAGTAATCGCGGATCAGAATGCCGCGGT  
GAATACGTTCCCGGGCCTTGTACACACCGCCCGTCACACCATGGGAGTTGATTGCA  
CCAGAAGTGGTTAGCCTAACTTAGGAGGGCGATCACCACGGTGTGGTTAATGACTG  
GGGTGAAGTCGTAACAAGGTAGCCGTAGGGGAACCTGCGGCTGGATCACCTCCTT  
A

>Chryseobacterium hominis NF802 (NR042517.2)

TTTGATCCCTGGCTCAGGATGAACGCTAGCGGGAGGCCTAACACATGCAAGCCGA  
GCGGTATTTGTTCTTCGGAACAGAGAGAGCGGCGCACGGGTGCGGAACACGTGTG  
CAACCTGCCTTTATCTGGGGGATAGCCTTTCGAAAGGAAGATTAATACCCCAT  
ATATTGAGTGGCATCATTTGATATTGAAAACCTCCGGTGGATAGAGATGGGCACGCG  
CAAGATTAGATAGTTGGTGAAGTAACGGCTCACCAAGTCAATGATCTTTAGGGGGC  
CTGAGAGGGTATCCCCACACTGGTACTGAGACACGGACCAGACTCCTACGGGA  
GGCAGCAGTGAGGAATATTGGACAATGGGTTAGCGCCTGATCCAGCCATCCCGCGT

GAAGGACGACGGCCCTATGGGTTGTAAACTTCTTTTGTATAGGGATAAACCTACTC  
TCGTGAGAGTAGCTGAAGGTACTATACGAATAAGCACCGGCTAACTCCGTGCCAGC  
AGCCGCGGTAATACGGAGGGTGCAGCGTTATCCGGATTTATTGGGTTTAAAGGGT  
CCGTAGGCGGATCTGTAAGTCAGTGGTCAAATCTCACAGCTTAACTGTGAACTGC  
CATTGATACTGCAGGTCTTGAGTAAATTTGAAGTGGCTGGAATAAGTAGTGTAGCG  
GTGAAATGCATAGATATTACTTAGAACACCAATTGCGAAGGCAGGTCACTAAGATT  
TAACTGACGCTGATGGACGAAAGCGTGGGGAGCGAACAGGATTAGATACCCTGGT  
AGTCCACGCCGTAAACGATGCTAACTCGTTTTTGGGGYTTCCGGCTTCAGAGACTAA  
GCGAAAGTGATAAGTTAGCCACCTGGGGAGTACGTTTCGCAAGAATGAAACTCAA  
GGAATTGACGGGGGCCCGCACAAAGCGGTGGATTATGTGGTTTAAATTCGATGATACG  
CGAGGAACCTTACCAAGACTTAAATGGGAAATGACAGATTTAGAAATAGATCCTTC  
TTCGGACATTTTTCAAGGTGCTGCATGGTTGTCGTCAGCTCGTGCCGTGAGGTGTTA  
GGTTAAGTCCTGCAACGAGCGCAACCCCTGTCAGTTGCTAGCATTAAGTTGAG  
GACTCTAGTGAGACTGCCTACGCAAGTAGAGAGGAAGGTGGGGATGACGTCAAAT  
CATCACGGCCCTTACGTCTTGGGCCACACACGTAATACAATGGCCGGTACAGAGGG  
CAGCTACACAGCGATGTGATGCAAATCTCGAAAGCCGGTCTCAGTTCGGATTGGAG  
TCTGCAACTCGACTCTATGAAGCTGGAATCGCTAGTAATCGCGCATCAGCCATGGC  
GCGGTGAATACGTTCCCGGGCCTTGTACACACCGCCCGTCAAGCCATGGAAGTCTG  
GGGTACCTGAAGTCGGTGACCGTAAAAGGAGCTGCCTAGGGTAAAACAGGTA  
AGGGCTAAGTCGTAACAAGGTAGCCGTACCCGA

>Chryseobacterium hagamense RHA2-9 (NR115852)

CATGGCTCAGGATGAACGCTAGCGGGAGGCCTAACACATGCAAGCTGAGCGGTAT  
TTGTCTTTCGGGACAGAGAGAGCGGGGTACGGGTGCGGAACACGTGTGCAACCTG  
CCTTTATCTGGGGGATAGCCTTTTCGAAAGGAAGATTAATACCCCATACATATTGA  
GTGGCATCACTTGATATTGAAAACCTCCGGTGGATAGAGATGGGCACGCGCAAGATT  
AGATAGTTGGTGAGGTAACGGCTCACCAAGTCGATGATCTTTAGGGGGCCTGAGA  
GGGTGATCCCCACACTGGTACTGAGACACGGACCAGACTCCTACGGGAGGCAGC  
AGTGAGGAATATTGGACAATGGGTAGCGCCTGATCCAGCCATCCCGCGTGAAGG  
ACGACGGCCCTATGGGTTGTAACTTCTTTTGTACAGGGATAAACCTACCCTCGTG  
AGGGTAGCTGAAGTACTGTACGAATAAGCACCGGCTAACTCCGTGCCAGCAGCC  
GCGGTAATACGGAGGGTGCAGCGTTATCCGGATTTATTGGGTTTAAAGGGTCCGT  
AGGCGGATCTGTAAGTCAGTGGTCAAATCTCACAGCTTAACTGTGAACTGCCATT  
GATACTGCAGGTCTTGAGTAAGGTAGAAGTGGCTGGAATAAGTAGTGTAGCGGTG  
AAATGCATAGATATTACTTAGAACACCAATTGCGAAGGCAGGTCACTATGTCTTAA  
CTGACGCTGATGGACGAAAGCGTGGGGAGCGAACAGGATTAGATACCCTGGTAGT  
CCACGCCGTAAACGATGCTAACTCGTTTTTGGGGCTTTAGGGTTCAGAGACTAAGCG  
AAAGTGATAAGTTAGCCACCTGGGGAGTACGTTTCGCAAGAATGAAACTCAAAGGA  
ATTGACGGGGGCCCGCACAAAGCGGTGGATTATGTGGTTTAAATTCGATGATACGCGA  
GGAACCTTACCAAGGCTTAAATGGGAATTGATTGGTTTAAAGAAATAGACCGTCCTTC  
GGGCAATTTTCAAGGTGCTGCATGGTTGTCGTCAGCTCGTGCCGTGAGGTGTTAGG  
TTAAGTCCTGCAACGAGCGCAACCCCTGTTACTAGTTGCTACCATTAAGTTGAGGA  
CTCTAGTAAGACTGCCTACGCAAGTAGAGAGGAAGGTGGGGATGACGTCAAATCA  
TCACGGCCCTTACGCCTTGGGCCACACACGTAATACAATGGCCGGTACAGAGGGCA  
GCTACCTAGCGATAGGATGCGAATCTCGAAAGCCGGTCTCAGTTCGGATTGGAGTC  
TGCAACTCGACTCTATGAAGCTGGAATCGCTAGTAATCGCGCATCAGCCATGGCGC  
GGTGAATACGTTCCCGGGCCTTGTACACACCGCCCGTCAAGCCATGGAAGTCTGGG  
GTACCTGAAGTCGGTGACTCGTAAACAGGAGCT

>Chryseobacterium bovis H9 (NR044166)

TAGAGGTTTTATCCTGGCTCAGGATGAACGCTAGCGGGAGGCCTAACACATGCAAG  
CCGAGCGGTAGAGTATCTTCGGATACTTGAGAGCGGCGCACGGGTGCGGAACACG  
TGTGCAACCTGCCTTTATCTGGGGGATAGCCTTTTCGAAAGGAAGATTAATACCCCA

TAATATATTTGATGGCATCATTAGATATTGAAAACCTCCGGTGGATAGAGATGGGCA  
CGCGCAAGATTAGTTAGTTGGTGAGGTAACGGCTCACCAAGGCGATGATCTTTAGG  
GGCCTGAGAGGGTGTATCCCCACACTGGTACTGAGACACGGACCAGACTCCTAC  
GGGAGGCAGCAGTGAGGAATATTGGACAATGGGTTAGCGCCTGATCCAGCCATCC  
CGCGTGAAGGACGACGGCCCTATGGGTTGTAAACTTCTTTTGTATAGGGATAAACC  
TACTCTCGTGAGAGTAGCTGAAGGTAATAACGAATAAGCACCCGGCTAACTCCGTG  
CCAGCAGCCGCGGTAATACGGAGGGTGAAGCGTTATCCGGATTTATTGGGTTTAA  
AGGGTCCGTAGGCGGATCTGTAAGTCAGTGGTGAAATCTCATAGCTTAACTATGAA  
ACTGCCATTGATACTGCAGGTCTTGAGTAAATTTGAAGTGGCTGGAATAAGTAGTG  
TAGCGGTGAAATGCATAGATATTACTTAGAACACCAATTGCGAAGGCAGGTCCTA  
AGATTTAACTGACGCTGATGGACGAAAGCGTGGGGAGCGAACAGGATTAGATACC  
CTGGTAGTCCACGCCGTAAACGATGCTAACTCGTTTTTTGTGATTCGTCATGAGAG  
ACTAAGCGAAAGTGATAAGTTAGCCACCTGGGGAGTACGTTTCGCAGGAATGAAAC  
TCAAAGGAATTGACGGGGGCCCGCACAAAGCGGTGGATTATGTGGTTTAAATTCGATG  
ATACGCGAGGAACCTTACCAAGACTTAAATGGGAGTGGACAGGCTTAGAAATAGG  
CCCTCCTTCGGGCCGCTTCCAAGGTGCTGCATGGTTGTCGTCAGCTCGTGCCGTGAG  
GTGTTAGGTTAAGTCCTGCAACGAGCGCAACCCCTGTCGCCAGTTGCTACCATTC  
GTTGAGGACTCTGGCGAGACTGCCTACGCAAGTAGAGAGGAAGGTGGGGATGACG  
TCAAATCATCACGGCCCTTACGTCTTGGGCCACACACGTAATACAATGGCCGGTAC  
AGAGGGCAGCTACACAGCGATGTGATGCAAATCTCGAAAGCCGGTCTCAGTTCGG  
ATTGGAGTCTGCAACTCGACTCTATGAAGCTGGAATCGCTAGTAATCGCGCATCAG  
CCATGGCGCGGTGAATACGTTCCCGGGCCTTGTACACACCCGCCGTCAAGCCATGG  
AAGTCTGGGGTACCTGAAGTCGGTGACCGTAAAAGGAGCTGCCTAGGGTAAAACA  
GGTAACTAGGGCTAAGTCGTAACAAGGTAGCCGATAT

>Chryseobacterium arthrosphaerae CC-VM-7 (NR116977)

GATGAACGCTAGCGGGAGGCCTAACACATGCAAGCCGAGCGGTAGAGATCTTTTCG  
GGATCTTGAGAGCGGCGTACGGGTGCGGAACACGTGTGCAACCTGCCTTTATCAGG  
GGGATAGCCTTTCGAAAGGAAGATTAATACCCATAATATATCGAGTGGCATCACT  
TGATATTGAAAACCTCCGGTGGATAGAGATGGGCACGCGCAAGATTAGATAGTTGG  
TGAGGTAACGGCTCACCAAGTCTGCGATCTTTAGGGGGCCTGAGAGGGTGTATCCCC  
CACACTGGTACTGAGACACGGACCAGACTCCTACGGGAGGCAGCAGTGAGGAATA  
TTGGACAATGGGTGCGAGCCTGATCCAGCCATCCCGCGTGAAGGATGACGGCCCTA  
TGGGTTGTAAACTTCTTTTGTATAGGGATAAACCTACCCTCGTGAGGGTAGCTGAA  
GGTACTATACGAATAAGCACCCGGCTAACTCCGTGCCAGCAGCCGCGGTAATACGG  
AGGGTGCAAGCGTTATCCGGATTTATTGGGTTTAAAGGGTCCGTAGGCGGATCTGT  
AAGTCAGTGGTGAAATCTCACAGCTTAACTGTGAAACTGCCATTGATACTGCAGGT  
CTTGAGTGTGTTGAAGTAGCTGGAATAAGTAGTGTAGCGGTGAAATGCATAGATA  
TTACTTAGAACACCAATTGCGAAGGCAGGTTACTAAGCAACAACCTGACGCTGATGG  
ACGAAAGCGTGGGGAGCGAACAGGATTAGATACCCTGGTAGTCCACGCCGTAAAC  
GATGCTAACTCGTTTTTGGTATTTCCGGTATCAGAGACTAAGCGAAAGTGATAAGTT  
AGCCACCTGGGGAGTACGAACGCAAGTTTGAACCTCAAAGGAATTGACGGGGGCC  
CGCACAAGCGGTGGATTATGTGGTTTAAATTCGATGATACGCGAGGAACCTTACCAA  
GGCTTAAATGGGAAATGACAGGCTTAGAAATAGGCTTTTCTTCGGACATTTTTCAA  
GGTGCTGCATGGTTGTCGTCAGCTCGTGCCGTGAGGTGTTAGGTTAAGTCCTGCAA  
CGAGCGCAACCCCTGTCCTAGTTGCCATCATTAAAGTTGGGGACTCTAGTGAGACT  
GCCTACGCAAGTAGAGAGGAAGGTGGGGATGACGTCAAATCATCACGGCCCTTAC  
GCCTTGGGCCACACACGTAATACAATGGCCGGTACAGAGGGCAGCTACACAGCGA  
TGTGATGCAAATCTCGAAAGCCGGTCTCAGTTCGGATTGGAGTCTGCAACTCGACT  
CTATGAAGCTGGAATCGCTAGTAATCGCGCATCAGCCATGGCGCGGTGAATACGTT  
CCCGGGCCTTGTACACACCCGCCGTCAA

>Acinetobacter johnsonii ATCC 17909 (NR117624)

AGAGTTTGATCATGGCTCAGATTGAACGCTGGCGGCAGGCTTAACACATGCAAGTC  
GAGCGGGGAAAGGTAGCTTGCTACCTAACCTAGCGGGCGGACGGGTGAGTAATGCT  
TAGGAATCTGCCTATTAGTGGGGGACAACATTCCGAAAGGAATGCTAATACCGCAT  
ACGCCCTACGGGGGAAAGCAGGGGATCTTCGGACCTTGCGCTAATAGATGAGCCT  
AAGTCAGATTAGCTAGTTGGTGGGGTAAAGGCCTACCAAGGCGACGATCTGTAGC  
GGGTCTGAGAGGATGATCCGCCACACTGGGACTGAGACACGGCCCAGACTCCTAC  
GGGAGGCAGCAGTGGGGAATATTGGACAATGGGCGAAAGCCTGATCCAGCCATGC  
CGCGTGTGTGAAGAAGGCCTTTTGGTTGTAAAGCACTTTAAGCGAGGAGGAGGCTA  
CTTGGATTAATACTCTAGGATAGTGGACGTTACTCGCAGAATAAGCACCCGGCTAAC  
TCTGTGCCAGCAGCCGCGTAATACAGAGGGTGGCAGCGTTAATCGGATTTACTGG  
GCGTAAAGCGTGCGTAGGCGGCTTTTTAAGTCGGATGTGAAATCCCTGAGCTTAAC  
TTAGGAATTGCATTCGATACTGGGAAGCTAGAGTATGGGAGAGGATGGTAGAATT  
CCAGGTGTAGCGGTGAAATGCGTAGAGATCTGGAGGAATACCGATGGCGAAGGCA  
GCCATCTGGCCTAATACTGACGCTGAGGTACGAAAGCATGGGGAGCAAACAGGAT  
TAGATACCCTGGTAGTCCATGCCGTAACGATGTCTACTAGCCGTTGGGGCCTTTG  
AGGCTTTAGTGGCGCAGCTAACGCGATAAGTAGACCGCCTGGGGAGTACGGTCGC  
AAGACTAAACTCAAATGAATTGACGGGGGCCCGCACAAAGCGGTGGAGCATGTGG  
TTAATTCGATGCAACGCGAAGAACCTTACCTGGTCTTGACATAGTAAGAACTTTC  
CAGAGATGGATTGGTGCCTTCGGGAACCTACATACAGGTGCTGCATGGCTGTCGTC  
AGCTCGTGTGCTGAGATGTTGGGTTAAGTCCCGCAACGAGCGCAACCCTTTTCCTT  
ATTTGCCAGCGGGTTAAGCCGGGAACCTTAAGGATACTGCCAGTGACAAACTGGA  
GGAAGGCGGGGACGACGTCAAGTCATCATGGCCCTTACGACCAGGGCTACACACG  
TGCTACAATGGTCGGTACAAAGGGTTGCTACCTAGCGATAGGATGCTAATCTCAAA  
AAGCCGATCGTAGTCCGGATTGGAGTCTGCAACTCGACTCCATGAAGTCGGAATCG  
CTAGTAATCGCGGATCAGAATGCCGCGGTGAATACGTTCCCGGGCCTTGTACACAC  
CGCCCGTCACACCATGGGAATTTGTTGCACCAGAAGTAGGTAGTCTAACC GCAAGG  
AGGACGCTTACCACGGTGTGGCCGATGACTGGGGTGAAGTCGTAACAAGGTAGCC  
GTAGGGGAACCTGCGGCTGGATCACCTCCTT

>Acinetobacter johnsonii Mannheim 3865/60 (NR044975)

CCTGGCTCAGATTGAACGCTGGCGGCAGGCTTAACACATGCAAGTCGAGCGGGGA  
GAGGTAGCTTGCTACCTAACCTAGCGGGCGGACGGGTGAGTAATGCTTAGGAATCTG  
CCTATTAGTGGGGGACAACATTCCGAAAGGAATGCTAATACCGCATAACGTCCTACG  
GGNGAAAGCAGGGGATCTTCGGACCTTGCGCTAATAGATGAGCCTAAGTCAGATT  
AGCTAGTTGGTGGGGTAAAGGCCTACCAAGGCGACGATCTGTAGCGGGTCTGAGA  
GGATGATCCGCCACACTGGGACTGAGACACGGCCCAGACTCCTACGGGAGGCAGC  
AGTGGGGAATATTGGACAATGGGCGGAAGCCTGATCCAGCCATGCCGCGTGTGTG  
AAGAAGGCCTTTTGGTTGTAAAGCACTTTAAGCGAGGAGGAGGCTACTTGGATTAA  
TACTCTAGGATAGTGGACGTTACTCGCAGAATAAGCACCCGGCTAACTCTGTGCCAG  
CAGCCGCGGTAATACAGAGGGTGGCAGCGTTAATCGGATTTACTGGGCGTAAAGC  
GTGCGTAGGCGGCTTTTTAAGTCGGATGTGAAATCCCTGAGCTTAACTTAGGAATT  
GCATTCGATACTGGGAAGCTAGAGTATGGGAGAGGATGGTAGAATTCAGGTGTA  
GCGGTGAAATGCGTAGAGATCTGGAGGAATACCGATGGCGAAGGCAGCCATCTGG  
CCTAATACTGACGCTGAGGTACGAAAGCATGGGGAGCAAACAGGATTAGATACCC  
TGGTAGTCCATGCCGTAACGATGTCTACTAGCCGTTGGGGCCTTTGAGGCTTTAG  
TGGCGCAGCTAACGCGATAAGTAGACCGCCTGGGGAGTACGGTCGCAAGACTAAA  
ACTCAAATGAATTGACGGGGGCCCGCACAAAGCGGTGGAGCATGTGGTTTAAATTCG  
ATGCAACGCGAAGAACCTTACCTGGTCTTGACATAGTAAGAACTTTCAGAGATGG  
ATTGGTGCCTTCGGGAACCTTACATACAGGTGCTGCATGGCTGTCGTCAGCTCGTGT  
CGTGAGATGTTGGGTTAAGTCCCGCAACGAGCGCAACCCTTTTCCTTATTTGCCAG  
CGGGTTAAGCCGGGAACCTTTAAGGATACTGCCAGTGACAAACTGGAGGAAGGCGG  
GGACGACGTCAAGTCATCATGGCCCTTACGACCAGGGCTACACACGTGCTACAATG

GTCGGTACAAAGGGTTGCTACCTAGCGATAGGATGCTAATCTCAAAAAGCCGATCG  
TAGTCCGGATTGGAGTCTGCAACTCGACTCCATGAAGTCGGAATCGCTAGTAATCG  
CGGATCAGAATGCCGCGGTGAATACGTTCCCGGGNCTTGTACACACCCGCCGTCAC  
ACCATGGGAGTTTGTTCACCAGAAGTAG

>*Acinetobacter haemolyticus* ATCC 17906 (NR117622)

AGAGTTTGTTCATGGCTCAGATTGAACGCTGGCGGCAGGCTTAACACATGCAAGTC  
GAGCGGGGAAGGGTAGCTTGCTACCTAACCTAGCGGCGGACGGGTGAGTAATGCT  
TAGGAATCTGCCTATTAGTGGGGGACAACATTCCGAAAGGAATGCTAATACCGCAT  
ACGTCCTACGGGAGAAAGCAGGGGATCTTCGGACCTTGCGCTAATAGATGAGCCT  
AAGTCGGATTAGCTAGTTGGTGGGGTAAAGGCCTACCAAGGCGACGATCTGTAGC  
GGGTCTGAGAGGATGATCCGCCACACTGGGACTGAGACACGGCCCAGACTCCTAC  
GGGAGGCAGCAGTGGGGAATATTGGACAATGGGCGGAAGCCTGATCCAGCCATGC  
CGCGTGTGTGAAGAAGGCCTTTTGGTTGTAAAGCACTTTAAGCGAGGAGGAGGCTA  
CTCTAGTTAATACCTAGAGATAGTGGACGTTACTCGCAGAATAAGCACCCGGCTAAC  
TCTGTGCCAGCAGCCGCGGTAATACAGAGGGTGCGAGCGTTAATCGGATTTACTGG  
GCGTAAAGCGTGCGTAGGCGGCTGATTAAGTCGGATGTGAAATCCCTGAGCTTAAC  
TTAGGAATTGCATTCGATACTGGTCAGCTAGAGTATGGGAGAGGATGGTAGAATTC  
CAGGTGTAGCGGTGAAATGCGTAGAGATCTGGAGGAATACCGATGGCGAAGGCAG  
CCATCTGGCCTAATACTGACGCTGAGGTACGAAAGCATGGGGAGCAAACAGGATT  
AGATACCCTGGTAGTCCATGCCGTAACGATGTCTACTAGCCGTTGGGGCCTTTGA  
GGCTTTAGTGGCGCAGCTAACGCGATAAGTAGACCGCCTGGGGAGTACGGTCGCA  
AGACTAAAACCTCAAATGAATTGACGGGGGCCCGCACAAGCGGTGGAGCATGTGGT  
TTAATTGATGCAACGCGAAGAACCTTACCTGGTCTTGACATAGTAAGAACTTTCC  
AGAGATGGATTGGTGCCTTCGGGAACCTACATACAGGTGCTGCATGGCTGTCGTC  
GCTCGTGTGAGATGTTGGGTAAAGTCCCGCAACGAGCGCAACCCTTTTCCTTAT  
TTGCCAGCGGGTTAAGCCGGGAACCTTAAGGATACTGCCAGTGACAACTGGAGG  
AAGGCGGGGACGACGTCAAGTCATCATGGCCCTTACGACCAGGGCTACACACGTG  
CTACAATGGTTCGGTACAAAGGGTTGCTACCTAGCGATAGGATGCTAATCTCAAAA  
GCCGATCGTAGTCCGGATTGGAGTCTGCAACTCGACTCCATGAAGTCGGAATCGCT  
AGTAATCGCGGATCAGAATGCCGCGGTGAATACGTTCCCGGGCCTTGTACACACCG  
CCCGTCACACCATGGGAGTTTGTTCACCAGAAGTAGGTAGTCTAACCGTAAGGAG  
GACGCTTACCACGGTGTGGCCGATGACTGGGGTGAAGTCGTAACAAGGTAGCCGT  
AGGGGAACCTGCGGCTGGATCACCTCCTT

>*Acinetobacter oleivorans* DR1 (NR102814)

AACTGAAGAGTTTGTATCATGGCTCAGATTGAACGCTGGCGGCAGGCTTAACACATG  
CAAGTCGAGCGGAGAGAGGTAGCTTGCTACTGATCTTAGCGGCGGACGGGTGAGT  
AATGCTTAGGAATCTGCCTATTAGTGGGGGACAACATTTTCGAAAGGAATGCTAATA  
CCGCATACGTCCTACGGGAGAAAGCAGGGGATCTTCGGACCTTGCGCTAATAGATG  
AGCCTAAGTCGGATTAGCTAGTTGGTGGGGTAAAGGCCTACCAAGGCGACGATCT  
GTAGCGGGTCTGAGAGGATGATCCGCCACACTGGGACTGAGACACGGCCCAGACT  
CCTACGGGAGGCAGCAGTGGGGAATATTGGACAATGGGCGGAAGCCTGATCCAGC  
CATGCCGCGTGTGTGAAGAAGGCCTTATGGTTGTAAAGCACTTTAAGCGAGGAGG  
AGGCTACTTTAGTTAATACCTAGAGATAGTGGACGTTACTCGCAGAATAAGCACCG  
GCTAACTCTGTGCCAGCAGCCGCGGTAATACAGAGGGTGAAGCGTTAATCGGATT  
TACTGGGCGTAAAGCGCGCGTAGGCGGCTAATTAAGTCAAATGTGAAATCCCCGA  
GCTTAACTTGGGAATTGCATTCGATACTGGTTAGCTAGAGTGTGGGAGAGGATGGT  
AGAATTCAGGTGTAGCGGTGAAATGCGTAGAGATCTGGAGGAATACCGATGGCG  
AAGGCAGCCATCTGGCCTAACACTGACGCTGAGGTGCGAAAGCATGGGGAGCAA  
CAGGATTAGATAACCCTGGTAGTCCATGCCGTAACGATGTCTACTAGCCGTTGGGG  
CCTTTGAGGCTTTAGTGGCGCAGCTAACGCGATAAGTAGACCGCCTGGGGAGTACG  
GTCGCAAGACTAAAACCTCAAATGAATTGACGGGGGCCCGCACAAGCGGTGGAGCA



TGTGGTTTAATTTCGATGCAACGCGAAGAACCCTTACCTGGCCTTGACATAGTAAGAA  
CTTTCCAGAGATGGATTGGTGCCTTCGGGAACCTTACATACAGGTGCTGCATGGCTG  
TCGTCAGCTCGTGTGCTGAGATGTTGGGTAAAGTCCCGCAACGAGCGCAACCCTTT  
TCCTTATTTGCCAGCGAGTAATGTCGGGAACCTTAAAGGATACTGCCAGTGACAAAC  
TGGAGGAAGGCGGGGACGACGTCAAGTCATCATGGCCCTTACGGCCAGGGCTACA  
CACGTGCTACAATGGTTCGGTACAAAGGGTTGCTACCTAGCGATAGGATGCTAATCT  
CAAAAAGCCGATCGTAGTCCGGATTGGAGTCTGCAACTCGACTCCATGAAGTCGGA  
ATCGCTAGTAATCGCGGATCAGAATGCCGCGGTGAATACGTTCCCGGGCCTTGTAC  
ACACCGCCCGTACACCATGGGAGTTTGTGTCACCAGAAGTAGCTAGCCTAACTGC  
AAAGAGGGCGGTTACCACGGTGTGGCCGATGACTGGGGTGAAGTCGTAACAAGGT  
AGCCGTAGGGGAACCTGCGGCTGGATCACCTCCTTA

>Acinetobacter pittii ATCC 19004 (NR117621)

AGAGTTTGATCATGGCTCAGATTGAACGCTGGCGGCAGGCTTAACACATGCAAGTC  
GAGCGGAGAGAGGTAGCTTGCTACTGATCTTAGCGGGCGGACGGGTGAGTAATGCT  
TAGGAATCTGCCTATTAGTGGGGGACAACATTTTCGAAAGGAATGCTAATACCGCAT  
ACGTCCTACGGGAGAAAGCAGGGGATCTTCGGACCTTGCCTAATAGATGAGCCT  
AAGTCGGATTAGCTAGTTGGTGGGGTAAAGGCCTACCAAGGCGACGATCTGTAGC  
GGGTCTGAGAGGATGATCCGCCACACTGGGACTGAGACACGGCCAGACTCCTAC  
GGGAGGCAGCAGTGGGGAATATTGGACAATGGGCGCAAGCCTGATCCAGCCATGC  
CGCGTGTGTGAAGAAGGCCTTATGGTTGTAAAGCACTTTAAGCGAGGAGGAGGCT  
ACTTTAGTTAATACCTAGAGATAGTGGACGTTACTCGCAGAATAAGCACCGGCTAA  
CTCTGTGCCAGCAGCCGCGGTAATACAGAGGGTGAAGCGTTAATCGGATTTACTG  
GGCGTAAAGCGCGCGTAGGCGGCTAATTAAGTCAAATGTGAAATCCCCGAGCTTA  
ACTTGGGAATTGCATTCGATACTGGTTAGCTAGAGTGTGGGAGAGGATGGTAGAAT  
TCCAGGTGTAGCGGTGAAATGCGTAGAGATCTGGAGGAATACCGATGGCGAAGGC  
AGCCATCTGGCCTAACACTGACGCTGAGGTGCGAAAGCATGGGGAGCAAACAGGA  
TTAGATACCCTGGTAGTCCATGCCGTAAACGATGTCTACTAGCCGTTGGGGCCTTT  
GAGGCTTTAGTGGCGCAGCTAACGCGATAAGTAGACCGCCTGGGGAGTACGGTGC  
CAAGACTAAAACCTCAAATGAATTGACGGGGGCCCCGCACAAGCGGTGGAGCATGTG  
GTTTAATTCGATGCAACGCGAAGAACCCTTACCTGGCCTTGACATAGTAAGAACCTT  
CCAGAGATGGATTGGTGCCTTCGGGAACCTTACATACAGGTGCTGCATGGCTGTCGT  
CAGCTCGTGTGCTGAGATGTTGGGTAAAGTCCCGCAACGAGCGCAACCCTTTTCT  
TATTTGCCAGCGAGTAATGTCGGGAACCTTAAAGGATACTGCCAGTGACAACTGGA  
GGAAGGCGGGGACGACGTCAAGTCATCATGGCCCTTACGGCCAGGGCTACACACG  
TGCTACAATGGTTCGGTACAAAGGGTTGCTACCTAGCGATAGGATGCTAATCTCAA  
AAGCCGATCGTAGTCCGGATTGGAGTCTGCAACTCGACTCCATGAAGTCGGAATCG  
CTAGTAATCGCGGATCAGAATGCCGCGGTGAATACGTTCCCGGGCCTTGTACACAC  
CGCCCGTACACCATGGGAGTTTGTGTCACCAGAAGTAGCTAGCCTAACTGCAAAG  
AGGGCGGTTACCACGGTGTGGCCGATGACTGGGGTGAAGTCGTAACAAGGTAGCC  
GTAGGGGAACCTGCGGCTGGATCACCTCCTT

>Acinetobacter baumannii DSM 30007 (NR117677)

ATTGAACGCTGGCGGCAGGCTTAACACATGCAAGTCGAGCGGGGGAAGGTAGCTT  
GCTACCGGACCTAGCGGCGGACGGGTGAGTAATGCTTAGGAATCTGCCTATTAGTG  
GGGGACAACATCTCGAAAGGGATGCTAATACCGCATACTCCTACGGGAGAAAGC  
AGGGGATCTTCGGACCTTGCCTAATAGATGAGCCTAAGTCGGATTAGCTAGTTGG  
TGGGGTAAAGGCCTACCAAGGCGACGATCTGTAGCGGGTCTGAGAGGATGATCCG  
CCACACTGGGACTGAGACACGGCCAGACTCCTACGGGAGGCAGCAGTGGGGAAAT  
ATTGGACAATGGGGGGAACCCTGATCCAGCCATGCCGCGTGTGTGAAGAAGGCCT  
TATGGTTGTAAAGCACTTTAAGCGAGGAGGAGGCTACTTTAGTTAATACCTAGAGA  
TAGTGGACGTTACTCGCAGAATAAGCACCGGCTAACTCTGTGCCAGCAGCCGCGGT  
AATACAGAGGGTGCAGCGTTAATCGGATTTACTGGGCGTAAAGCGTGCGTAGGC

GGCTTATTAAGTCGGATGTGAAATCCCCGAGCTTAACTTGGGAATTGCATTCGATA  
CTGGTGAGCTAGAGTATGGGAGAGGATGGTAGAATTCCAGGTGTAGCGGTGAAAT  
GCGTAGAGATCTGGAGGAATACCGATGGCGAAGGCAGCCATCTGGCCTAATACTG  
ACGCTGAGGTACGAAAGCATGGGGAGCAAACAGGATTAGATACCCTGGTAGTCCA  
TGCCGTAAACGATGTCTACTAGCCGTTGGGGCCTTTGAGGCTTTAGTGGCGCAGCT  
AACGCGATAAGTAGACCGCCTGGGGAGTACGGTCGCAAGACTAAACTCAAATGA  
ATTGACGGGGGCCCGCACAAAGCGGTGGAGCATGTGGTTTAATTTCGATGCAACGCG  
AAGAACCTTACCTGGCCTTGACATACTAGAACTTTCCAGAGATGGATTGGTGCCT  
TCGGGAATCTAGATAACAGGTGCTGCATGGCTGTCGTCAGCTCGTGTCTGAGATGT  
TGGGTTAAGTCCCAGCAACGAGCGCAACCCTTTTCCTTACTTGCCAGCATTTCGGATG  
GGAACTTTAAGGATACTGCCAGTGACAACTGGAGGAAGGCGGGGACGACGTCAA  
GTCATCATGGCCCTTACGGCCAGGGCTACACACGTGCTACAATGGTCGGTACAAAG  
GGTTGCTACACAGCGATGTGATGCTAATCTCAAAAAGCCGATCGTAGTCCGGATTG  
GAGTCTGCAACTCGACTCCATGAAGTCGGAATCGCTAGTAATCGCGGATCAGAATG  
CCGCGGTGAATACGTTCCCGGGCCTTGTACACACCGCCCGTCACACCATGGGAGTT  
TGTTGCACCAGAAGTAGCTAGCCTAACTGCAAAGAGGGCGGTTACCACGGTGTGG  
CCGATGACTGGGGTGAAGTCGTAACAAGGTAGCCGTAGGGGAACCTGCGGCTGGA  
TCACCTCCTTTCTATA

>Acinetobacter junii Mannheim 2723/59 (NR119360)

CCTGGCTCAGATTGAACGCTGGCGGCAGGCTTAACACATGCAAGTCGAGCGGAGA  
TGAGGTGCTTGCACCTTATCTTAGCGGCGGACGGGTGAGTAATGCTTAGGAATCTG  
CCTATTAGTGGGGGACAACATTCGAAAGGAATGCTAATACCGCATAACGTCCTACG  
GGAGAAAGCAGGGGATCTTCGGACCTTGCCTAATAGATGAGCCTAAGTCGGATT  
AGCTAGTTGGTGGGGTAAAGGCCTACCAAGGCGACGATCTGTAGCGGGTCTGAGA  
GGATGATCCGCCACACTGGGACTGAGACACGGCCAGACTCCTACGGGAGGCAGC  
AGTGGGGAATATTGGACAATGGGGGGAACCCTGATCCANCCATGCCGCGTGTGTG  
AAGAAGGCCTTATGGTTGTAAGCACTTTAAGCGAGGAGGAGGCTACTGAGACTA  
ATACTCTTGGATAGTGGACGTTACTCGCAGAATAAGCACCGGCTAACTCTGTGCCA  
GCAGCCGCGGTAATACAGAGGGTGCAGCGTTAATCGGATTTACTGGGCGTAAAG  
CGTGCGTAGGGCGGCTTTTTAAGTCGGATGTGAAATCCCCGAGCTTAACTTGGGAAT  
TGCATTCGATACTGGGAAGCTAGAGTATGGGAGAGGATGGTAGAATTCCAGGTGT  
AGCGGTGAAATGCGTAGAGATCTGGAGGAATACCGATGGCGAAGGCAGCCATCTG  
GCCTAATACTGACGCTGAGGTACGAAAGCATGGGGAGCAAACAGGATTAGATAACC  
CTGGTAGTCCATGCCGTAAACGATGTCTACTAGCCGTTGGGGCCTTTGAGGCTTTA  
GTGGCGCAGCTAACGCGATAAGTAGACCGCCTGGGGAGTACGGTCGCAAGACTAA  
AACTCAAATGAATTGACGGGGGCCCGCACAAAGCGGTGGAGCATGTGGTTTAATTC  
GATGCAACGCGAAGAACCTTACCTGGCCTTGACATACTAGAACTTTCCAGAGATG  
GATTGGTGCCTTCGGGAATCTAGATAACAGGTGCTGCATGGCTGTCGTCAGCTCGTG  
TCGTGAGATGTTGGGTTAAGTCCCGCAACGAGCGCAACCCTTTTCCTTACTTGCCA  
GCATTTCCGGATGGGAACTTTAAGGATACTGCCAGTGACAAACTGGAGGAAGGCGG  
GGACGACGTCAAGTCATCATGGCCCTTACGGCCAGGGCTACACACGTGCTACAATG  
GTCGGTACAAAGGGTTGCTACACAGCGATGTGATGCTAATCTCAAAAAGCCGATCG  
TAGTCCGGATTGGAGTCTGCAACTCGACTCCATGAAGTCGGAATCGCTAGTAATCG  
CGGATCAGAATGCCGCGGTGAATACGTTCCCGGGCCTTGTACACACCGCCCGTCAC  
ACCATGGGAGTTTGTGACCAGAAGTAG

>Acinetobacter septicus AK001 (NR116071)

AGAGTTTGATCCTGGCTCAGATTGAACGCTGGCGGCAGGCTTAACACATGCAAGTC  
GAGCGGAGATGAGGTGCTTGCACCTTATCTTAGCGGCGGACGGGTGAGTAATACTT  
AGGAATCTGGCTATTAGTGGGGGACAACATTTCCGAAAGGGATGCTAATACCGCAT  
ACGTCCTACGGGAGAAAGCAGGGGATCTTCGGACCTTGCCTAATAGATGAGCCT  
AAGTCGGATTAGCTAGTTGGTGGGGTAAAGGCCTACCAAGGCGACGATCTGTAGC

GGGTCTGAGAGGATGATCCGCCACACTGGGACTGAGACACGGCCCAGACTCCTAC  
GGGAGGCAGCAGTGGGGAATATTGGACAATGGGGGGAACCCTGATCCAGCCATGC  
CGCGTGTGTGAAGAAGGCCTTATGGTTGTAAAGCACTTTAAGCGAGGAGGAGGGT  
ACTGGTATTAATACTACCAGCTACTGGACGTTACTCGCAGAATAAGCACCGGCTAA  
CTCTGTGCCAGCAGCCGCGGTAATACAGAGGGTGCAGCGTTAATCGGATTTACTG  
GGCGTAAAGCGTGCGTAGGCGGCTAATTGAGTCGGATGTGAAATCCCCGAGCTTA  
ACTTGGGAATTGCATTCGATACTGGTTAGCTAGAGTGTGGGAGAGGATGGTAGAAT  
TCCAGGTGTAGCGGTGAAATGCGTAGAGATCTGGAGGAATACCGATGGCGAAGGC  
AGCCATCTGGCCTAACACTGACGCTGAGGTACGAAAGCATGGGGAGCAAACAGGA  
TTAGATAACCCTGGTAGTCCATGCCGTAAACGATGTCTACTAGCCGTTGGTCTCTTTG  
AGGGATTAGTGGCGCAGCTAACGCGATAAGTAGACCGCCTGGGGAGTACGGTCGC  
AAGACTAAAAC TCAAATGAATTGACGGGGGCCCGCACAAAGCGGTGGAGCATGTGG  
TTAATTCGATGCAACGCGAAGAACCTTACCTGGTCTTGACATAGTAAGA ACTTTC  
CAGAGATGGATTGGTGCCTTCGGGA ACTTACATACAGGTGCTGCATGGCTGTCTGC  
AGCTCGTGTCTGAGATGTTGGGTTAAGTCCC GCAACGAGCGCAACCCTTTTCCTT  
ATTTGCCAGCACTTTGGGTGGGA ACTTTAAGGATACTGCCAGTGACAACTGGAGG  
AAGGCGGGGACGACGTCAAGTCATCATGGCCCTTACGACCAGGGCTACACACGTG  
CTACAATGGTTCGGTACAAAGGGTTGCTACCTAGCGATAGGATGCTAATCTCAAAAA  
GCCGATCGTAGTCCGGATTGGAGTCTGCAACTCGACTCCATGAAGTCGGAATCGCT  
AGTAATCGCGGATCAGAATGCCGCGGTGAATACGTTCCC GGGCCTTGTACACACCG  
CCCGTCACACCATGGGAGTTTGTGTCACCAGAAGTGGATAGTCTAACTGCAAAGAG  
GACGTTACACCAGGTGTGGCCGATGACTGGGGTGAAGTCGTAACAAGGTAGCCGT  
AGGGGAACCTGCGGCTGGATCACCTCCTT

>Brevundimonas diminuta NBRC 12697 (NR113602)

AGCGAACGCTGGCGGCAGGCCTAACACATGCAAGTCGAACGGACCCTTCGGGGTT  
AGTGGCGGACGGGTGAGTAACACGTGGGAACGTGCCTTTAGGTTTCGGAATAGCTC  
CTGGAAACGGGTGGTAATGCCGAATGTGCCCTTCGGGGGAAAGATTTATCGCCTTT  
AGAGCGGCCCGCGTCTGATTAGCTAGTTGGTGAGGTAACGGCTACCAAGGCGAC  
GATCAGTAGCTGGTCTGAGAGGATGACCAGCCACACTGGGACTGAGACACGGCCC  
AGACTCCTACGGGAGGCAGCAGTGGGGAATCTTGCGCAATGGGGCGAAAGCCTGAC  
GCAGCCATGCCGCGTGAATGATGAAGGTCTTAGGATTGTAAAATTCTTTCACCGGN  
GACGATAATGACGGTACCCGGAGAAGAAGCCCCGGCTAACTTCGTGCCAGCAGCC  
GCCGTAATACGAAGGGGGCTAGCGTTGCTCGGAATTA CTGGGCGTAAAGGGCGCG  
TAGGCGGATCGTTAAGTCAGAGGTGAAATCCCAGGGCTCAACCCTGGA ACTGCCTT  
TGATACTGGCGATCTTGAGTATGAGAGAGGTATGTGGA ACTCCGAGTGTAGAGGTG  
AAATTCGTAGATATTCGGAAGAACACCAGTGGCGAAGGCGACATACTGGCTCATT  
ACTGACGCTGAGGCGCGAAAGCGTGGGGAGCAAACAGGATTAGATAACCCTGGTAG  
TCCACGCCGTAAACGATGATTGCTAGTTGTCGGGCTGCATGCAGTTCGGTGACGCA  
GCTAACGCATTAAGCAATCCGCCTGGGGAGTACGGTTCGCAAGATTA AAACTCAA  
GGAATTGACGGGGGCCCGCACAAAGCGGTGGAGCATGTGGTTTAATT CGAAGCAAC  
GCCGAGAACCTTACCACCTTTTGACATGCCTGGACC GCCACGGAGACGTGGCTTTC  
CCTTCGGGGACTAGGACACAGGTGCTGCATGGCTGTCTCAGCTCGTGTCTGAGA  
TGTTGGGTTAAGTCCC GCAACGAGCGCAACCCTCGCCATTAGTTGCCATCATTTAG  
TTGGGA ACTCTAATGGGACTGCCGGTGTCTAAGCCGGAGGAAGGTGGGGATGACGT  
CAAGTCCTCATGGCCCTTACAGGGTGGGCTACACACGTGCTACAATGGCAACTACA  
GAGGGTTAATCCTTAAAAGTTGTCTCAGTTCGGATTGTCTCTGCAACTCGAGGGC  
ATGAAGTTGGAATCGCTAGTAATCGCGGATCAGCATGCCGCGGTGAATACGTTCCC  
GGCCTTGTACACACCGCCCGTCACACCATGGGAGTTGGTTCTACCCGAAGGCGGT  
GCGCTAACCAGCAATGGAGGCAGCCGACCACGGTAGGGTCAGCGACTGGGGTGAA  
G

>Brevundimonas diminuta LMG 2089 (NR114708)

AGCGAACGCTGGCGGCAGGCCTAACACATGCAAGTCGAACGGACCCTTCGGGGTT  
AGTGGCGGACGGGTGAGTAACACGTGGGAACGTGCCTTTAGGTTTCGGAATAGCTC  
CTGGAAACGGGTGGTAATGCCGAATGTGCCCTTCGGGGGAAAGATTTATCGCCTTT  
AGAGCGGCCCGCGTCTGATTAGCTAGTTGGTGAGGTAACGGCTCACCAAGGCGAC  
GATCAGTAGCTGGTCTGAGAGGATGACCAGCCACACTGGGACTGAGACACGGCCC  
AGACTCCTACGGGAGGCAGCAGTGGGGAATCTTGCGCAATGGGCGAAAGCCTGAC  
GCAGCCATGCCGCGTGAATGATGAAGGTCTTAGGATTGTAAAATTCTTTACCGGG  
GACGATAATGACGGTACCCGGAGAAGAAGCCCCGGCTAACTTCGTGCCAGCAGCC  
GCGGTAATACGAAGGGGGCTAGCGTTGCTCGGAATTAAGGGCGTAAAGGGGCGCG  
TAGGCGGATCGTTAAGTCAGAGGTGAAATCCCAGGGCTCAACCCTGGAAGTGCCTT  
TGATACTGGCGATCTTGAGTATGAGAGAGGTATGTGGAAGTCCGAGTGTAGAGGTG  
AAATTCGTAGATATTCGGAAGAACACCAGTGGCGAAGGCGACATACTGGCTCATT  
ACTGACGCTGAGGCGCGAAAGCGTGGGGAGCAAACAGGATTAGATACCCTGGTAG  
TCCACGCCGTAAACGATGATTGCTAGTTGTTCGGGCTGCATGCAGTTCGGTGACGCA  
GCTAACGCATTAAGCAATCCGCCTGGGGAGTACGGTTCGCAAGATTAAGAACTCAA  
GGAATTGACGGGGGCCCGCACAAAGCGGTGGAGCATGTGGTTTAATTCGAAGCAAC  
GCGCAGAACCTTACCACCTTTTGACATGCCTGGACCGCCACGGAGACGTGGCTTTC  
CCTTCGGGGACTAGGACACAGGTGCTGCATGGCTGTCGTCAGCTCGTGTCTGAGA  
TGTTGGGTTAAGTCCCGCAACGAGCGCAACCCTCGCCATTAGTTGCCATCATTAG  
TTGGGAAGTCTAATGGGACTGCCGGTGTAAAGCCGGAGGAAGGTGGGGATGACGT  
CAAGTCCTCATGGCCCTTACAGGGTGGGCTACACACGTGCTACAATGGCAACTACA  
GAGGGTTAATCCTTAAAAGTTGTCTCAGTTCGGATTGTCTCTGCAACTCGAGGGC  
ATGAAGTTGGAATCGCTAGTAATCGCGGATCAGCATGCCGCGGTGAATACGTTCCC  
GGCCTTGTACACACCGCCCGTCACACCATGGGAGTTGGTTCTACCCGAAGGCGGT  
GCGCTAACAGCAATGGAGGCAGCCGACCACCGTAGGGTCAGCGACTGGGGTGAA  
GTCGTAACAAGGTAGCCGTAGGGGAACCTGC

>Brevundimonas staleyii FWC43 (NR114710)

AGCGAACGCTGGCGGCAGGCCTAACACATGCAAGTCGAACGGACCCTTCGGGGTT  
AGTGGCGGACGGGTGAGTAACACGTGGGAACGTGCCTTTAGGTTTCGGAATAGCTC  
CTGGAAACGGGTGGTAATGCCGAATGTGCCCTTCGGGGGAAAGATTTATCGCCTTT  
AGAGCGGCCCGCGTCTGATTAGCTAGTTGGTGAGGTAAGGCTCACCAAGGCGAC  
GATCAGTAGCTGGTCTGAGAGGATGACCAGCCACATTGGGACTGAGACACGGCCC  
AACTCCTACGGGAGGCAGCAGTGGGGAATCTTGCGCAATGGGCGAAAGCCTGAC  
GCAGCCATGCCGCGTGAATGATGAAGGTCTTAGGATTGTAAAATTCTTTACCGGG  
GACGATAATGACGGTACCCGGAGAAGAAGCCCCGGCTAACTTCGTGCCAGCAGCC  
GCGGTAATACGAAGGGGGCTAGCGTTGCTCGGAATTAAGGGCGTAAAGGGGAGCG  
TAGGCGGACATTTAAGTCAGGGGTGAAATCCCAGAGCTCAACTCTGGAAGTGCCTT  
TGATACTGGGTGTCTTGAGTGTGATAGAGGTAAGTGGAACTCCGAGTGTAGAGGTG  
AAATTCGTAGATATTCGGAAGAACACCAGTGGCGAAGGCGACTTACTGGATCATT  
CTGACGCTGAGGCTCGAAAGCGTGGGGAGCAAACAGGATTAGATACCCTGGTAGT  
CCACGCCGTAAACGATGATTGCTAGTTGTTGGGGTGTTTACACCTCGGTGACGCAG  
CTAACGCATTAAGCAATCCGCCTGGGGAGTACGGTTCGCAAGATTAAGAACTCAAAG  
GAATTGACGGGGGCCCGCACAAAGCGGTGGAGCATGTGGTTTAATTCGAAGCAACG  
CGCAGAACCTTACCACCTTTTGACATGCCTGGACCGCCAGAGAGATCTGGCTTTC  
CCTTCGGGGACTAGGACACAGGTGCTGCATGGCTGTCGTCAGCTCGTGTCTGAGAT  
GTTGGGTTAAGTCCCGCAACGAGCGCAACCCTCGCCATTAGTTGCCATCATTAGT  
TGGGAAGTCTAATGGGACTGCCGGTGTAAAGCCGGAGGAAGGTGGGGATGACGTC  
AAGTCCTCATGGCCCTTACAGGGTGGGCTACACACGTGCTACAATGGCAACTACAG  
AGGGTTAATCCTTAAAAGTTGTCTCAGTTCGGATTGTCTCTGCAACTCGAGGGCA  
TGAAGTTGGAATCGCTAGTAATCGCGGATCAGCATGCCGCGGTGAATACGTTCCC  
GGCCTTGTACACACCGCCCGTCACACCATGGGAGTTGGTTCTACCCGAAGGCGATG

CGCTAACCGCAAGGAGGCAGTCGACCACGGTAGGGTCAGCGACTGGGGTGAAGTC  
GTAACAAGGTAGCCGTAGGGGAACCTGC

>Brevundimonas bullata IAM 13153 (NR025831)

GAGCGAACGCTGGCGGCAGGCCTAACACATGCAAGTCGAACGGACCCTTCGGGGT  
TAGTGGCGGACGGGTGAGTAACACGTGGGAACGTGCCTTTAGGTTTCGGAATAGCTC  
CTGGAAACGGGTGGTAATGCCGAATGTGCCCTTCGGGGGAAAGATTTATCGCCTTT  
AGAGCGGCCCGCGTCTGATTAGCTAGTTGGTGAGGTAATGGCTACCAAGGCGAC  
GATCAGTAGCTGGTCTGAGAGGATGACCAGCCACATTGGGACTGAGACACGGCCC  
AAACTCCTACGGGAGGCAGCAGTGGGGAATCTTGCGCAATGGGCGAAAGCCTGAC  
GCAGCCATGCCGCGTGAATNATGAAGGTCTTAGGATTGTAAAATCTTTACCGGG  
GACGATAATGACGGTACCCGGAGAAGAAGCCCCGGCTAACTTCGTGCCAGCAGCC  
GCGGTAATACGAAGGGGGCTAGCGTTGCTCGGAATTACTGGGCGTAAAGGGCGCG  
TAGGCGGACATTTAAGTCAGGGGTGAAATCCCAGAGCTCAACTCTGGAAGTGCCTT  
TGATACTGGGTGTCTTGAGTGTGAGAGAGGTATGTGGAAGTCCGAGTGTAGAGGTG  
AAATTCGTAGATATTCGGAAGAACACCAGTGGCGAAGGCGACATACTGGCTCATT  
ACTGACGCTGAGGCGCGAAANNNTGGGGAGCAAACAGGATTAGATACCCTGGTAG  
TCCACGCCGTAAACGATGATTGCTAGTTGTCTGGGCTGCATGCAGTTCGGTGACGCA  
GCTAACGCATTAAGCAATCCGCCTGGGGAGTACGGTCGCAAGATTA AAACTCAA  
GGAATTGACGGGGGGCCCGCACAAAGCGGTGGAGCATGTGGTTTAATTCGAAGCAAC  
GCGCAGAACCTTACCACCTTTTGACATGCCTGGACCGCCAGAGAGATCTGGCTTTC  
TCTTCGGAGACTAGGACACAGGTGCTGCATGGCTGTCTCGTCAGCTCGTGTCTGAGA  
TGTTGGGTTAAGTCCCGCAACGAGCGCAACCCTCGCCATTAGTTGCCATCATTAG  
TTGGGAAGTCTAATGGGACTGCCGGTGTGCTAAGCCGGAGGAAGGTGGGGATGACGT  
CAAGTCCTCATGGCCCTTACAGGGTGGGCTACACACGTGCTACAATGGCGACTACA  
GAGGGTTAATCCTTAAAAGTCGTCTCAGTTCGGATTGTCTCTGCAACTCGAGGGC  
ATGAAGTTGGAATCGCTAGTAATCGCGGATCAGCATGCCGCGGTGAATACGTTCCC  
GGCCTTGTACACACCGCCCCTCACACCATGGGAGTTGGTTCTACCCGAAGGCGAT  
GCGCTAACCCGCAAGGAGGCAGTCGACCACGGTAGGGTCAGCGACTGGGGTGAAG  
TCGTAACAAGGTAGCCNTAGGGGAACC

>Brevundimonas lenta DS-18 (NR044186)

AGCGAACGCTGGCGGCAGGCCTAACACATGCAAGTCGAACGGACCCTTCGGGGTT  
AGTGGCGGACGGGTGAGTAACACGTGGGAACGTGCCTTTAGGTTTCGGAATAGCTC  
CTGGAAACGGGTGGTAATGCCGAATGTGCCCTTCGGGGGAAAGATTTATCGCCTTT  
AGAGCGGCCCGCGTCTGATTAGCTAGTTGGTGAGGTAAGGCTACCAAGGCTAC  
GATCAGTAGCTGGTCTGAGAGGATGACCAGCCACATTGGGACTGAGACACGGCCC  
AAACTCCTACGGGAGGCAGCAGTGGGGAATCTTGCGCAATGGGCGAAAGCCTGAC  
GCAGCCATGCCGCGTGGATGATGAAGGTCTTAGGATTGTAAAATCCTTTACCGGT  
GAAGATAATGACTGTAGCCGGAGAAGAAGCCCCGGCTAACTTCGTGCCAGCAGCC  
GCGGTAATACGAAGGGGGCTAGCGTTGCTCGGAATTACTGGGCGTAAAGGGAGCG  
TAGGCGGACATTTAAGTCAGGGGTGAAATCCCAGAGCTCAACTCTGGAAGTGCCTT  
TGATACTGGGTGTCTTGAGTGTGAGAGAGGTATGTGGAAGTCCGAGTGTAGAGGTG  
AAATTCGTAGATATTCGGAAGAACACCAGTGGCGAAGGCGACATACTGGCTCATT  
ACTGACGCTGAGGCTCGAAAGCGTGGGGAGCAAACAGGATTAGATACCCTGGTAG  
TCCACGCCGTAAACGATGATTGCTAGTTGTCTGGGAAGCTTGCTTCTCGGTGACGCA  
GCTAACGCATTAAGCAATCCGCCTGGGGAGTACGGTCGCAAGATTA AAACTCAA  
GGAATTGACGGGGGGCCCGCACAAAGCGGTGGAGCATGTGGTTTAATTCGAAGCAAC  
GCGCAGAACCTTACCACCTTTTGACATGCCCGGACCGCCACAGAGATGTGGCTTTC  
CCTTCGGGGACTGGGACACAGGTGCTGCATGGCTGTCTCGTCAGCTCGTGTCTGAGA  
TGTTGGGTTAAGTCCCGCAACGAGCGCAACCCTCGCCATTAGTTGCCATCATTAG  
TTGGGAAGTCTAATGGGACTGCCGGTGTGCTAAGCCGGAGGAAGGTGGGGATGACGT  
CAAGTCCTCATGGCCCTTACAGGGTGGGCTACACACGTGCTACAATGGCGACTACA

GAGGGTTAATCCTTAAAAGTCGTCTCAGTTCGGATTGTCCTCTGCAACTCGAGGGC  
ATGAAGTTGGAATCGCTAGTAATCGCGGATCAGCATGCCGCGGTGAATACGTTCCC  
GGCCTTGTACACACCGCCCGTCACACCATGGGAGTTGGTTCTACCCGAAGGCGGT  
GCGCTAACCAGCAATGGAGGCAGCCGACCACGGTAGGGTCAGCGACTGGGGTGAA  
GTCGTAACAAGGTAGCCGTAGGGGAACCTGC

>Acinetobacter ursingii DSM 16037(AIEA01000080)

AGAGTTTGATCATGGCTCAGATTGAACGCTGGCGGCAGGCTTAACACATGCAAGTC  
GAGCGGAGAGAGGTAGCTTGCTACTGATCTTAGCGGCGGACGGGTGAGTAATACT  
TAGGAATCTGGCTATTAGTGGGGGACAACATTTTCGAAAGGGATGCTAATACCGCAT  
ACGTCCTACGGGAGAAAGCAGGGGATCTTCGGACCTTGCCTAATAGATGAGCCT  
AAGTCGGATTAGCTAGTTGGTGGGGTAAAGGCCTACCAAGGCGACGATCTGTAGC  
GGGTCTGAGAGGATGATCCGCCACACTGGGACTGAGACACGGCCAGACTCCTAC  
GGGAGGCAGCAGTGGGGAATATTGGACAATGGGGGGAACCCTGATCCAGCCATGC  
CGGTGTGTGAAGAAGGCCTTATGGTTGTAAAGCACTTTAAGCGAGGAGGAGGGT  
ACTGGTATTAATACTACCAGGTAAGTGGACGTTACTCGCAGAATAAGCACCGGCTAA  
CTCTGTGCCAGCAGCCGCGGTAATACAGAGGGTGCAGCGTTAATCGGATTTACTG  
GGCGTAAAGCGTGCCTAGGCGGCTAATTGAGTCGGATGTGAAATCCCCGAGCTTA  
ACTTGGGAATTGCATTCGATACTGGTTAGCTAGAGTGTGGGAGAGGATGGTAGAAT  
TCCAGGTGTAGCGGTGAAATGCGTAGAGATCTGGAGGAATACCGATGGCGAAGGC  
AGCCATCTGGCCTAACACTGACGCTGAGGTACGAAAGCATGGGGAGCAAACAGGA  
TTAGATAACCTGGTAGTCCATGCCGTAAACGATGTCTACTAGCCGTTGGTCTCTTTG  
AGGGATTAGTGGCGCAGCTAACGCGATAAGTAGACCGCCTGGGGAGTACGGTCGC  
AAGACTAAAACTCAAATGAATTGACGGGGGCCCGCACAAGCGGTGGAGCATGTGG  
TTAATTCGATGCAACGCGAAGAACCTTACCTGGTCTTGACATAGTAAGAACTTTC  
CAGAGATGGATTGGTGCCTTCGGGAACCTTACATACAGGTGCTGCATGGCTGTCTGC  
AGCTCGTGTCTGAGATGTTGGGTTAAGTCCCAGCAACGAGCGCAACCCTTTTCCTT  
ATTTGCCAGCACTTTGGGTGGGAACTTTAAGGATACTGCCAGTGACAACTGGAGG  
AAGGCGGGGACGACGTCAAGTCATCATGGCCCTTACGACCAGGGCTACACACGTG  
CTACAATGGTTCGGTACAAAGGGTTGCTACCTAGCGATAGGATGCTAATCTCAAAA  
GCCGATCGTAGTCCGGATTGGAGTCTGCAACTCGACTCCATGAAGTCGGAATCGCT  
AGTAATCGCGGATCAGAATGCCGCGGTGAATACGTTCCCAGGCGCTTGTACACACCG  
CCCGTCACACCATGGGAGTTTGTGACCAGAAGTGGATAGTCTAACTGCAAAGAG  
GACGTTACCACGGTGTGGCCGATGACTGGGGTGAAGTCGTAACAAGGTA

>Acinetobacter seifertii LUH 1472 (NR134684)

ATTGAACGCTGGCGGCAGGCTTAACACATGCAAGTCGAGCGGAGAGAGGTAGCTT  
GCTACTGATCTTAGCGGCGGACGGGTGAGTAATGCTTAGGAATCTGCCTATTAGTG  
GGGGACAACATCTCGAAAGGGATGCTAATACCGCATACTCCTACGGGAGAAAGC  
AGGGGATCTTCGGACCTTGCCTAATAGATGAGCCTAAGTCGGATTAGCTAGTTGG  
TGGGGTAAAGGCCTACCAAGGCGACGATCTGTAGCGGGTCTGAGAGGATGATCCG  
CCACACTGGGACTGAGACACGGCCAGACTCCTACGGGAGGCAGCAGTGGGGAAAT  
ATTGGACAATGGGGGGAACCCTGATCCAGCCATGCCGCGTGTGTGAAGAAGGCCT  
TATGGTTGTAAAGCACTTTAAGCGAGGAGGAGGCTACTTTAGTTAATACCTAGAGA  
TAGTGGACGTTACTCGCAGAATAAGCACCGGCTAACTCTGTGCCAGCAGCCGCGGT  
AATACAGAGGGTGAAGCGTTAATCGGATTTACTGGGCGTAAAGCGCGCGTAGGC  
GGCTAATTAAGTCAAATGTGAAATCCCCGAGCTTAACTTGGGAATTGCATTCGATA  
CTGGTTAGCTAGAGTGTGGGAGAGGATGGTAGAATTCCAGGTGTAGCGGTGAAAT  
GCGTAGAGATCTGGAGGAATACCGATGGCGAAGGCAGCCATCTGGCCTAACACTG  
ACGCTGAGGTGCGAAAGCATGGGGAGCAAACAGGATTAGATAACCTGGTAGTCCA  
TGCCGTAAACGATGTCTACTAGCCGTTGGGGCCTTTGAGGCTTTAGTGGCGCAGCT  
AACGCGATAAGTAGACCGCCTGGGGAGTACGGTTCGCAAGACTAAAACTCAAATGA  
ATTGACGGGGGCCCGCACAAGCGGTGGAGCATGTGGTTTAATTCGATGCAACGCG

AAGAACCTTACCTGGCCTTGACATAGTAAGAACTTTCCAGAGATGGATTGGTGCCT  
TCGGGAACCTTACATACAGGTGCTGCATGGCTGTCGTCAGCTCGTGTGAGATGT  
TGGGTTAAGTCCCGCAACGAGCGCAACCCTTTTCCTTATTTGCCAGCGAGTAATGT  
CGGGAACCTTTAAGGATACTGCCAGTGACAACTGGAGGAAGGCGGGGACGACGTC  
AAGTCATCATGGCCCTTACGGCCAGGGCTACACACGTGCTACAATGGTTCGGTACAA  
AGGGTTGCTACACAGCGATGTGATGCTAATCTCAAAAAGCCGATCGTAGTCCGGAT  
TGGAGTCTGCAACTCGACTCCATGAAGTCGGAATCGCTAGTAATCGCGGATCAGAA  
TGCCGCGGTGAATACGTTCCCGGGCCTTGTACACACCGCCCGTCACACCATGGGAG  
TTTGTGACCAGAAGTAGCTAGCCTAACTGCAAAGAGGGGCGGTTACCACGGTGTG  
GCCGATGACTGGGGTG

>*Pseudomonas parafulva* NBRC 16636 (NR113856)

ATTGAACGCTGGCGGCAGGCCTAACACATGCAAGTCGAGCGGATGACGGGAGCTT  
GCTCCTNGATTCAGCGGCGGACGGGTGAGTAATGCCTAGGAATCTGCCTGGTAGTG  
GGGGACAACGTTTCGAAAGGAACGCTAATACCGCATAACGTCCTACGGGAGAAAGC  
AGGGGACCTTCGGGCCTTGCCTATCAGATGAGCCTAGGTCGGATTAGCTTGTTGG  
TGAGGTAATGGCTCACCAAGGCGACGATCCGTAACCTGGTCTGAGAGGATGATCAG  
TCACACTGGAACCTGAGACACGGTCCAGACTCCTACGGGAGGCAGCAGTGGGGAAT  
ATTGGACAATGGGCGAAAGCCTGATCCAGCCATGCCGCGTGTGTGAAGAAGGTCTT  
CGGATTGTAAAGCACTTTAAGTTGGGAGGAAGGGTTGTAGATTAATACTCTGCAAT  
TTTGACGTTACCGACAGAATAAGCACCGGCTAACTCTGTGCCAGCAGCCGCGGTAA  
TACAGAGGGTGCAAGCGTTAATCGGAATTACTGGGCGTAAAGCGCGCGTAGGTGG  
TTTGTAAAGTTGGATGTGAAAGCCCCGGGCTAACCTGGGAACTGCATCCAAAACCT  
GGCAAGCTAGAGTACGGTAGAGGGTGGTGGAAATTCCTGTGTAGCGGTGAAATGC  
GTAGATATAGGAAGGAACACCAGTGGCGAAGGCGACCACCTGGACTGATACTGAC  
ACTGAGGTGCGAAAGCGTGGGGAGCAAACAGGATTAGATACCCTGGTAGTCCACG  
CCGTAAACGATGTCAACTAGCCGTTGGAATCCTTGAGATTTTAGTGGCGCAGCTAA  
CGCATTAAAGTTGACCGCCTGGGGAGTACGGCCGCAAGGTTAAAACCTCAAATGAATT  
GACGGGGGCCCCGCACAAGCGGTGGAGCATGTGGTTTAATTCGAAGCAACGCGAAG  
AACCTTACCAGGCCTTGACATGCAGAGAACTTTCCAGAGATGGATTGGTGCCTTCG  
GGAACCTCTGACACAGGTGCTGCATGGCTGTCGTCAGCTCGTGTGAGATGTTGG  
GTTAAGTCCCGTAACGAGCGCAACCCTTGTCTTAGTTACCAGCACGTTATGGTGG  
GCACTCTAAGGAGACTGCCGGTGACAAACCGGAGGAAGGTGGGGATGACGTCAAG  
TCATCATGGCCCTTACGGCCTGGGCTACACACGTGCTACAATGGTTCGGTACAGAGG  
GTTGCCAAGCCGCGAGGTGGAGCTAATCTCACAAAACCGATCGTAGTCCGGATCGC  
AGTCTGCAACTCGACTGCGTGAAGTCGGAATCGCTAGTAATCGCGAATCAGAATGT  
CGCGGTGAATACGTTCCCGGGCCTTGTACACACCGCCCGTCACACCATGGGAGTGG  
GTTGCACCAGAAGTAGCTAGTCTAACCTTCGGGAGGACGGTTACCACGGTGTGATT  
CATGACTGGGGTGAAG

>*Pseudomonas cremoricolorata* NBRC 16634 (NR113855)

ATTGAACGCTGGCGGCAGGCCTAACACATGCAAGTCGAGCGGATGACAGGAGCTT  
GCTCCTGGATTCAGCGGCGGACGGGTGAGTAATGCCTAGGAATCTGCCTGGTAGTG  
GGGGACAACGTTTCGAAAGGAACGCTAATACCGCATAACGTCCTACGGGAGAAAGC  
AGGGGACCTTCGGGCCTTGCCTATCAGATGAGCCTAGGTCGGATTAGCTTGTTGG  
TGAGGTAATGGCTCACCAAGGCGACGATCCGTAACCTGGTCTGAGAGGATGATCAG  
TCACACTGGAACCTGAGACACGGTCCAGACTCCTACGGGAGGCAGCAGTGGGGAAT  
ATTGGACAATGGGCGAAAGCCTGATCCAGCCATGCCGCGTGTGTGAAGAAGGTCTT  
CGGATTGTAAAGCACTTTAAGTTGGGAGGAAGGGTTGTAGATTAATACTCTGCAAT  
TTTGACGTTACCGACAGAATAAGCACCGGCTAACTCTGTGCCAGCAGCCGCGGTAA  
TACAGAGGGTGCAAGCGTTAATCGGAATTACTGGGCGTAAAGCGCGCGTAGGTGG  
TTTGTAAAGTTGGATGTGAAAGCCCCGGGCTAACCTGGGAACTGCATCCAAAACCT  
GGCAAGCTAGAGTACGGTAGAGGGTGGTGGAAATTCCTGTGTAGCGGTGAAATGC

GTAGATATAGGAAGGAACACCAGTGGCGAAGGCGACCACCTGGACTGATACTGAC  
ACTGAGGTGCGAAAGCGTGGGGAGCAAACAGGATTAGATACCCTGGTAGTCCACG  
CCGTAAACGATGTCAACTAGCCGTTGGAATCCTTGAGATTTTAGTGGCGCAGCTAA  
CGCATTAAAGTTGACCGCCTGGGGAGTACGGCCGCAAGGTTAAAACCTCAAATGAATT  
GACGGGGGCCCCGCACAAGCGGTGGAGCATGTGGTTTAAATTCGAAGCAACGCGAAG  
AACCTTACCAGGCCTTGACATGCAGAGAACTTCCAGAGATGGATTGGTGCCTTCG  
GGAACCTCTGACACAGGTGCTGCATGGCTGTCGTCAGCTCGTGTGAGATGTTGG  
GTTAAGTCCCGTAACGAGCGCAACCCTTGTCTTAGTTACCAGCACGTTATGGTGG  
GCACTCTAAGGAGACTGCCGGTGACAAACCGGAGGAAGGTGGGGATGACGTCAAG  
TCATCATGGCCCTTACGGCCTGGGCTACACACGTGCTACAATGGTCCGGTACAGAGG  
GTTGCCAAGCCGCGAGGTGGAGCTAATCTCACAAAACCGATCGTAGTCCGGATCGC  
AGTCTGCAACTCGACTGCGTGAAGTCGGAATCGCTAGTAATCGCGAATCAGAATGT  
CGCGGTGAATACGTTCCCGGGCCTTGTACACACCGCCCGTCACACCATGGGAGTGG  
GTTGCACCAGAAGTAGCTAGTCTAACCTTCGGGNGGACGGTTACCACGGTGTGATT  
CATGACTGGGGTGAAG

>*Pseudomonas parafulva* AJ 2129 (NR040859)

ATCCTGGCTCAGATTGAACGCTGGCGGCAGGCCTAACACATGCAAGTCGAGCGGA  
TGACGGGAGCTTGCTCCTTGATTACGCGGCGGACGGGTGAGTAATGCCTAGGAATC  
TGCTGGTAGTGGGGGACAACGTTTCGAAAGGAACGCTAATACCGCATAACGTCCTA  
CGGGAGAAAGCAGGGGACCTTCGGGCCTTGCCTATCAGATGAGCCTAGGTCGGA  
TTAGCTTGTGGTGGTGAAGTAAAGCACTTTAAGTTGGGAGGAAGGGTTGTAGATTA  
ATACTCTGCAATTTTGACGTTACCGACAGAATAAGCACCGGCTAACTCTGTGCCAG  
CAGCCGCGGTAATACAGAGGGTGAAGCGTTAATCGGAATTACTGGGCGTAAAGC  
GCGCGTAGGTGGTTTGTAAAGTTGGATGTGAAAGCCCCGGGCTCAACCTGGGAACT  
GCATCCAAAACCTGGCAAGCTAGAGTACGGTAGAGGGTGGTGGAAATTCCTGTGTA  
GCGGTGAAATGCGTAGATATAGGAAGGAACACCAGTGGCGAAGGCGACCACCTGG  
ACTGATACTGACACTGAGGTGCGAAAGCGTGGGGAGCAAACAGGATTAGATACC  
TGGTAGTCCACGCCGTAACGATGTCAACTAGCCGTTGGAATCCTTGAGATTTTAG  
TGCGCAGCTAACGCATTAAGTTGACCGCCTGGGGAGTACGGCCGCAAGGTTAAA  
ACTCAAATGAATTGACGGGGGCCCCGCACAAGCGGTGGAGCATGTGGTTTAAATTCG  
AAGCAACGCGAAGAACCTTACCAGGCCTTGACATGCAGAGAACTTCCAGAGATG  
GATTGGTGCCTTCGGGAACTCTGACACAGGTGCTGCATGGCTGTCGTCAGCTCGTG  
TCGTGAGATGTTGGGTTAAGTCCCGTAACGAGCGCAACCCTTGTCTTAGTTACCA  
GCACGTTATGGTGGGCACTCTAAGGAGACTGCCGGTGACAAACCGGAGGAAGGTG  
GGGATGACGTCAAGTCATCATGGCCCTTACGGCCTGGGCTACACACGTGCTACAAT  
GGTCGGTACAGAGGGTTGCCAAGCCGCGAGGTGGAGCTAATCTCACAAAACCGAT  
CGTAGTCCGGATCGCAGTCTGCAACTCGACTGCGTGAAGTCGGAATCGCTAGTAAT  
CGCGAATCAGAATGTCGCGGTGAATACGTTCCCGGGCCTTGTACACACCGCCCGTC  
ACACCATGGGAGTGGGTTGCACCAGAAGTAGCTAGTCTAACCTTCGGGAGGACGG  
TTACCACGGTGTGATTGACTGGGGTGAAGTCGTAACAAG

>*Pseudomonas fulva* IAM1529 (NR115610)

AGTTTGATCCTGGCTCAGATTGAACGCTGGCGGCAGGCCTAACACATGCAAGTCGA  
GCGGATGACAGGAGCTTGCTCCTGGATTACGCGGCGGACGGGTGAGTAATGCCTA  
GGAATCTGCCTGGTAGTGGGGGACAACGTTTCGAAAGGAACGCTAATACCGCATA  
CGTCCTACGGGAGAAAGCAGGGGACCTTCGGGCCTTGCCTATCAGATGAGCCTA  
GGTCGGATTAGCTTGTGGTGGTGAAGTAAAGCACTTTAAGTTGGGAGGAAGGGTTGTAGATTA  
GTCTGAGAGGATGATCAGTCACACTGGAACCTGAGACACGGTCCAGACTCCTACGG  
GAGGCAGCAGTGGGGAATATTGGACAATGGGCGAAAGCCTGATCCAGCCATGCCG



CGTGTGTGAAGAAGGTCTTCGGATTGTAAGCACTTTAAGTTGGGAGGAAGGGTTG  
TAGATTAATACTCTGCAATTTTGACGTTACCGACAGAATAAGCACCGGCTAACTCT  
GTGCCAGCAGCCGCGGTAATACAGAGGGTGAAGCGTTAATCGGAATTACTGGGC  
GTAAAGCGCGCGTAGGTGGTTTGTAAAGTTGGATGTGAAAGCCCCGGGCTCAACCT  
GGGAACTGCATCCAAAAGTGGCAAGCTAGAGTACGGTAGAGGGTGGTGGAAATTC  
CTGTGTAGCGGTGAAATGCGTAGATATAGGAAGGAACACCAGTGGCGAAGGCGAC  
CACCTGGACTGATACTGACACTGAGGTGCGAAAGCGTGGGGAGCAAACAGGATTA  
GATACCCTGGTAGTCCACGCCGTAAACGATGTCAACTAGCCGTTGGAATCCTTGAG  
ATTTAGTGGCGCAGCTAACGCATTAAGTTGACCGCCTGGGGAGTACGGCCGCAAG  
GTTAAAAGTCAAATGAATTGACGGGGGCCCGCACAAAGCGGTGGAGCATGTGGTTT  
AATTCGAAGCAACGNGAAGAACCTTACCAGGCCTTNACATGCAGAGAACTTTTCA  
NGATGGTATTGTGCCTTCGGGAACTCTACACAGGTGCTGCATGNCTGTCGTCAGC  
TCGTGTCGTGAGATGTTGGGTTAAGTCCCGTAACGAGCGCAACCCTTGTCCTTAGTT  
ACCAGCACATTATGGTGGGCACTCTAAGGAGACTGCCGGTGACAAACCGGAGGAA  
GGTGGGGATGACGTCAAGTCATCATGGCCCTTACGGCCTGGGCTACACACGTGCTA  
CAATGGTTCGGTACAGAGGGTTGCCAAGCCGCGAGGTGGAGCTAATCTCACAAAAC  
CGATCGTAGTCCGGATCGCAGTCTGCAACTCGACTGCGTGAAGTCGGAATCGCTAG  
TAATCGCGAATCAGAAATGTCGCGGTGAATACGTTCCCGGGCCTTGACACACCGCC  
CGTCACACCATGGGAGTGGGTTGCACCAGAAGTAGCTAGTCTAACCTTCGGGGGG  
ACGGTTACCACGGTGTGATTCATGACTGGGGTGAAGTCGTAACAAGGTAGCCGTAG  
GGGAACTGCGGCTGGATCACCTCCTT

>*Pseudomonas reinekei* MT1 (NR042541)

ATTGAACGCTGGCGGCAGGCCTAACACATGCAAGTCGAGCGGATGACAGGAGCTT  
GCTCCTGAATTCAGCGGCGGACGGGTGAGTAATGCCTAGGAATCTGCCTGRTAGTG  
GGGGACAACGTTTCGAAAGGAACGCTAATACCGCATACTCCTACGGGAGAAAGC  
AGGGGACCTTCGGGCCTTGCGCTATCAGATGAGCCTAGGTCGGATTAGCTAGTTGG  
TGAGGTAATGGCTCACCAAGGCGACGATCCGTAAGTGGTCTGAGAGGATGATCAG  
TCACACTGGAAGTGGAGACACGGTCCAGACTCCTACGGGAGGCAGCAGTGGGGAAAT  
ATTGGACAATGGGCGAAAGCCTGATCCAGCCATGCCGCGTGTGTGAAGAAGGTCTT  
CGGATTGTAAGCACTTTAAGTTGGGAGGAAGGGTTGTAGATTAATACTCTGCAAT  
TTTGACGTTACCGACAGAATAAGCACCGGCTAACTCTGTGCCAGCAGCCGCGGTAA  
TACAGAGGGTGAAGCGTTAATCGGAATTACTGGGCGTAAAGCGCGCGTAGGTGG  
TTTGTAAAGTTGGATGTGAAATCCCCGGGCTCAACCTGGGAACTGCATTCAAAAGT  
GACAAGCTAGAGTATGGTAGAGGGTGGTGGAAATTCCTGTGTAGCGGTGAAATGC  
GTAGATATAGGAAGGAACACCAGTGGCGAAGGCGACCACCTGGACTGATACTGAC  
ACTGAGGTGCGAAAGCGTGGGGAGCAAACAGGATTAGATACCCTGGTAGTCCACG  
CCGTAAACGATGTCAACTAGCCGTTGGGAGCCTTGAGCTCTTAGTGGCGCAGCTAA  
CGCATTAAAGTTGACCGCCTGGGGAGTACGGCCGCAAGGTTAAAAGTCAAATGAATT  
GACGGGGGCCCCGCACAAGCGGTGGAGCATGTGGTTTAAATTCGAAGCAACGCGAAG  
AACCTTACCAGGCCTTGACATCCAATGAACTTCCAGAGATGGATTGGTGCCTTCG  
GGAACATTGAGACAGGTGCTGCATGGCTGTCGTCAGCTCGTGTGTCGTGAGATGTTGG  
GTTAAGTCCCGTAACGAGCGCAACCCTTGTCCTTAGTTACCAGCACGTTATGGTGG  
GCACTCTAAGGAGACTGCCGGTGACAAACCGGAGGAAGGTGGGGATGACGTCAAG  
TCATCATGGCCCTTACGGCCTGGGCTACACACGTGCTACAATGGTTCGGTACAGAGG  
GTTGCCAAGCCGCGAGGTGGAGCTAATCCATAAAACCGATCGTAGTCCGGATCGC  
AGTCTGCAACTCGACTGCGTGAAGTCGGAATCGCTAGTAATCGCGAATCAGAATGT  
CGCGGTGAATACGTTCCCGGGCCTTGACACACCGCCCGTCACACCATGGGAGTGG  
GTTGCACCAGAAGTAGCTAGTCTAACCTTCGGGAGGACGGTTACCACGGTGTGATT  
CATGACTGGGGTGAAGTCGTAACAAGGTAGCCGTAGGGGAACTGC

>*Pseudomonas alcaligenes* ATCC 14909 (NR114472)

TGGCCTCAGATTGAACGCTGGCGGCAGGCCTAACACATGCAAGTCGAGCGGATGA  
GTGGAGCTTGCTCCATGATTCAGCGGGACGGGTGAGTAATGCCTAGGAATCTGC  
CTGGTAGTGGGGGACAACGTTTCGAAAGGAACGCTAATACCGCATAACGTCCTACG  
GGAGAAAGCAGGGGACCTTCGGGCCTTGCCTATCAGATGAGCCTAGGTCGGATT  
AGCTAGTAGGTGAGGTAATGGCTCACCTAGGCGACGATCCGTAACCTGGTCTGAGA  
GGATGATCAGTCACACTGGAAGTGGAGACACGGTCCAGACTCCTACGGGAGGCAGC  
AGTGGGGAATATTGGACAATGGGCGAAAGCCTGATCCAGCCATGCCGCGTGTGTG  
AAGAAGGTCTTCGGATTGTAAAGCACTTTAAGTTGGGAGGAAGGGCAGTAAGTTA  
ATACCTTGCTGTTTTGACGTTACCAACAGAATAAGCACCGGCTAACTTCGTGCCAG  
CAGCCGCGGTAATACGAAGGGTGAAGCGTTAATCGGAATTACTGGGCGTAAAGC  
GCGCGTAGGTGGTTCAGCAAGTTGGAGGTGAAATCCCCGGGCTCAACCTGGGAAC  
TGCTCCAAAACACTACTGAGCTAGAGTACGGTAGAGGGTAGTGGAATTTCTGTGTA  
GCGGTGAAATGCGTAGATATAGGAAGGAACACCAGTGGCGAAGGGCGACTACCTGG  
ACTGATACTGACACTGAGGTGCGAAAGCGTGGGGASCAAACAGGATTAGATACCC  
TGGTAGTCCACGCCGTAAACGATGTCGACTAGCCGTTGGGATCCTTGAGATCTTAG  
TGGCGCAGCTAACGCATTAAGTCGACCGCCTGGGGAGTACGGCCGCAAGGTTAAA  
ACTCAAATGAATTGACGGGGGCCCGCACAAGCGGTGGAGCATGTGGTTTTAATTCG  
AAGCAACGCGAAGAACCTTACCTGGCCTTGACATGCTGAGAACTTTCCAGAGATGG  
ATTGGTGCCTTCGGGAACCTCAGACACAGGTGCTGCATGGCTGTCGTCAGCTCGTGT  
CGTGAGATGTTGGGTTAAGTCCCGTAACGAGCGCAACCCTTGTCCTTAGTTACCAG  
CACGTTATGGTGGGCACTCTAAGGAGACTGCCGGTGACAAACCGGAGGAAGGTGG  
GGATGACGTCAAGTCATCATGGCCCTTACGGCCAGGGCTACACACGTGCTACAATG  
GTCGGTACAAAGGGTTGCCAAGCCGCGAGGTGGAGCTAATCCCATAAAACCGATC  
GTAGTCCGGATCGCAGTCTGCAACTCGACTGCGTGAAGTCGGAATCGCTAGTAATC  
GTGAATCAGAATGTCACGGTGAATACGTTCCCGGGCCTTGACACACCGCCCGTCA  
CACCATGGGAGTGGGTTGCTCCAGAAGTAGCTAGTCTAACCAGCAAGGGGGACGGT  
TACCACGGAGTGATTCATG

>Chryseobacterium haifense H38 (NR044167)

ATGGCTCAGGATGAACGCTAGCGGGAGGCCTAACACATGCAAGCCGAGCGGTAGA  
GTTNCTTCGGNAACTTGAGAGCGGGCGCACGGGTGCGTAACACGTGTGCAACCTACC  
TTTATCTGGGGGATAGCCTTTCGAAAGGAAGATTAATACCCATAATATAATGATT  
GGCATCAATTATTGAAAACCTCCGGTGGATAGAGATGGGCACGCGCAAGATTA  
GATAGTTGGTGAGGTAACGGCTCACCAAGTCAATGATCTTTAGGGGTCTTGAGAGG  
GAGATCCCCCACACTGGTACTGAGACACGGACCAGACTCCTACGGGAGGCAGCAG  
TGAGGAATATTGGACAATGGGTGAGAGCCTGATCCAGCCATCCCGCGTGAAGGAT  
GACGGTCTTATGGATTGTAAACTTCTTTTGTACAGGGATAAACCTACTCTCGTGAG  
GGTAGCTGAAGGTAAGTGTACGAATAAGCACCGGCTAACTCCGTGCCAGCAGCCGC  
GGTAATACGGAGGGTGAAGCGTTATCCGGATTTATTGGGTTTAAAGGGTCCGTAG  
GCGGACTTGTAAGTCAGTGGTGAATCTCATAGCTTAACTATGAACTGCCATTGA  
TACTGCAGGTCTTGAGTAAATTTGAAGTGGCTGGAATAAGTAGTGTAGCGGTGAAA  
TGCATAGATATTACTTAGAACACCAATTGCGAAGGCAGGTCCTAAGATTTAACTG  
ACGCTGATGGACGAAAGCGTGGGGAGCGAACAGGATTAGATACCCTGGTAGTCCA  
CGCCGTAAACGATGCTAACTCGTTTTTTGGATTTTCGGATTCAGAGACCAAGCGAAA  
GTGATAAGTTAGCCACCTGGGGAGTACGTCCGCAAGGATGAACTCAAAGGAATT  
GACGGGGGCCCGCACAAGCGGTGGATTATGTGGTTTTAATTCGATGATACGCGAGG  
AACCTTACCAAGACTTAAATGGGAATTGACAGGTCTAGAAAATAGACCCTCCTTCGG  
GCAATTTCCAAGGTGCTGCATGGTTGTCGTCAGCTCGTGCCGTGAGGTGTTAGGTT  
AAGTCCTGCAACGAGCGCAACCCTGTCACTAGTTGCTAACATTTAGTTGAGGACT  
CTAGTGAGACTGCCTACGCAAGTAGAGAGGAAGGTGGGGATGACGTCAAATCATC  
ACGGCCCTTACGTCTTGGGCCACACACGTAATAACAATGGCCGGTACAGAGGGCAG  
CTACACAGCGATGTGATGCAAATCTCGAAAGCCGGTCTCAGTTCGGATTGGAGTCT

GCAACTCGACTCTATGAAGCTGGAATCGCTAGTAATCGCGCATCAGCCATGGCGCG  
GTGAATACGTTCCCGGGCCTTGTACACACCGCCCGTCAAGCCATGGAAGTCTGGGG  
TACCTGAAGTCGGTGACCGTAAAAGGAGCTGCCTAGGGTAAAACAGGTAAGTACTAGG  
GCTAAGTCGTAACAAGCTAACCGTAAGCTTTCACA

>*Chryseobacterium lactis* KC1864 (NR126256)

GATGAACGCTAGCGGGAGGCCTAACACATGCAAGCCGAGCGGTAGAGATTCTTCG  
GAATCTTGAGAGCGGGCTACGGGTGCGGAACACGTGTGCAACCTGCCTTTATCTGG  
GGGATAGCCTTTCGAAAGGAAGATTAATACCCATAATATATTGAATGGCATCATT  
TGATATTGAAAACCTCCGGTGGATAGAGATGGGCACGCGCAAGATTAGATAGTTGG  
TGAGGTAACGGCTCACCAAGTCTACGATCTTTAGGGGGCCTGAGAGGGTGTATCCCC  
CACACTGGTACTGAGACACGGACCAGACTCCTACGGGAGGCAGCAGTGAGGAATA  
TTGGACAATGGGTGAGAGCCTGATCCAGCCATCCCGCGTGAAGGACGACGGCCCT  
ATGGGTGTAAACTTCTTTTGTATAGGGATAAACCTACTCTCGTGAGAGTAGCTGA  
AGGTACTATACGAATAAGCACCGGCTAACTCCGTGCCAGCAGCCGCGGTAATACG  
GAGGGTGCAAGCGTTATCCGGATTTATTGGGTTTAAAGGGTCCGTAGGCGGATCTG  
TAAGTCAGTGGTGAAATCTCACAGCTTAACTGTGAAACTGCCATTGATACTGCAGG  
TCTTGAGTGTGTTGAAGTAGCTGGAATAAGTAGTGTAGCGGTGAAATGCATAGAT  
ATTACTTAGAACACCAATTGCGAAGGCAGGTTACTAAGCAACAAGTACGCTGATG  
GACGAAAGCGTGGGGAGCGAACAGGATTAGATACCCTGGTAGTCCACGCCGTAAA  
CGATGCTAACTCGTTTTTTGGGCTTTCGGGTTTCAGAGACTAAGCGAAAGTGATAAGT  
TAGCCACCTGGGGAGTACGTTTCGCAAGAATGAAACTCAAAGGAATTGACGGGGGC  
CCGCACAAGCGGTGGATTATGTGGTTTAATTCGATGATACGCGAGGAACCTTACCA  
AGGCTTAAATGGGAAATGACAGGTTTAGAAATAGACTTTTCTTCGGACATTTTTCA  
AGGTGCTGCATGGTTGTCGTCAGCTCGTGCCGTGAGGTGTTAGGTTAAGTCCTGCA  
ACGAGCGCAACCCCTGTCACTAGTTGCCATCATTAAAGTTGGGGACTCTAGTGAGAC  
TGCTACGCAAGTAGAGAGGAAGGTGGGGATGACGTCAAATCATCACGGCCCTTA  
CGCCTTGGGCCACACACGTAATACAATGGCCAGTACAGAGGGCAGCTACACAGCG  
ATGTGATGCAAATCTCGAAAGCTGGTCTCAGTTCGGATTGGAGTCTGCAACTCGAC  
TCTATGAAGCTGGAATCGCTAGTAATCGCGCATCAGCCATGGCGCGGTGAATACGT  
TCCCGGGCCTTGTACACACCGCCCGTCAAGCCATGGAAGTCTGGGGTACCTGAAGT  
CGGTGACCGTAATAGGAGCTGCCTAGGGTAAAACAGGTAAGTACTAGGGCT

>*Acinetobacter pittii* CIP 70.29 (NR116774)

TAGAGTTTGATCCTGGCTCAGATTGAACGCTGGCGGCAGGCTTAACACATGCAAGT  
CGAGCGGAGAGAGGTAGCTTGCTACTGATCTTAGCGGCGGACGGGTGAGTAATGC  
TTAGGAATCTGCCTATTAGTGGGGGACAACATTTTCGAAAGGAATGCTAATACCGCA  
TACGTCCTACGGGAGAAAGCAGGGGATCTTCGGACCTTGCCTAATAGATGAGCCT  
AAGTCGGATTAGCTAGTTGGTGGGGTAAAGGCCTACCAAGGCGACGATCTGTAGC  
GGGTCTGAGAGGATGATCCGCCACACTGGGACTGAGACACGGCCAGACTCCTAC  
GGGAGGCAGCAGTGGGGAATATTGGACAATGGGCGCAAGCCTGATCCAGCCATGC  
CGCGTGTGTGAAGAAGGCCTTATGGTTGTAAAGCACTTTAAGCGAGGAGGAGGCT  
ACTTTAGTTAATACCTAGAGATAGTGGACGTTACTCGCAGAATAAGCACCGGCTAA  
CTCTGTGCCAGCAGCCGCGGTAATACAGAGGGTGAAGCGTTAATCGGATTTACTG  
GGCGTAAAGCGCGCGTAGGCGGCTAATTAAGTCAAATGTGAAATCCCCGAGCTTA  
ACTTGGGAATTGCATTCGATACTGGTTAGCTAGAGTGTGGGAGAGGATGGTAGAAT  
TCCAGGTGTAGCGGTGAAATGCGTAGAGATCTGGAGGAATACCGATGGCGAAGGC  
AGCCATCTGGCCTAACACTGACGCTGAGGTGCGAAAGCATGGGGAGCAAACAGGA  
TTAGATACCCTGGTAGTCCATGCCGTAACGATGTCTACTAGCCGTTGGGGCCTTT  
GAGGCTTTAGTGGCGCAGCTAACGCGATAAGTAGACCGCCTGGGGAGTACGGTTCG  
CAAGACTAAAACCTCAAATGAATTGACGGGGGGCCCGCACAAAGCGGTGGAACCATGT  
GGTTTAATTCGATGCAACGCGAAGAACCTTACCTGGCCTTGACATAGTAAGAAGT  
TCCAGAGATGGATTGGTGCCTTCGGGAACCTTACATACAGGTGCTGCATGGCTGTGC

TCAGCTCGTGTCTGAGATGTTGGGTAAAGTCCCGCAACGAGCGCAACCCTTTTCC  
TTATTTGCCAGCGAGTAATGTCGGGAACCTTTAAGGATACTGCCAGTGACAACTGG  
AGGAAGGCGGGGACGACGTCAAGTCATCATGGCCCTTACGGCCAGGGCTACACAC  
GTGCTACAATGGTTCGGTACAAAGGGTTGCTACCTAGCGATAGGATGCTAATCTCAA  
AAAGCCGATCGTAGTCCGGATTGGAGTCTGCAACTCGACTCCATGAAGTCGGAATC  
GCTAGTAATCGCGGATCAGAATGCCGCGGTGAATACGTTCCCGGGCCTTGTACACA  
CCGCCCCGTCACACCATGGGAGTTTGTGTCACCAGAAGTAGCTAGCCTAACTGCAAA  
GAGGGCGGTTACCACGGTGTGGCCGATGACTGGGGTGAAGTCGTAACAAGGTAGC  
CGTAGGGGAACCTGNGGATGGATCACCTCCTTA

>Beijerinckia fluminensis UQM 1685 (Agrobacterium radiobacter) (NR116306)

AGTTTGATCCTGGCTCAGAACGAACGCTGGCGGCAGGCTTAACACATGCAAGTCGA  
ACGCCCCGCAAGGGGAGTGGCAGACGGGTGAGTAACGCGTGGGAACATAACCCTTT  
CCTGCGGAATAGCTCCGGGAAACTGGAATTAATACCGCATAACGCCCTACGGGGGA  
AAGATTTATCGGGGAAGGATTGGCCCGCGTTGGATTAGCTAGTTGGTGGGGTAAAG  
GCCTACCAAGGCGACGATCCATAGCTGGTCTGAGAGGATGATCAGCCACATTGGG  
ACTGAGACACGGCCCAAACCTCCTACGGGAGGCAGCAGTGGGGAATATTGGACAAT  
GGGCGCAAGCCTGATCCAGCCATGCCGCGTGAGTGATGAAGGCCTTAGGGTTGTA  
AAGCTCTTTCACCGGAGAAGATAATGACGGTATCCGGAGAAGAAGCCCCGGCTAA  
CTTCGTGCCAGCAGCCGCGGTAATACGAAGGGGGCTAGCGTTGTTTCGGAATTACTG  
GGCGTAAAGCGCACGTAGGCGGATATTTAAGTCAGGGGTGAAATCCCAGAGCTCA  
ACTCTGGAAGTGCCTTTGATACTGGGTATCTTGAGTATGGAAGAGGTAAGTGGAA  
TCCGAGTGTAGAGGTGAAATTCGTAGATATTCGGAGGAACACCAGTGGCGAAGGC  
GGCTTACTGGTCCATTACTGACGCTGAGGTGCGAAAGCGTGGGGAGCAAACAGGA  
TTAGATAACCCTGGTAGTCCACGCCGTAAACGATGAATGTTAGCCGTCGGGCAGTAT  
ACTGTTTCGGTGGCGCAGCTAACGCATTAACATTCCGCCTGGGGAGTACGGTTCGA  
AGATTA AAACTCAAAGGAATTGACGGGGGCCCGCACAAAGCGGTGGAGCATGTGGT  
TTAATTCGAAGCAACGCGCAGAACCTTACCAGCTCTTGACATTCGGGGTATGGGCA  
TTGGAGACGATGTCCTTCAGTTAGGCTGGCCCCAGAACAGGTGCTGCATGGCTGTC  
GTCAGCTCGTGTCTGAGATGTTGGGTAAAGTCCCGCAACGAGCGCAACCCTCGCC  
CTTAGTTGCCAGCATTAGTTGGGCACTCTAAGGGGACTGCCGGTGATAAGCCGAG  
AGGAAGGTGGGGATGACGTCAAGTCCTCATGGCCCTTACGGGCTGGGCTACACAC  
GTGCTACAATGGTGGTGACAGTGGGCAGCGAGACAGCGATGTCGAGCTAATCTCC  
AAAAGCCATCTCAGTTCGGATTGCACTCTGCAACTCGAGTGCATGAAGTTGGAATC  
GCTAGTAATCGCAGATCAGCATGCTGCGGTGAATACGTTCCCGGGCCTTGTACACA  
CCGCCCCGTCACACCATGGGAGTTGGTTTTACCCGAAGGTAGTGCCTAACCGCAAG  
GAGGCAGCTAACCACGGTAGGGTCAGCGACTGGGGTGAAGTCGTAACAAGGTAGC  
CGTAA

>Agrobacterium tumefaciens NCPPB2437 (NR115516)

GTTTGATCCTGGCTCAGAACGAACGCTGGCGGCAGGCTTAACACATGCAAGTCGAA  
CGCCCCGCAAGGGGAGTGGCAGACGGGTGAGTAACGCGTGGGAACATAACCCTTTC  
CTGCGGAATAGCTCCGGGAAACTGGAATTAATACCGCATAACGCCCTACGGGGGAA  
AGATTTATCGGGGAAGGATTGGCCCGCGTTGGATTAGCTAGTTGGTGGGGTAAAGG  
CCTACCAAGGCGACGATCCATAGCTGGTCTGAGAGGATGATCAGCCACATTGGGA  
CTGAGACACGGCCCAAACCTCCTACGGGAGGCAGCAGTGGGGAATATTGGACAATG  
GGCGCAAGCCTGATCCAGCCATGCCGCGTGAGTGATGAAGGCCTTAGGGTTGTAA  
AGCTCTTTCACCGGAGAAGATAATGACGGTATCCGGAGAAGAAGCCCCGGCTAAC  
TTCGTGCCAGCAGCCGCGGTAATACGAAGGGGGCTAGCGTTGTTTCGGAATTACTGG  
GCGTAAAGCGCACGTAGGCGGATATTTAAGTCAGGGGTGAAATCCCAGAGCTCAA  
CTCTGGAAGTGCCTTTGATACTGGGTATCTTGAGTATGGAAGAGGTAAGTGGAA  
CCGAGTGTAGAGGTGAAATTCGTAGATATTCGGAGGAACACCAGTGGCGAAGGCG  
GCTTACTGGTCCATTACTGACGCTGAGGTGCGAAAGCGTGGGGAGCAAACAGGAT

TAGATACCCTGGTAGTCCACGCCGTA AACGATGAATGTTAGCCGTCGGGCAGTATA  
CTGTTCCGGTGGCGCACGTAACGCATTA AACATTCCGCCTGGGGAGTACGGTTCGCAA  
GATTA AAACTCAAAGGAATTGACGGGGGCCCCGCACAAGCGGTGGAGCATGTGGTT  
TAATTCGAAGCAACGCGCAGAACCTTACCAGCTCTTGACATTCCGGGGTTTGGGCAG  
TGGAGACATTGTCCTTCAGTTAGGCTGGCCCCAGAACAGGTGCTGCATGGCTGTCCG  
TCAGCTCGTGTGTCGAGATGTTGGGTAAAGTCCCGCAACGAGCGCAACCCTCGCCC  
TTAGTTGCCAGCATTTAGTTGGGCACTCTAAGGGGACTGCCGGTGATAAGCCGAGA  
GGAAGGTGGGGATGACGTCAAGTCCTCATGGCCCTTACGGGCTGGGCTACACACGT  
GCTACAATGGTGGTGACAGTGGGCAGCGAGACAGCGATGTTCGAGCTAATCTCCAA  
AAGCCATCTCAGTTCGGATTGCACTCTGCAACTCGAGTGCATGAAGTTGGAATCGC  
TAGTAATCGCAGATCAGCATGCTGCGGTGAATACGTTCCCGGGCCTTGTACACACC  
GCCCCGTCACACCATGGGAGTTGGTTTTACCCGAAGGTAGTGCCTAACC GCAAGGA  
GGCAGCTAACCACGGTAGGGTCAGCGACTGGGGTGAAGTCGTAACAAGGTAGCCG  
TAGGGGAACCTGCGGCTGGATCACCTCC

>Agrobacterium larrymoorei AF3.10 (NR026519)

AACGAACGCTGGCGGCAGGCTTAACACATGCAAGTCGAACGCATCGCAAGATGAG  
TGGCAGACGGGTGAGTAACGCGTGGGAACATAACCCTTTTCTACGGAATAGCTCTGG  
GAAACTGGAATTAATACCGTATACGCCCTACGGGGGAAAGATTTATCGGGGAAGG  
ATTGGCCCGCGTTGGATTAGCTAGTTGGTGGGGTAAAGGCCTACCAAGGCGACGAT  
CCATAGCTGGTCTGAGAGGATGATCAGCCACATTGGGACTGAGACACGGCCCAA  
CTCCTACGGGAGGCAGCAGTGGGGAATATTGGACAATGGGCGCAAGCCTGATCCA  
GCCATGCCGCGTGAGTGATGAAGGCCTTAGGGTTGTAAAGCTCTTTCACCGATGAA  
GATAATGACGGTAGTCGGAGAAGAAGCCCCGGCTAACTTCGTGCCAGCAGCCGCG  
GTAATACGAAGGGGGCTAGCGTTGTTTCGGAATTACTGGGCGTAAAGCGCACGTAG  
GCGGATATTTAAGTCAGGGGTGAAATCCCAGAGCTCAACTCTGGAACTGCCTTTGA  
TACTGGGTATCTTGAGTATGGAAGAGGTAAGTGGAAATTGCGAGTGTAGAGGTGAA  
ATTCGTAGATATTCGCAGGAACACCAGTGGCGAAGGCGGCTTACTGGTCCATTACT  
GACGCTGAGGTGCGAAAGCGTGGGGAGCAAACAGGATTAGATAACCCTGGTAGTCC  
ACGCCGTAAACGATGAATGTTAGCCGTCGGGCAGTATACTGTTCCGGTGGCGCAGNT  
AACGCATTA AACATTCCGCCTGGGGAGTACGGTTCGCAAGATTA AAACTCAAAGGA  
ATTGACGGGGGCCCCGCACAAGCGGTGGAGCATGTGGTTTAATTCGAAGCAACGCG  
CAGAACCTTACCAGCTCTTGACATTCCGGGTATGGTCATTGGAGACGATGACCTTC  
AGTTCGGCTGGCCCTAGAACAGGTGCTGCATGGCTGTCGTCAGCTCGTGTGTCGAG  
ATGTTGGGTAAAGTCCCGCAACGAGCGCAACCCTCGCCCTTAGTTGCCAGCATTG  
GTTGGGCACTCTAAGGGGACTGCCGGTGATAAGCCGAGAGGAAGGTGGGGATGAC  
GTCAAGTCCTCATGGCCCTTACGGGCTGGGCTACACACGTGCTACAATGGTGGTGA  
CAGTGGGCAGCGAGACAGCGATGTTCGAGCTAATCTCCAAAAGCCATCTCAGTTCG  
GATTGCACTCTGCAACTCGAGTGCATGAAGTTGGAATCGCTAGTAATCGCAGATCA  
GCATGCTGCGGTGAATACGTTCCCGGGCCTTGTACACACC GCCC GTCACACCATGG  
GAGTTGGTTTTACCCGAAGGCGCTGCGCTAACC GCAAGGGGGCAGGCGACCACGG  
TAGGGTCAGCGACTGGGGTGAAGTCGTAACAAGGTAGCCGTAGGGGAACC

>Agrobacterium fabrum C58 (NR074266)

TTGAGAGTTTGATCCTGGCTCAGAACGAACGCTGGCGGCAGGCTTAACACATGCAA  
GTCGAACGCCCCCGCAAGGGGAGTGGCAGACGGGTGAGTAACGCGTGGGAATCTAC  
CCATCTCTGCGGAATAGCTCTGGGAAACTGGAATTAATACCGCATAACGCCCTACGG  
GGGAAAGATTTATCGGGGATGGATGAGCCCGCGTTGGATTAGCTAGTTGGTGGGGT  
AAAGGCCTACCAAGGCGACGATCCATAGCTGGTCTGAGAGGATGATCAGCCACAT  
TGGGACTGAGACACGGCCAAACTCCTACGGGAGGCAGCAGTGGGGAATATTGGA  
CAATGGGCGCAAGCCTGATCCAGCCATGCCGCGTGAGTGATGAAGGCCTTAGGGTT  
GTAAAGCTCTTTCACCGATGAAGATAATGACGGTAGTCGGAGAAGAAGCCCCGGC  
TAACTTCGTGCCAGCAGCCGCGGTAATACGAAGGGGGCTAGCGTTGTTTCGGAATTA

CTGGGCGTAAAGCGCACGTAGGCGGATATTTAAGTCAGGGGTGAAATCCCGCAGC  
TCAACTGCGGAAGTGCCTTTGATACTGGGTATCTTGAGTATGGAAGAGGTAAGTGG  
AATTCCGAGTGTAGAGGTGAAATTCGTAGATATTCGGAGGAACACCAGTGGCGAA  
GGCGGCTTACTGGTCCATTACTGACGCTGAGGTGCGAAAGCGTGGGGAGCAAACA  
GGATTAGATACCCTGGTAGTCCACGCCGTAAACGATGAATGTTAGCCGTGCGGCAG  
TATACTGTTCCGGTGGCGCAGCTAACGCATTAACATTCCGCCTGGGGAGTACGGTC  
GCAAGATTA AAACTCAAAGGAATTGACGGGGGCCCGCACAAAGCGGTGGAGCATGT  
GGTTTAATTTCGAAGCAACGCGCAGAACCTTACCAGCTCTTGACATTCGGGGTATGG  
GCATTGGAGACGATGTCCTTCAGTTAGGCTGGCCCCAGAACAGGTGCTGCATGGCT  
GTCGTCAGCTCGTGTCTGAGATGTTGGGTTAAGTCCCGCAACGAGCGCAACCCTC  
GCCCTTAGTTGCCAGCATTTAGTTGGGCACTCTAAGGGGACTGCCGGTGATAAGCC  
GAGAGGAAGGTGGGGATGACGTCAAGTCCTCATGGCCCTTACGGGCTGGGCTACA  
CACGTGCTACAATGGTGGTGACAGTGGGCAGCGAGACAGCGATGTCGAGCTAATC  
TCCAAAAGCCATCTCAGTTCGGATTGCACTCTGCAACTCGAGTGCATGAAGTTGGA  
ATCGCTAGTAATCGCAGATCAGCATGCTGCGGTGAATACGTTCCCGGGCCTTGTAC  
ACACCGCCCGTACACCATGGGAGTTGGTTTTACCCGAAGGTAGTGCCTAACCGC  
AAGGAGGCAGCTAACACGGTAGGGTCAGCGACTGGGGTGAAGTCGTAACAAGGT  
AGCCGTAGGGGAACCTGCGGCTGGATCACCTCCTT

>*Sphingobium yanoikuyae* NBRC 15102 (NR113730)

AACGAACGCTGGCGGCATGCCTAATACATGCAAGTCGAACGAGATCTTCGGATCTA  
GTGGCGCACGGGTGCGTAACGCGTGGGAATCTGCCCTTGGGTTCGGAATAACTTCT  
GGAAACGGAAGCTAATACCGGATGATGACGTAAGTCCAAAGATTTATCGCCCAAG  
GATGAGCCCGCGTAGGATTAGCTAGTTGGTGAGGTAAAGGCTCACCAAGGCGACG  
ATCCTTAGCTGGTCTGAGAGGATGATCAGCCACACTGGGACTGAGACACGGCCCA  
GACTCCTACGGGAGGCAGCAGTAGGGAATATTGGACAATGGGCGAAAGCCTGATC  
CAGCAATGCCGCGTGAGTGATGAAGGCCTTAGGGTTGTAAAGCTCTTTTACCCGGG  
ATGATAATGACAGTACCGGGAGAATAAGCTCCGGCTAACTCCGTGCCAGCAGCCG  
CGGTAATACGGAGGGAGCTAGCGTTGTTTCGGAATTACTGGGCGTAAAGCGCACGT  
AGGCGGCTATTCAAGTCAGAGGTGAAAGCCCCGGGGCTCAACCCCGGAAGTGCCTTT  
GAAACTAGATAGCTTGAATCCAGGAGAGGTGAGTGGAATTCCGAGTGTAGAGGTG  
AAATTCGTAGATATTCGGAAGAACCAGTGGCGAAGGCGGCTCACTGGACTGGT  
ATTGACGCTGAGGTGCGAAAGCGTGGGGAGCAAACAGGATTAGATACCCTGGTAG  
TCCACGCCGTAAACGATGATAACTAGCTGTCAGGGCACATGGTGTGTTTGGTGGCGC  
AGCTAACGCATTAAGTTATCCGCCTGGGGAGTACGGTCGCAAGATTA AAACTCAA  
GGAATTGACGGGGGCCTGCACAAGCGGTGGAGCATGTGGTTTAATTTCGAAGCAAC  
GCGCAGAACCTTACCAACGTTTGACATCCCTATCGCGGATCGTGGAGACACTTTCC  
TTCAGTTCGGCTGGATAGGTGACAGGTGCTGCATGGCTGTCGTCAGCTCGTGTCTG  
GAGATGTTGGGTTAAGTCCCGCAACGAGCGCAACCCTCGCCTTTAGTTGCCAGCAT  
TTAGTTGGGTACTCTAAAGGAACCGCCGGTGATAAGCCGGAGGAAGGTGGGGATG  
ACGTCAAGTCCTCATGGCCCTTACGCGTTGGGCTACACACGTGCTACAATGGCGAC  
TACAGTGGGCAGCCACCTCGCGAGAGGGAGCTAATCTCCAAAAGTCGTCTCAGTTC  
GGATCGTTCTCTGCAACTCGAGAGCGTGAAGGCGGAATCGCTAGTAATCGCGGATC  
AGCATGCCGCGGTGAATACGTTCCAGGCCTTGTACACACCGCCCGTACACCATG  
GGAGTTGGATTCACTCGAAGGCGTTGAGCTAACCGTAAGGAGGCAGGCGACCACA  
GTGGGTTTAGCGACTGGGGTGAAG

>*Sphingobium yanoikuyae* GIFU 9882 (NR115524)

GAACGAACGCTGGCGGCATGCCTAATACATGCAAGTCGAACGAGATCTTCGGATCT  
AGTGGCGCACGGGTGCGTAACGCGTGGGAATCTGCCCTTGGGTTCGGAATAACTTC  
TGGAACGGAAGCTAATACCGGATGATGACGTAAGTCCAAAGATTTATCGCCCAA  
GGATGAGCCCGCGTAGGATTAGCTAGTTGGTGAGGTAAAGGCTCACCAAGGCGAC  
GATCCTTAGCTGGTCTGAGAGGATGATCAGCCACACTGGGACTGAGACACGGCCC

AGACTCCTACGGGAGGCAGCAGTAGGGAATATTGGACAATGGGCGAAAGCCTGAT  
CCAGCAATGCCGCGTGAGTGATGAAGGCCTTAGGGTTGTAAAGCTCTTTACCCGG  
GATGATAATGACAGTACCGGGAGAATAAGCTCCGGCTAACTCCGTGCCAGCAGCC  
GCGGTAATACGGAGGGAGCTAGCGTTGTTTCGGAATTAAGTGGGCGTAAAGCGCACG  
TAGGCGGCTATTCAAGTCAGAGGTGAAAGCCCGGGGCTCAACCCCGGAACTGCCTT  
TGAAACTAGATAGCTTGAATCCAGGAGAGGTGAGTGAATTCGAGTGTAGAGGT  
GAAATTCGTAGATATTTCGGAAGAACACCAGTGGCGAAGGCGGCTCACTGGACTGG  
TATTGACGCTGAGGTGCGAAAGCGTGGGGAGCAAACAGGATTAGATAACCCTGGTA  
GTCCACGCCGTAAACGATGATAACTAGCTGTCAGGGCACATGGTGTTTTGGTGGCG  
CACGTAACGCATTAAGTTATCCGCCTGGGGAGTACGGTCGCAAGATTA AAACTCAA  
AGGAATTGACGGGGGCCTGCACAAGCGGTGGAGCATGTGGTTTAATTCGAAGCAA  
CGCGCAGAACCTTACCAACGTTTGACATCCCTATCGCGGATCGTGGAGACTTTC  
CTTCAGTTCGGCTGGATAGGTGACAGGTGCTGCATGGCTGTCGTCAGCTCGTGTCC  
TGAGATGTTGGGTTAAGTCCCACAACGAGCGCAACCCTCGCCTTTAGTTGCCAGCA  
TTTAGTTGGGTACTCTAAAGGANACCGCCGGTGATAAGCCGGAGGAAGGTGGGGA  
TGACGTCAAGTCCTCATGGCCCTTACGCGTTGGGCTACACACGTGCTACAATGGCG  
ACTACAGTGGGCAGCCACCTCGCGAGGAGGGAGCTAATCTCCAAAAGTCGTCTCA  
GTTTCGGATCGTTCTCTGCAACTCGAGAGCGTGAAGGCGGAATCGCTAGTAATCGCG  
GATCAGCATGCCGCGGTGAATACGTTTCCAGGCCTTGTACACACCGCCCGTACAC  
CATGGGAGTTGGATTCACTCGAAGGCGTTGAGCTAACCCTAAGGAGGCAGGCGAC  
CACAGTGGGTTTAGCGACTGGGGTGAAGTCGTAACAAGGTAGCCGTAGGGGAACC  
TGCGG

>*Sphingobium yanoikuyae* IFO 15102 (NR036767)

AGTTTGATCCTGGCTCAGAACGAACGCTGGCGGCATGCCTAATACATGCAAGTCGA  
ACGAGATCTTCGGATCGAGTGGCCACGGGTGCGTAACGCGTGGGAATCTGCCCTT  
GGGTTTCGGAATAACTTCTGGAAACGGAAGCTAATACCGGATGATGACGTAGGTCC  
AAAGATTTATCGCCAAGGATGAGCCC GCGTAGGATTAGCTAGTTGGTGAGGTAA  
AGGCTACCAAGGCGACGATCCTTAGCTGGTCTGAGAGGATGATCAGCCACTG  
GGACTGAGACACGGCCAGACTCCTACGGGAGGCAGCAGTGGGGAATATTGGACA  
ATGGGCGAAAGCCTGATCCAGCAATGCCGCGTGAGTGATGAAGGCCTTAGGGTTG  
TAAAGCTCTTTTACCCGGGATGATAATGACAGTACCGGGAGAATAAGCTCCGGCTA  
ACTCCGTGCCAGCAGCCGCGGTAATACGGAGGGAGCTAGCGTTGTTTCGGAATTAAGT  
GGGCGTAAAGCGCACGTAGGCGGCTATTCAAGTCAGAGGTGAAAGCCCGGGGCTC  
AACCCCGGAACTGCCTTTGAAACTAGATAGCTTGAATCCAGGAGAGGTGAGTGG  
ATTCCGAGTGATAGAGGTGAAATTCGTAGATATTTCGGAAGAACACCAGTTGCGAAG  
GCGGCTCACTGGACTGGTATTGACGCTGAGGTGCGAAAGCGTGGGGAGCAAACAG  
GATTAGATACCCTGGTAGTCCACGCCGTAAACGATGATAACTAGCTGTCAGGGCAC  
ATGGTGTTTTGGTGGCGCACGTAACGCATTAAGTTATCCGCCTGGGGAGTACGGTC  
GCAAGATTA AAACTCAAAGGAATTGACGGGGGCCTGCACAAGCGGTGGAGCATGT  
GGTTAATTCGAAGCAACGCGCAGAACCTTACCAACGTTTGACATCCCTATCGCGG  
ATCGTGGAGACACTTTCCTTCAGTTCGGCTGGATAGGTGACAGGTGCTGCATGGCT  
GTCGTCAGCTCGTGTGTCGTGAGATGTTGGGTTAAGTCCCACAACGAGCGCAACCCTC  
GCCTTTAGTTGCCTGCATTTAGTTGGGTACTCTAAAGGAACCGCCGGTGATAAGCC  
GGAGGAAGGTGGGGATGACGTCAAGTCCTCATGGCCCTTACGCGTTGGGCTACAC  
ACGTGCTACAATGGCGACTACAGTGGGCAGCCACCTCGCGAGAGGGAGCTAATCT  
CCAAAAGTCGTCTCAGTTCGGATCGTTCTCTGCAACTCGAGAGCGTGAAGGCGGAA  
TCGCTAGTAATCGCGGATCAGCATGCCGCGGTGAATACGTTCCAGGCCTTGTACA  
CACCGCCCGTACACCATGGGAGTTGGATTCACTCGAAGGCGTTGAGCTAACCCTA  
AGGAGGCAGGCGACCACACAGTGGGTC

>*Sphingobium herbicidovorans* NBRC 16415 (NR113843)

AACGAACGCTGGCGGCATGCCTAATACATGCAAGTCGAACGAGATCTTCGGATCTA  
GTGGCGCACGGGTGCGTAACGCGTGGGAATCTGCCCTTGGGTTCGGAATAACAGTT  
GGAAACGACTGCTAATACCGGATGATGACGTAAGTCCAAAGATTTATCGCCCAAG  
GATGAGCCCGCGTAGGATTAGCTAGTTGGTGAGGTAAAGGCTCACCAAGGCTACG  
ATCCTTAGCTGGTCTGAGAGGATGATCAGCCACACTGGGACTGAGACACGGCCCA  
GACTCCTACGGGAGGCAGCAGTAGGGAATATTGGACAATGGGCGAAAGCCTGATC  
CAGCAATGCCGCGTGAGTGATGAAGGCCTTAGGGTTGTAAAGCTCTTTTACCCGGG  
ATGATAATGACAGTACCGGGAGAATAAGCCCCGGCTAACTCCGTGCCAGCAGCCG  
CGGTAATACGGAGGGGGCTAGCGTTGTTTCGGAATTACTGGGCGTAAAGCGCACGT  
AGGCGGCGATTTAAGTCAGAGGTGAAAGCCCCGGGGCTCAACCCCGGAATAGCCTT  
TGAGACTGGATTGCTTGAACATCGGAGAGGTGAGTGGAATTCCGAGTGTAGAGGT  
GAAATTCGTAGATATTCGGAAGAACACCAGTGGCGAAGGCGGCTCACTGGACGAT  
TGTTGACGCTGAGGTGCGAAAGCGTGGGGAGCAAACAGGATTAGATAACCCTGGTA  
GTCCACGCCGTAAACGATGATAACTAGCTGCTGGGGTGCATGGCATTTCAGTGGCG  
CAGCTAACGCATTAAGTTATCCGCCTGGGGAGTACGGTCGCAAGATTA AAACTCAA  
AGGAATTGACGGGGGCCTGCACAAGCGGTGGAGCATGTGGTTTAATTCGAAGCAA  
CGCGCAGAACCTTACCAACGTTTGACATCCCTATCGCGGATCGTGGAGACACTTTC  
CTTCAGTTCGGCTGGATAGGTGACAGGTGCTGCATGGCTGTCGTCAGCTCGTGTTCG  
TGAGATGTTGGGTAAAGTCCCGCAACGAGCGCAACCCTCGCCTTTAGTTGCCATCA  
TTTAGTTGGGTACTCTAAAGGAACCGCCGGTGATAAGCCGGAGGAAGGTGGGGAT  
GACGTCAAGTCCTCATGGCCCTTACGCGTTGGGCTACACACGTGCTACAATGGCGA  
CTACAGTGGGCAGCCACTCCGCGAGGAGGAGCTAATCTCCAAAAGTCGTCTCAGTT  
CGGATCGTTCTCTGCAACTCGAGAGCGTGAAGGCGGAATCGCTAGTAATCGCGGAT  
CAGCATGCCGCGGTGAATACGTTCCAGGCCTTGTACACACCGCCCGTACACCCAT  
GGGAGTTGGTTTACCCGAAGGCAGTGCCTAACC GCAAGGAGGCAGCTGACCAC  
GGTGGGATCAGCGACTGGGGTGAAG

>Sphingobium ummariense RL-3 (NR044171)

CAGAACGAACGCTGGCGGCATGCCTAATACATGCAAGTCGAACGAAGGCTTCGGC  
CTTAGTGGCGCACGGGTGCGTAACGCGTGGGAATCTGCCCTTGGGTTCGGAATAAC  
GTCTGGAAACGGACGCTAATACCGGATGATGACGTAAGTCCAAAGATTTATCGCCC  
AGGGATGAGCCCGCGTAGGATTAGCTAGTTGGTGAGGTAAAGGCTCACCAAGGCG  
ACGATCCTTAGCTGGTCTGAGAGGATGATCAGCCACACTGGGACTGAGACACGGC  
CCAGACTCCTACGGGAGGCAGCAGTAGGGAATATTGGACAATGGGCGAAAGCCTG  
ATCCAGCAATGCCGCGTGAGTGATGAAGGCCTTAGGGTTGTAAAGCTCTTTTACCC  
GGGATGATAATGACAGTACCGGGAGAATAAGCCCCGGCTAACTCCGTGCCAGCAG  
CCGCGGTAATACGGAGGGGGCTAGCGTTGTTTCGGAATTACTGGGCGTAAAGCGCA  
CGTAGGCGGCGATTTAAGTCAGAGGTGAAAGCCCCGGGGCTCAACCCCGGAATAGC  
CTTTGAGACTGGATTGCTTGAATCCGGGAGAGGTGAGTGGAATTCCGAGTGTAGAG  
GTGAAATTCGTAGATATTCGGAAGAACACCAGTGGCGAAGGCGGCTCACTGGACC  
GGCATTGACGCTGAGGTGCGAAAGCGTGGGGAGCAAACAGGATTAGATAACCCTGG  
TAGTCCACGCCGTAAACGATGATAACTAGCTGCTGGGGCTCATGGAGTTTCAGTGG  
CGCAGCTAACGCATTAAGTTATCCGCCTGGGGAGTACGGTCGCAAGATTA AAACTC  
AAAGGAATTGACGGGGGCCTGCACAAGCGGTGGAGCATGTGGTTTAATTCGAAGC  
AACGCGCAGAACCTTACCAACGTTTGACATCCCTAGTATGGTTACCAGAGATGGTT  
TCCTTCAGTTCGGCTGGCTAGGTGACAGGTGCTGCATGGCTGTCGTCAGCTCGTGTTC  
GTGAGATGTTGGGTAAAGTCCCGCAACGAGCGCAACCCTCGCCTTTAGTTGCCATC  
ATTCAGTTGGGTACTCTAAAGGAACCGCCGGTGATAAGCCGGAGGAAGGTGGGGGA  
TGACGTCAAGTCCTCATGGCCCTTACGCGTTGGGCTACACACGTGCTACAATGGCG  
ACTACAGTGGGCAGCTATCTCGCGAGAGTGCCTAATCTCCAAAAGTCGTCTCAGT  
TCGGATCGTTCTCTGCAACTCGAGAGCGTGAAGGCGGAATCGCTAGTAATCGCGGA  
TCAGCATGCCGCGGTGAATACGTTCCAGGCCTTGTACACACCGCCCGTACACCA



TGGGAGTTGGTTTCACCCGAAGGCGCTGCGCTAACTCGCAAGAGAGGCAGGCGAC  
CACGGTGGGATCAGCGACTGGGGTGAAGTC

### Aligned and cut

>OTU586 (*Sphingobium yanoikuyae*)

AACGAACGCTGGCGGCATGCCTAATACATGCAAGTCGAACGAGA-----  
TCTTCGGATCTAGTGGCGCACGGGTGCGTAACGCGTGGG-  
AATCTGCCCTTGGGTTTCGGAATAACTTCTGGAAACGGAAGCTAATACCGGATG-  
ATGACGTAAGTCCAAAG-----  
ATTTATCGCCCAAGGATGAGCCCGCGTAGGATTAGCTAGTTGGTGGGGTAAAGGCT  
CACCAAGGCGACGATCCTTAGCTGGTCTGAGAGGATGATCAGCCACACTGGGACT  
GAGACACGGCCAGACTCCTACGGGAGGCAGCAGTAGGGAATATTGGACAATGGG  
CGAAAGCCTG-ATCCAGCAATGCCGCGTGAGTGATGAAGGCCTTAGGG-  
TTGTAAAGCTCTTTTACCCGGGATGA-----TAATG-----ACAGT-ACCGG-  
AGAATAAGCTCCGGCTAACTCCGTGCC

>OTU2089 (*Agrobacterium radiobacter*)

AACGAACGCTGGCGGCAGGCTTAACACATGCAAGTCGAACG-----  
CCCCGCAAGGGGAGTGGCAGACGGGTGAGTAACGCGTGGG-  
AACATACCCTTTCCTGCGGAATAGCTCCGGGAAACTGGAATTAATACCGCATA-  
CGCCCTACGGGGGAAAG-----  
ATTTATCGGGGAAGGATTGGCCCGCGTTGGATTAGCTAGTTGGTGGGGTAAAGGCC  
TACCAAGGCGACGATCCATAGCTGGTCTGAGAGGATGATCAGCCACATTGGGACT  
GAGACACGGCCAAACTCCTACGGGAGGCAGCAGTGGGGAATATTGGACAATGGG  
CGCAAGCCTG-ATCCAGCCATGCCGCGTGAGTGATGAAGGCCTTAGGG-  
TTGTAAAGCTCTTTCACCGATGAAGA-----TAATG-----ACGGT-  
AGTCGGAGAAGAAGCCCCGGCTAACTTCGTGCC

>OTU1492 (*Acinetobacter*)

ATTGAACGCTGGCGGCAGGCTTAACACATGCAAGTCGAGCGGAGAGA-  
GGTAGCTTGCTACTG-ATCTTAGCGGCGGACGGGTGAGTAATGCTTAGG-  
AATCTGCCTATTAGTGGGGGACAACATTTCGAAAGGAATGCTAATACCGCATA-  
CGTCCTACGGGAGAAAGCAGGGGATCTTCGGACCTTGCGCTAATAGATGAGCCTA  
AGTCGGATTAGCTAGTTGGTGGG-  
TAAAGGCCTACCAAGGCGACGATCTGTAGCGGGTCTGAGAGGATGATCCGCCACA  
CTGGGACTGAGACACGGCCAGACTCCTACGGGAGGCAGCAGTGGGGAATATTGG  
ACAATGGGCGCAAGCCTG-  
ATCCAGCCATGCCGCGTGTGTGAAGAAGGCCTTATGG-  
TTGTAAAGCACTTTAAGCGAGGAGGAGGCTACTTTAG-  
TAATACCTAGAGATAGTGGACGTT-  
ACTCGCAGAATAAGCACCGGCTAACTCCGTAGC

>OTU47 (*Chryseobacterium*)

GATGGACGCTAGCGGGAGGCCTAACACATGCAAGCCGAGCGGTAGAG----  
TTTCTTCGGAAACTTGAGAGCGGCGCACGGGTGCGTAACACGTGTGCAACCTACCT  
TTATCTGGGGGATAGCCTTTCGAAAGGAAGATTAATACCCCATATAATGATTG  
GCATCAATTATTGAAAACCTCCGGTGGATAGAGATGGGCACGCGCAAGATTAG  
ATAGTTGGTGAAGTAACGGCTACCAAGTCAATGATCTTTAGGGGTCCTGAGAGGG  
AGATCCCCCACACTGGTACTGAGACACGGACCAGACTCCTACGGGAGGCAGCAGT  
GAGGAATATTGGACAATGGGTGAGAGCCTG-  
ATCCAGCCATCCCAGCGTGAAGGATGACGGTCCTATGGATTGTAACTTCTTTTGTA

CAGGGATAAACCTACTCTCGTGAGG-----GTAGCTGAAGGT-  
 ACTGTACGAATAAGCACCGGCTAACTCCGTGCC  
 >Chryseobacterium haifense H38 (NR\_044167)  
 GATGAACGCTAGCGGGAGGCCTAACACATGCAAGCCGAGCGGTAGAG----  
 TTTCTTCGGAAACTTGAGAGCGGCGCACGGGTGCGTAACACGTGTGCAACCTACCT  
 TTATCTGGGGGATAGCCTTTTCGAAAGGAAGATTAATACCCCATATAATGATTG  
 GCATCAATTATTATTGAAAACCTCCGGTGGATAGAGATGGGCACGCGCAAGATTAG  
 ATAGTTGGTGAGGTAACGGCTCACCAAGTCAATGATCTTTAGGGGTCCTGAGAGGG  
 AGATCCCCCACACTGGTACTGAGACACGGACCAGACTCCTACGGGAGGCAGCAGT  
 GAGGAATATTGGACAATGGGTGAGAGCCTG-  
 ATCCAGCCATCCCGCGTGAAGGATGACGGTCCTATGGATTGTAACTTCTTTTGTA  
 CAGGGATAAACCTACTCTCGTGAGG-----GTAGCTGAAGGT-  
 ACTGTACGAATAAGCACCGGCTAACTCCGTGCC  
 >OTU2007 (Pseudomonas)  
 ATTGAACGCTGGCGGCAGGCCTAACACATGCAAGTCGAGCGGATGAT-  
 GGGAGCTTGCTCCTG-GATTCAGCGGCGGACGGGTGAGTAATGCCTAGG-  
 AATCTGCCTGGTAGTGGGGGACAACGTTTCGAAAGGAACGCTAATACCGCATA-  
 CGTCCTACGGGAGAAAGCAGGGGACCTTCGGGCCTTGCGCTATCAGATGAGCCTA  
 GGTCGGATTAGCTTGTGGTGAGGTAATGGCTCACCAAGGCGACGATCCGTAACGT  
 GTCTGAGAGGATGATCAGTCACACTGGAAGTGAAGACACGGTCCAGACTCCTACGG  
 GAGGCAGCAGTGGGGAATATTGGACAATGGGCGAAAGCCTG-  
 ATCCAGCCATGCCGCGTGTGTGAAGAAGGTCTTCGGA-  
 TTGTAAAGCACTTTAAGTTGGGAGGAAGGGTTGTAGATTAATACTCTGCAATTTTG-  
 ACGTTTACCGACAGAATAAGCACCGGCTAACTCTGTGCC  
 >OTU99 (Moraxella)  
 ATTGAACGCTGGCGGCAGGCTTAACACATGCAAGTCGAACGATGACTCTCTAGCTT  
 GCTAGAGATGATTAGTGGCGGACGGGTGAGTAACATTTAGG-  
 AATCTACCTAGTAGTGGGGGATAGCTCGGGGAAACTCGAATTAATACCGCATA-  
 CGACCTACGGGTGAAAGGGGGCG-----CAAGCTCT-  
 TGCTATTAGATGAGCCTAAATCAGATTAGCTAGTTGGTGGGGTAAAGGCCACCAA  
 GGCGACGATCTGTAACCTGGTCTGAGAGGATGATCAGTCACACCGGAACTGAGACA  
 CGGTCCGACTCCTACGGGAGGCAGCAGTGGGGAATATTGGACAATGGGGGCAAC  
 CCTG-ATCCAGCCATGCCGCGTGTGTGAAGAAGGCCTTTTGG-  
 TTGTAAAGCACTTTAAGCAGGGAGGAGAGGCTAATGGTTAATACCCATTAGATTAG  
 -ACGTT-ACCTGCAGAATAAGCACCGGCTAACTCTGTGCC  
 >OTU3112 (Chryseobacterium)  
 GATGAACGCTAGCGGGAGGCCTAACACATGCAAGCCGAGCGGTATTT----  
 GTTCTTCGGAACAGAGAGAGCGGCGCACGGGTGCGGAACACGTGTGCAACCTGCC  
 TTTATCTGGGGGATAGCCTTTTCGAAAGGAAGATTAATACCCCATATAATATTGAGT  
 GGCATCATTTGATATTGAAAACCTCCGGTGGATAGAGATGGGCACGCGCAAGATTA  
 GATAGTTGGTGAGGTAACGGCTCACCAAGTCAATGATCTTTAGGGGGCCTGAGAG  
 GGTGATCCCCCACACTGGTACTGAGACACGGACCAGACTCCTACGGGAGGCAGCA  
 GTGAGGAATATTGGACAATGGGTTAGCGCCTG-  
 ATCCAGCCATCCCGCGTGAAGGACGACGGCCCTATGGGTTGTAACTTCTTTTGTA  
 TAGGGATAAACCTACTCTCGTGAGA-----GTAGCTGAAGGT-  
 ACTATACGAATAAGCACCGGCTAACTCCGTGCC  
 >OTU1844 (Brevundimonas)  
 AGCGAACGCTGGCGGCAGGCCTAACACATGCAAGTCGAACGGA-----  
 CCCTTCGGGGTTAGTGGCGGACGGGTGAGTAACACGTGGG-  
 AACGTGCCTTTAGGTTTCGGAATAGCTCCTGGAAACGGGTGGTAATGCCGAATG-  
 TGCCCTTCGGGGGAAAG-----

ATTTATCGCCTTTAGAGCGGCCCGCGTCTGATTAGCTAGTTGGTGAGGTAACGGCT  
CACCAAGGCGACGATCAGTAGCTGGTCTGAGAGGATGACCAGCCACACTGGGACT  
GAGACACGGCCCAGACTCCTACGGGAGGCAGCAGTGGGGAATCTTGCGCAATGGG  
CGAAAGCCTG-ACGCAGCCATGCCGCGTGAATGATGAAGGTCTTAGGA-  
TTGTAAAATTCTTTCACCGGGGACGA-----TAATG-----ACGGT-  
ACCCGGAGAAGAAGCCCCGGCTAACTTCGTGCC

>OTU893 (*Acinetobacter*)

ATTGAACGCTGGCGGCAGGCTTAACACATGCAAGTCGAGCGGGGAAA-  
GGTAGCTTGCTACCT-GACCTAGCGGCGGACGGGTGAGTAATGCTTAGG-  
AATCTGCCTATTAGTGGGGGACAACATTCCGAAAGGAATGCTAATACCGCATA-  
CGCCCTACGGGGGAAAGCAGGGGATCTTCGGACCTTGCGCTAATAGATGAGCCTA  
AGTCAGATTAGCTAGTTGGTGGGGTAAAGGCCTACCAAGGCGACGATCTGTAGCG  
GGTCTGAGAGGATGATCCGCCACACTGGGACTGAGACACGGCCCAGACTCCTACG  
GGAGGCAGCAGTGGGGAATATTGGACAATGGGCGAAAGCCTG-  
ATCCAGCCATGCCGCGTGTGTGAAGAAGGCCTTTTGG-  
TTGTAAAGCACTTTAAGCGAGGAGGAGGCTACTTAGATTAATACTCTAGGATAGTG  
GACGTT-ACTCGCAGAATAAGCACCGGCTAACTCTGTGCC

>OTU2385 (*Acinetobacter*)

ATTGAACGCTGGCGGCAGGCTTAACACATGCAAGTCGAGCGGAGAGA-  
AGTAGCTTGCTACTG-ATCTTAGCGGCGGACGGGTGAGTAATACTTAGG-  
AATCTGGCTATTAGTGGGGGACAACATTTTCGAAAGGGATGCTAATACCGCATA-  
CGTCCTACGGGAGAAAGCAGGGGATCTTCGGACCTTGCGCTAATAGATGAGCCTA  
AGTCGGATTAGCTAGTTGGTGGGGTAAAGGCCTACCAAGGCGACGATCTGTAGCG  
GGTCTGAGAGGATGATCCGCCACACTGGGACTGAGACACGGCCCAGACTCCTACG  
GGAGGCAGCAGTGGGGAATATTGGACAATGGGGGGAACCCTGGATCCAGCCATGC  
CGCGTGTGTGAAGAAGGCCTTATGG-  
TTGTAAAGCACTTTAAGCGAGGAGGAGGGTACTGGTATTAATACTACCAGGTACTG  
GACGTT-ACTCGCAGAATAAGCACCGGCTAACTCTGTGCC

>*Moraxella osloensis* DSM 6998 (NR113392)

ATTGAACGCTGGCGGCAGGCTTAACACATGCAAGTCGAACGATGACTCTCTAGCTT  
GCTAGAGATGATTAGTGGCGGACGGGTGAGTAACATTTAGG-  
AATCTACCTAGTAGTGGGGGATAGCTCGGGGAAACTCGAATTAATAACCGCATA-  
CGACCTACGGGTGAAAGGGGGCG-----CAAGCTCT-  
TGCTATTAGATGAGCCTAAATCAGATTAGCTAGTTGGTGGGGTAAAGGCCACCAA  
GGCGACGATCTGTA ACTGGTCTGAGAGGATGATCAGTCACACCGGAACTGAGACA  
CGGTCCGGACTCCTACGGGAGGCAGCAGTGGGGAATATTGGACAATGGGGGCAAC  
CCTG-ATCCAGCCATGCCGCGTGTGTGAAGAAGGCCTTTTGG-  
TTGTAAAGCACTTTAAGCAGGGAGGAGAGGCTAATGGTTAATAACCCATTAGATTAG  
-ACGTT-ACCTGCAGAATAAGCACCGGCTAACTCTGTGCC

>*Moraxella osloensis* ATCC 19976 (NR113391)

ATTGAACGCTGGCGGCAGGCTTAACACATGCAAGTCGAACGATGACTCTCTAGCTT  
GCTAGAGATGATTAGTGGCGGACGGGTGAGTAACATTTAGG-  
AATCTACCTAGTAGTGGGGGATAGCTCGGGGAAACTCGAATTAATAACCGCATA-  
CGACCTACGGGTGAAAGGGGGCG-----CAAGCTCT-  
TGCTATTAGATGAGCCTAAATCAGATTAGCTAGTTGGTGGGGTAAAGGCCACCAA  
GGCGACGATCTGTA ACTGGTCTGAGAGGATGATCAGTCACACCGGAACTGAGACA  
CGGTCCGGACTCCTACGGGAGGCAGCAGTGGGGAATATTGGACAATGGGGGCAAC  
CCTG-ATCCAGCCATGCCGCGTGTGTGAAGAAGGCCTTTTGG-  
TTGTAAAGCACTTTAAGCAGGGAGGAGAGGCTAATGGTTAATAACCCATTAGATTAG  
-ACGTT-ACCTGCAGAATAAGCACCGGCTAACTCTGTGCC

>*Moraxella osloensis* A1920 (NR104936)

ATTGAACGCTGGCGGCAGGCTTAACACATGCAAGTCGAACGATGACTCTCTAGCTT  
GCTAGAGATGATTAGTGGCGGACGGGTGAGTAACATTTAGG-  
AATCTACCTAGTAGTGGGGGATAGCTCGGGGAAACTCGAATTAATACCGCATA-  
CGACCTACGGGTGAAAGGGGGCG----CAAGCTCT-  
TGCTATTAGATGAGCCTAAATCAGATTAGCTAGTTGGTGGGGTAAAGGCCACCAA  
GGCGACGATCTGTAAGTGGTCTGAGAGGATGATCAGTCACACCGGAACTGAGACA  
CGGTCCGGACTCCTACGGGAGGCAGCAGTGGGGAATATTGGACAATGGGGGCAAC  
CCTG-ATCCAGCCATGCCGCGTGTGTGAAGAAGGCCTTTTGG-  
TTGTAAAGCACTTTAAGCAGGGAGGAGAGGCTAATGGTTAATACCCATTAGATTAG  
-ACGTT-ACCTGCAGAATAAGCACCGGCTAACTCTGTGCC

>Enhydrobacter aerosaccus G (NR029005)

ATTGAACGCTGGCGGCAGGCTTAACACATGCAAGTCGAACGATGACTCTCTAGCTT  
GCTAGAGATGATTAGTGGCGGACGGGTGAGTAATATTTAGG-  
AATCTGCCTAGTAGTGGGGGATAGCTCGGGGAAACTCGAATTAATACCGCATA-  
CGACCTACGGGTGAAAGGGGGCG----CAAGMTCT-  
TGCTATTAGATGAGCCTAAATCAGATTAGCTAGTTGGTGGGGTAAAGGCCACCAA  
GGCGACGATCTGTAAGTGGTCTGAGAGGATGATCAGTCACACCGGAACTGAGACA  
CGGTCCGGACTCCTACGGGAGGCAGCAGTGGGGAATATTGGACAATGGGGGCAAC  
CCTG-ATCCAGCCATGCCGCGTGTGTGAAGAAGGCCTTTTGG-  
TTGTAAAGCACTTTAAGCAGGGAGGAGAGGCTAATGGTTAATACCCATTAGATTAG  
-ACGTT-ACCTGCAGAATAAGCACCGGCTAACTCTGTGCC

>Moraxella lincolni LMG 5127 (NR117693)

ATTGAACGCTGGCGGCAGGCTTAACACATGCAAGTCGAACGAAGAGG-  
TCTAGCTTGCTAGAC-TGATTAGTGGCGAACGGGTGAGTAACATTTAGG-  
AATCTACCTTATAGAGGGGGATAGCTCGGGGAAACTCGAATTAATACCGCATA-  
CGACCTACGGGTGAAAGGGGGCG----CAAGCTCT-  
TGCTATAAGATGAGCCTAAACCAGATTAGCTAGTTGGTGGGGTAAAGGCCTACCAA  
GGCGACGATCTGTAGCTGGTCTGAGAGGATGATCAGCCACACTGGGACTGAGACA  
CGGCCCAGACTCCTACGGGAGGCAGCAGTGGGGAATATTGGACAATGGGCGAAAG  
CCTG-ATCCAGCCATGCCGCGTGTGTGAAGAAGGCCTTATGG-  
TTGTAAAGCACTTTAAGTGGGGAGGAAAAGCTTATGGATAACACCCATAGGTTCTG  
-ACGTT-ACCCACAGAATAAGCACCGGCTAACTCTGTGCC

>Moraxella lincolni CCUG 9405 (NR117189)

ATTGAACGCTGGCGGCAGGCTTAACACATGCAAGTCGAACGAAGAGG-  
TCTAGCTTGCTAGAC-TGATTAGTGGCGAACGGGTGAGTAACATTTAGG-  
AATCTACCTTATAGAGGGGGATAGCTCGGGGAAACTCGAATTAATACCGCATA-  
CGACCTACGGGTGAAAGGGGGCG----CAAGCTCT-  
TGCTATAAGATGAGCCTAAACCAGATTAGCTAGTTGGTGGGGTAAAGGCCTACCAA  
GGCGACGATCTGTAGCTGGTCTGAGAGGATGATCAGCCACACTGGGACTGAGACA  
CGGCCCAGACTCCTACGGGAGGCAGCAGTGGGGAATATTGGACAATGGGCGAAAG  
CCTG-ATCCAGCCATGCCGCGTGTGTGAAGAAGGCCTTATGG-  
TTGTAAAGCACTTTTAAAGTGGGGAGAAAAGCTTATGGATAACACCCATAGGTTCTG  
-ACGTT-ACCCACAGAATAAGCACCGGCTAACTCTGTGCC

>Chryseobacterium hominis NF802 (NR042517.2)

GATGAACGCTAGCGGGAGGCCTAACACATGCAAGCCGAGCGGTATTT----  
GTTCTTCGGAACAGAGAGAGCGGCGCACGGGTGCGGAACACGTGTGCAACCTGCC  
TTTATCTGGGGGATAGCCTTTCGAAAGGAAGATTAATACCCATAATATATTGAGT  
GGCATCATTTGATATTGAAAACCTCCGGTGGATAGAGATGGGCACGCGCAAGATTA  
GATAGTTGGTGAAGTAAACGGCTCACCAAGTCAATGATCTTTAGGGGGCCTGAGAG  
GGTGATCCCCCACACTGGTACTGAGACACGGACCAGACTCCTACGGGAGGCAGCA  
GTGAGGAATATTGGACAATGGGTTAGCGCCTG-

ATCCAGCCATCCCGCGTGAAGGACGACGGCCCTATGGGTTGTAACTTCTTTTGTA  
TAGGGATAAACCTACTCTCGTGAGA-----GTAGCTGAAGGT-  
ACTATACGAATAAGCACCGGCTAACTCCGTGCC

>*Chryseobacterium hagamense* RHA2-9 (NR115852)

GATGAACGCTAGCGGGAGGCCTAACACATGCAAGCTGAGCGGTATTT----  
GTCTTTCGGGACAGAGAGAGCGGCGTACGGGTGCGGAACACGTGTGCAACCTGCC  
TTTATCTGGGGGATAGCCTTTCGAAAGGAAGATTAATACCCCATACATATTGAGT  
GGCATCACTTGATATTGAAAACCTCCGGTGGATAGAGATGGGCACGCGCAAGATTA  
GATAGTTGGTGAGGTAACGGCTCACCAAGTCGATGATCTTTAGGGGGCCTGAGAG  
GGTGATCCCCCACACTGGTACTGAGACACGGACCAGACTCCTACGGGAGGCAGCA  
GTGAGGAATATTGGACAATGGGTTAGCGCCTG-

ATCCAGCCATCCCGCGTGAAGGACGACGGCCCTATGGGTTGTAACTTCTTTTGTA  
CAGGGATAAACCTACCCTCGTGAGG-----GTAGCTGAAGGT-

ACTGTACGAATAAGCACCGGCTAACTCCGTGCC

>*Chryseobacterium bovis* H9 (NR044166)

GATGAACGCTAGCGGGAGGCCTAACACATGCAAGCCGAGCGGTAGAG----  
TATCTTCGGATACTTGAGAGCGGCGCACGGGTGCGGAACACGTGTGCAACCTGCCT  
TTATCTGGGGGATAGCCTTTCGAAAGGAAGATTAATACCCCATATATATTTGATG  
GCATCATTAGATATTGAAAACCTCCGGTGGATAGAGATGGGCACGCGCAAGATTAG  
TTAGTTGGTGAGGTAACGGCTCACCAAGGCGATGATCTTTAGGGGGCCTGAGAGG  
GTGATCCCCCACACTGGTACTGAGACACGGACCAGACTCCTACGGGAGGCAGCAG  
TGAGGAATATTGGACAATGGGTTAGCGCCTG-

ATCCAGCCATCCCGCGTGAAGGACGACGGCCCTATGGGTTGTAACTTCTTTTGTA  
TAGGGATAAACCTACTCTCGTGAGA-----GTAGCTGAAGGT-

ACTATACGAATAAGCACCGGCTAACTCCGTGCC

>*Chryseobacterium proteolyticum* 9670 (NR112113)

GATGAACGCTAGCGGGAGGCCTAACACATGCAAGCCGAGCGGTATAG----  
ATCTTTCGGGATCTAGAGAGCGGCGCACGGGTGCGGAACACGTGTGCAACCTACCT  
TTATCAGGGGGATAGCCTTTCGAAAGGAAGATTAATACCCCATATATATTTGATG  
GCATCATTAGATATTGAAAACCTCCGGTGGATAGAGATGGGCACGCGCAAGATTAG  
ATAGTTGGTGAGGTAACGGCTCACCAAGTCAATGATCTTTAGGGGGCCTGAGAGG  
GTGATCCCCCACACTGGTACTGAGACACGGACCAGACTCCTACGGGAGGCAGCAG  
TGAGGAATATTGGACAATGGGTTGAGAGCCTG-

ATCCAGCCATCCCGCGTGAAGGATGACGGCCCTATGGGTTGTAACTTCTTTTGTA  
TAGGGATAAACCTACCCTCGTGAGG-----GTAGCTGAAGGT-

ACTATACGAATAAGCACCGGCTAACTCCGTGCC

>*Chryseobacterium arthrosphaerae* CC-VM-7 (NR116977)

GATGAACGCTAGCGGGAGGCCTAACACATGCAAGCCGAGCGGTAGAG----  
ATCTTTCGGGATCTTGAGAGCGGCGTACGGGTGCGGAACACGTGTGCAACCTGCCT  
TTATCAGGGGGATAGCCTTTCGAAAGGAAGATTAATACCCCATATATATCGAGTG  
GCATCACTTGATATTGAAAACCTCCGGTGGATAGAGATGGGCACGCGCAAGATTAG  
ATAGTTGGTGAGGTAACGGCTCACCAAGTCTGCGATCTTTAGGGGGCCTGAGAGGG  
TGATCCCCCACACTGGTACTGAGACACGGACCAGACTCCTACGGGAGGCAGCAGT  
GAGGAATATTGGACAATGGGTTGCGAGCCTG-

ATCCAGCCATCCCGCGTGAAGGATGACGGCCCTATGGGTTGTAACTTCTTTTGTA  
TAGGGATAAACCTACCCTCGTGAGG-----GTAGCTGAAGGT-

ACTATACGAATAAGCACCGGCTAACTCCGTGCC

>*Acinetobacter johnsonii* ATCC 17909 (NR117624)

ATTGAACGCTGGCGGCAGGCTTAACACATGCAAGTCGAGCGGGGAAA-  
GGTAGCTTGCTACCT-AACCTAGCGGCGGACGGGTGAGTAATGCTTAGG-  
AATCTGCCTATTAGTGGGGGACAACATTCCGAAAGGAATGCTAATACCGCATA-

CGCCCTACGGGGGAAAGCAGGGGATCTTCGGACCTTGCGCTAATAGATGAGCCTA  
AGTCAGATTAGCTAGTTGGTGGGGTAAAGGCCTACCAAGGCGACGATCTGTAGCG  
GGTCTGAGAGGATGATCCGCCACACTGGGACTGAGACACGGCCCAGACTCCTACG  
GGAGGCAGCAGTGGGGAATATTGGACAATGGGCGAAAGCCTG-  
ATCCAGCCATGCCGCGTGTGTGAAGAAGGCCTTTTGG-  
TTGTAAAGCACTTTAAGCGAGGAGGAGGCTACTTGGATTAATACTCTAGGATAGTG  
GACGTT-ACTCGCAGAATAAGCACCGGCTAACTCTGTGCC  
>Acinetobacter johnsonii Mannheim 3865/60 (NR044975)  
ATTGAACGCTGGCGGCAGGCTTAACACATGCAAGTCGAGCGGGGAGA-  
GGTAGCTTGCTACCT-AACCTAGCGGCGGACGGGTGAGTAATGCTTAGG-  
AATCTGCCTATTAGTGGGGGACAACATTCCGAAAGGAATGCTAATACCGCATA-  
CGTCCTACGGGGGAAAGCAGGGGATCTTCGGACCTTGCGCTAATAGATGAGCCTA  
AGTCAGATTAGCTAGTTGGTGGGGTAAAGGCCTACCAAGGCGACGATCTGTAGCG  
GGTCTGAGAGGATGATCCGCCACACTGGGACTGAGACACGGCCCAGACTCCTACG  
GGAGGCAGCAGTGGGGAATATTGGACAATGGGCGGAAGCCTG-  
ATCCAGCCATGCCGCGTGTGTGAAGAAGGCCTTTTGG-  
TTGTAAAGCACTTTAAGCGAGGAGGAGGCTACTTGGATTAATACTCTAGGATAGTG  
GACGTT-ACTCGCAGAATAAGCACCGGCTAACTCTGTGCC  
>Acinetobacter haemolyticus ATCC 17906 (NR117622)  
ATTGAACGCTGGCGGCAGGCTTAACACATGCAAGTCGAGCGGGGAAG-  
GGTAGCTTGCTACCT-AACCTAGCGGCGGACGGGTGAGTAATGCTTAGG-  
AATCTGCCTATTAGTGGGGGACAACATTCCGAAAGGAATGCTAATACCGCATA-  
CGTCCTACGGGAGAAAGCAGGGGATCTTCGGACCTTGCGCTAATAGATGAGCCTA  
AGTCGGATTAGCTAGTTGGTGGGGTAAAGGCCTACCAAGGCGACGATCTGTAGCG  
GGTCTGAGAGGATGATCCGCCACACTGGGACTGAGACACGGCCCAGACTCCTACG  
GGAGGCAGCAGTGGGGAATATTGGACAATGGGCGGAAGCCTG-  
ATCCAGCCATGCCGCGTGTGTGAAGAAGGCCTTTTGG-  
TTGTAAAGCACTTTAAGCGAGGAGGAGGCTACTCTAGTTAATACCTAGAGATAGTG  
GACGTT-ACTCGCAGAATAAGCACCGGCTAACTCTGTGCC  
>Acinetobacter oleivorans DR1 (NR102814)  
ATTGAACGCTGGCGGCAGGCTTAACACATGCAAGTCGAGCGGAGAGA-  
GGTAGCTTGCTACTG-ATCTTAGCGGCGGACGGGTGAGTAATGCTTAGG-  
AATCTGCCTATTAGTGGGGGACAACATTTCCGAAAGGAATGCTAATACCGCATA-  
CGTCCTACGGGAGAAAGCAGGGGATCTTCGGACCTTGCGCTAATAGATGAGCCTA  
AGTCGGATTAGCTAGTTGGTGGGGTAAAGGCCTACCAAGGCGACGATCTGTAGCG  
GGTCTGAGAGGATGATCCGCCACACTGGGACTGAGACACGGCCCAGACTCCTACG  
GGAGGCAGCAGTGGGGAATATTGGACAATGGGCGGAAGCCTG-  
ATCCAGCCATGCCGCGTGTGTGAAGAAGGCCTTATGG-  
TTGTAAAGCACTTTAAGCGAGGAGGAGGCTACTTTAGTTAATACCTAGAGATAGTG  
GACGTT-ACTCGCAGAATAAGCACCGGCTAACTCTGTGCC  
>Acinetobacter pittii ATCC 19004 (NR117621)  
ATTGAACGCTGGCGGCAGGCTTAACACATGCAAGTCGAGCGGAGAGA-  
GGTAGCTTGCTACTG-ATCTTAGCGGCGGACGGGTGAGTAATGCTTAGG-  
AATCTGCCTATTAGTGGGGGACAACATTTCCGAAAGGAATGCTAATACCGCATA-  
CGTCCTACGGGAGAAAGCAGGGGATCTTCGGACCTTGCGCTAATAGATGAGCCTA  
AGTCGGATTAGCTAGTTGGTGGGGTAAAGGCCTACCAAGGCGACGATCTGTAGCG  
GGTCTGAGAGGATGATCCGCCACACTGGGACTGAGACACGGCCCAGACTCCTACG  
GGAGGCAGCAGTGGGGAATATTGGACAATGGGCGCAAGCCTG-  
ATCCAGCCATGCCGCGTGTGTGAAGAAGGCCTTATGG-  
TTGTAAAGCACTTTAAGCGAGGAGGAGGCTACTTTAGTTAATACCTAGAGATAGTG  
GACGTT-ACTCGCAGAATAAGCACCGGCTAACTCTGTGCC

>Acinetobacter baumannii DSM 30007 (NR117677)

ATTGAACGCTGGCGGCAGGCTTAACACATGCAAGTCGAGCGGGGGAA-  
GGTAGCTTGCTACCG-GACCTAGCGGCGGACGGGTGAGTAATGCTTAGG-  
AATCTGCCTATTAGTGGGGGACAACATCTCGAAAGGGATGCTAATACCGCATA-  
CGTCCTACGGGAGAAAGCAGGGGATCTTCGGACCTTGCGCTAATAGATGAGCCTA  
AGTCGGATTAGCTAGTTGGTGGGGTAAAGGCCTACCAAGGCGACGATCTGTAGCG  
GGTCTGAGAGGATGATCCGCCACACTGGGACTGAGACACGGCCCAGACTCCTACG  
GGAGGCAGCAGTGGGGAATATTGGACAATGGGGGGAACCCTG-  
ATCCAGCCATGCCGCGTGTGTGAAGAAGGCCTTATGG-  
TTGTAAAGCACTTTAAGCGAGGAGGAGGCTACTTTAGTTAATACCTAGAGATAGTG  
GACGTT-ACTCGCAGAATAAGCACCGGCTAACTCTGTGCC

>Acinetobacter junii Mannheim 2723/59 (NR119360)

ATTGAACGCTGGCGGCAGGCTTAACACATGCAAGTCGAGCGGAGATG-  
AGGTGCTTGACCTT-ATCTTAGCGGCGGACGGGTGAGTAATGCTTAGG-  
AATCTGCCTATTAGTGGGGGACAACATTCCGAAAGGAATGCTAATACCGCATA-  
CGTCCTACGGGAGAAAGCAGGGGATCTTCGGACCTTGCGCTAATAGATGAGCCTA  
AGTCGGATTAGCTAGTTGGTGGGGTAAAGGCCTACCAAGGCGACGATCTGTAGCG  
GGTCTGAGAGGATGATCCGCCACACTGGGACTGAGACACGGCCCAGACTCCTACG  
GGAGGCAGCAGTGGGGAATATTGGACAATGGGGGGAACCCTG-  
ATCCAGCCATGCCGCGTGTGTGAAGAAGGCCTTATGG-  
TTGTAAAGCACTTTAAGCGAGGAGGAGGCTACTGAGACTAATACTCTTGGATAGTG  
GACGTT-ACTCGCAGAATAAGCACCGGCTAACTCTGTGCC

>Acinetobacter calcoaceticus ATCC 23055 (NR117619)

ATTGAACGCTGGCGGCAGGCTTAACACATGCAAGTCGAGCGGAGTGA-  
TGGTGCTTGCACTAT-CACTTAGCGGCGGACGGGTGAGTAATGCTTAGG-  
AATCTGCCTATTAGTGGGGGACAACATTTTCGAAAGGAATGCTAATACCGCATA-  
CGTCCTACGGGAGAAAGCAGGGGATCTTCGGACCTTGCGCTAATAGATGAGCCTA  
AGTCGGATTAGCTAGTTGGTGGGGTAAAGGCCTACCAAGGCGACGATCTGTAGCG  
GGTCTGAGAGGATGATCCGCCACACTGGGACTGAGACACGGCCCAGACTCCTACG  
GGAGGCAGCAGTGGGGAATATTGGACAATGGGCGCAAGCCTG-  
ATCCAGCCATGCCGCGTGTGTGAAGAAGGCCTTATGG-  
TTGTAAAGCACTTTAAGCGAGGAGGAGGCTACTGAAGTTAATACTTCAGATAGTG  
GACGTT-ACTCGCAGAATAAGCACCGGCTAACTCTGTGCC

>Acinetobacter septicus AK001 (NR116071)

ATTGAACGCTGGCGGCAGGCTTAACACATGCAAGTCGAGCGGAGATG-  
AGGTGCTTGACCTT-ATCTTAGCGGCGGACGGGTGAGTAATACTTAGG-  
AATCTGGCTATTAGTGGGGGACAACATTTTCGAAAGGGATGCTAATACCGCATA-  
CGTCCTACGGGAGAAAGCAGGGGATCTTCGGACCTTGCGCTAATAGATGAGCCTA  
AGTCGGATTAGCTAGTTGGTGGGGTAAAGGCCTACCAAGGCGACGATCTGTAGCG  
GGTCTGAGAGGATGATCCGCCACACTGGGACTGAGACACGGCCCAGACTCCTACG  
GGAGGCAGCAGTGGGGAATATTGGACAATGGGGGGAACCCTG-  
ATCCAGCCATGCCGCGTGTGTGAAGAAGGCCTTATGG-  
TTGTAAAGCACTTTAAGCGAGGAGGAGGGTACTGGTATTAATACTACCAGCTACTG  
GACGTT-ACTCGCAGAATAAGCACCGGCTAACTCTGTGCC

>Brevundimonas diminuta NBRC 12697 (NR113602)

AGCGAACGCTGGCGGCAGGCCTAACACATGCAAGTCGAACGGA-----  
CCCTTCGGGGTTAGTGGCGGACGGGTGAGTAACACGTGGG-  
AACGTGCCTTTAGGTTTCGGAATAGCTCCTGGAACGGGTGGTAATGCCGAATG-  
TGCCCTTCGGGGGAAAG-----  
ATTTATCGCCTTTAGAGCGGCCCGCGTCTGATTAGCTAGTTGGTGGAGGTAACGGCT  
CACCAAGGCGACGATCAGTAGCTGGTCTGAGAGGATGACCAGCCACACTGGGACT

GAGACACGGCCCAGACTCCTACGGGAGGCAGCAGTGGGGAATCTTGCGCAATGGG  
CGAAAGCCTG-ACGCAGCCATGCCGCGTGAATGATGAAGGTCTTAGGA-  
TTGTAAAATTCTTTCACCGGGGACGA-----TAATG-----ACGGT-  
ACCCGGAGAAGAAGCCCCGGCTAACTTCGTGCC  
>Brevundimonas diminuta LMG 2089 (NR114708)  
AGCGAACGCTGGCGGCAGGCCTAACACATGCAAGTCGAACGGA-----  
CCCTTCGGGGTTAGTGGCGGACGGGTGAGTAACACGTGGG-  
AACGTGCCTTTAGGTTTCGGAATAGCTCCTGGAAACGGGTGGTAATGCCGAATG-  
TGCCCTTCGGGGGAAAG-----  
ATTTATCGCCTTTAGAGCGGCCCGCGTCTGATTAGCTAGTTGGTGAGGTAACGGCT  
CACCAAGGCGACGATCAGTAGCTGGTCTGAGAGGATGACCAGCCACACTGGGACT  
GAGACACGGCCCAGACTCCTACGGGAGGCAGCAGTGGGGAATCTTGCGCAATGGG  
CGAAAGCCTG-ACGCAGCCATGCCGCGTGAATGATGAAGGTCTTAGGA-  
TTGTAAAATTCTTTCACCGGGGACGA-----TAATG-----ACGGT-  
ACCCGGAGAAGAAGCCCCGGCTAACTTCGTGCC  
>Brevundimonas staleyi FWC43 (NR114710)  
AGCGAACGCTGGCGGCAGGCCTAACACATGCAAGTCGAACGGA-----  
CCCTTCGGGGTTAGTGGCGGACGGGTGAGTAACACGTGGG-  
AACGTGCCTTTAGGTTTCGGAATAGCTCCTGGAAACGGGTGGTAATGCCGAATG-  
TGCCCTTCGGGGGAAAG-----  
ATTTATCGCCTTTAGAGCGGCCCGCGTCTGATTAGCTAGTTGGTGAGGTAAGGCT  
CACCAAGGCGACGATCAGTAGCTGGTCTGAGAGGATGACCAGCCACATTGGGACT  
GAGACACGGCCCAAACCTCCTACGGGAGGCAGCAGTGGGGAATCTTGCGCAATGGG  
CGAAAGCCTG-ACGCAGCCATGCCGCGTGAATGATGAAGGTCTTAGGA-  
TTGTAAAATTCTTTCACCGGGGACGA-----TAATG-----ACGGT-  
ACCCGGAGAAGAAGCCCCGGCTAACTTCGTGCC  
>Brevundimonas bullata IAM 13153 (NR025831)  
AGCGAACGCTGGCGGCAGGCCTAACACATGCAAGTCGAACGGA-----  
CCCTTCGGGGTTAGTGGCGGACGGGTGAGTAACACGTGGG-  
AACGTGCCTTTAGGTTTCGGAATAGCTCCTGGAAACGGGTGGTAATGCCGAATG-  
TGCCCTTCGGGGGAAAG-----  
ATTTATCGCCTTTAGAGCGGCCCGCGTCTGATTAGCTAGTTGGTGAGGTAATGGCT  
CACCAAGGCGACGATCAGTAGCTGGTCTGAGAGGATGACCAGCCACATTGGGACT  
GAGACACGGCCCAAACCTCCTACGGGAGGCAGCAGTGGGGAATCTTGCGCAATGGG  
CGAAAGCCTG-ACGCAGCCATGCCGCGTGAATGATGAAGGTCTTAGGA-  
TTGTAAAATTCTTTCACCGGGGACGA-----TAATG-----ACGGT-  
ACCCGGAGAAGAAGCCCCGGCTAACTTCGTGCC  
>Brevundimonas abyssalis TAR-001 (NR114308)  
AGCGAACGCTGGCGGCAGGCCTAACACATGCAAGTCGAACGGA-----  
CCCTTCGGGGTTAGTGGCGGACGGGTGAGTAACACGTGGG-  
AACGTGCCTTTAGGTTTCGGAATAAGCCCGGAAACTGGGTCTAATACCGAATG-  
TGCCCTTCGGGGGAAAG-----  
ATTTATCGCCTTTAGAGCGGCCCGCGTCTGATTAGCTAGTTGGTGAGGTAAGGCT  
CACCAAGGCGACGATCAGTAGCTGGTCTGAGAGGATGATCAGCCACACTGGGACT  
GAGACACGGCCCAGACTCCTACGGGAGGCAGCAGTGGGGAATCTTGCGCAATGGG  
CGAAAGCCTG-ACGCAGCCATGCCGCGTGAATGATGAAGGTCTTAGGA-  
TTGTAAAATTCTTTCACCGGGGACGA-----TAATG-----ACGGT-  
ACCCGGAGAAGAAGCCCCGGCTAACTTCGTGCC  
>Brevundimonas lenta DS-18 (NR044186)  
AGCGAACGCTGGCGGCAGGCCTAACACATGCAAGTCGAACGGA-----  
CCTTTCGGGGTTAGTGGCGGACGGGTGAGTAACACGTGGG-



AACGTGCCTTTAGGTTTCGGAATAGCTCCTGGAAACGGGTGGTAATGCCGAATG-  
TGCCCTTCGGGGGAAAG-----

ATTTATCGCCTTTAGAGCGGCCCGCGTCTGATTAGCTAGTTGGTGAGGTAAAGGCT  
CACCAAGGCTACGATCAGTAGCTGGTCTGAGAGGATGACCAGCCACATTGGGACT  
GAGACACGGCCAACTCCTACGGGAGGCAGCAGTGGGGAATCTTGCGCAATGGG  
CGAAAGCCTG-ACGCAGCCATGCCGCGTGGATGATGAAGGTCTTAGGA-  
TTGTAAAATCCTTTCACCGGTGAAGA-----TAATG-----ACTGT-  
AGCCGGAGAAGAAGCCCCGGCTAACTTCGTGCC

>Acinetobacter ursingii DSM 16037(AIEA01000080)

ATTGAACGCTGGCGGCAGGCTTAACACATGCAAGTCGAGCGGAGAGA-  
GGTAGCTTGCTACTG-ATCTTAGCGGCGGACGGGTGAGTAATACTTAGG-  
AATCTGGCTATTAGTGGGGGACAACATTTGAAAGGGATGCTAATACCGCATA-  
CGTCCTACGGGAGAAAGCAGGGGATCTTCGGACCTTGCGCTAATAGATGAGCCTA  
AGTCGGATTAGCTAGTTGGTGGGGTAAAGGCCTACCAAGGCGACGATCTGTAGCG  
GGTCTGAGAGGATGATCCGCCACACTGGGACTGAGACACGGCCCAGACTCCTACG  
GGAGGCAGCAGTGGGGAATATTGGACAATGGGGGGAACCCTG-  
ATCCAGCCATGCCGCGTGTGTGAAGAAGGCCTTATGG-  
TTGTAAAGCACTTTAAGCGAGGAGGAGGGTACTGGTATTAATACTACCAGGTACTG  
GACGTT-ACTCGCAGAATAAGCACCGGCTAACTCTGTGCC

>Acinetobacter seifertii LUH 1472 (NR134684)

ATTGAACGCTGGCGGCAGGCTTAACACATGCAAGTCGAGCGGAGAGA-  
GGTAGCTTGCTACTG-ATCTTAGCGGCGGACGGGTGAGTAATGCTTAGG-  
AATCTGCCTATTAGTGGGGGACAACATCTCGAAAGGGATGCTAATACCGCATA-  
CGTCCTACGGGAGAAAGCAGGGGATCTTCGGACCTTGCGCTAATAGATGAGCCTA  
AGTCGGATTAGCTAGTTGGTGGGGTAAAGGCCTACCAAGGCGACGATCTGTAGCG  
GGTCTGAGAGGATGATCCGCCACACTGGGACTGAGACACGGCCCAGACTCCTACG  
GGAGGCAGCAGTGGGGAATATTGGACAATGGGGGGAACCCTG-  
ATCCAGCCATGCCGCGTGTGTGAAGAAGGCCTTATGG-  
TTGTAAAGCACTTTAAGCGAGGAGGAGGCTACTTTAGTTAATACTAGAGATAGTG  
GACGTT-ACTCGCAGAATAAGCACCGGCTAACTCTGTGCC

>Pseudomonas parafulva NBRC 16636 (NR\_113856)

ATTGAACGCTGGCGGCAGGCCTAACACATGCAAGTCGAGCGGATGAC-  
GGGAGCTTGCTCCTT-GATTCAGCGGCGGACGGGTGAGTAATGCCTAGG-  
AATCTGCCTGGTAGTGGGGGACAACGTTTCGAAAGGAACGCTAATACCGCATA-  
CGTCCTACGGGAGAAAGCAGGGGACCTTCGGGCCTTGCGCTATCAGATGAGCCTA  
GGTCGGATTAGCTTGTGGTGGGTAATGGCTCACCAAGGCGACGATCCGTAACTG  
GTCTGAGAGGATGATCAGTCACACTGGAAGTGGAGACACGGTCCAGACTCCTACGG  
GAGGCAGCAGTGGGGAATATTGGACAATGGGCGAAAGCCTG-  
ATCCAGCCATGCCGCGTGTGTGAAGAAGGTCTTCGGA-  
TTGTAAAGCACTTTAAGTTGGGAGGAAGGGTTGTAGATTAATACTCTGCAATTTTG-  
ACGTT-ACCGACAGAATAAGCACCGGCTAACTCTGTGCC

>Pseudomonas cremoricolorata NBRC 16634 (NR\_113855)

ATTGAACGCTGGCGGCAGGCCTAACACATGCAAGTCGAGCGGATGAC-  
AGGAGCTTGCTCCTG-GATTCAGCGGCGGACGGGTGAGTAATGCCTAGG-  
AATCTGCCTGGTAGTGGGGGACAACGTTTCGAAAGGAACGCTAATACCGCATA-  
CGTCCTACGGGAGAAAGCAGGGGACCTTCGGGCCTTGCGCTATCAGATGAGCCTA  
GGTCGGATTAGCTTGTGGTGGGTAATGGCTCACCAAGGCGACGATCCGTAACTG  
GTCTGAGAGGATGATCAGTCACACTGGAAGTGGAGACACGGTCCAGACTCCTACGG  
GAGGCAGCAGTGGGGAATATTGGACAATGGGCGAAAGCCTG-  
ATCCAGCCATGCCGCGTGTGTGAAGAAGGTCTTCGGA-

TTGTAAAGCACTTTAAGTTGGGAGGAAGGGTTGTAGATTAATACTCTGCAATTTTG-  
ACGTT-ACCGACAGAATAAGCACCGGCTAACTCTGTGCC

>*Pseudomonas parafulva* AJ 2129 (NR\_040859)

ATTGAACGCTGGCGGCAGGCCTAACACATGCAAGTCGAGCGGATGAC-  
GGGAGCTTGCTCCTT-GATTCAGCGGCGGACGGGTGAGTAATGCCTAGG-  
AATCTGCCTGGTAGTGGGGGACAACGTTTCGAAAGGAACGCTAATACCGCATA-  
CGTCCTACGGGAGAAAGCAGGGGACCTTCGGGCCTTGCGCTATCAGATGAGCCTA  
GGTCGGATTAGCTTGTGGGTGAGGTAATGGCTCACCAAGGCGACGATCCGTAACTG  
GTCTGAGAGGATGATCAGTCACACTGGAAGTGGAGACACGGTCCAGACTCCTACGG  
GAGGCAGCAGTGGGGAATATTGGACAATGGGCGAAAGCCTG-  
ATCCAGCCATGCCGCGTGTGTGAAGAAGGTCTTCGGA-  
TTGTAAAGCACTTTAAGTTGGGAGGAAGGGTTGTAGATTAATACTCTGCAATTTTG-  
ACGTT-ACCGACAGAATAAGCACCGGCTAACTCTGTGCC

>*Pseudomonas fulva* IAM1529 (NR\_115610)

ATTGAACGCTGGCGGCAGGCCTAACACATGCAAGTCGAGCGGATGAC-  
AGGAGCTTGCTCCTG-GATTCAGCGGCGGACGGGTGAGTAATGCCTAGG-  
AATCTGCCTGGTAGTGGGGGACAACGTTTCGAAAGGAACGCTAATACCGCATA-  
CGTCCTACGGGAGAAAGCAGGGGACCTTCGGGCCTTGCGCTATCAGATGAGCCTA  
GGTCGGATTAGCTTGTGGGTGAGGTAATGGCTCACCAAGGCGACGACTGTAACTG  
GTCTGAGAGGATGATCAGTCACACTGGAAGTGGAGACACGGTCCAGACTCCTACGG  
GAGGCAGCAGTGGGGAATATTGGACAATGGGCGAAAGCCTG-  
ATCCAGCCATGCCGCGTGTGTGAAGAAGGTCTTCGGA-  
TTGTAAAGCACTTTAAGTTGGGAGGAAGGGTTGTAGATTAATACTCTGCAATTTTG-  
ACGTT-ACCGACAGAATAAGCACCGGCTAACTCTGTGCC

>*Pseudomonas reinekei* MT1 (NR\_042541)

ATTGAACGCTGGCGGCAGGCCTAACACATGCAAGTCGAGCGGATGAC-  
AGGAGCTTGCTCCTG-AATTCAGCGGCGGACGGGTGAGTAATGCCTAGG-  
AATCTGCCTGGTAGTGGGGGACAACGTTTCGAAAGGAACGCTAATACCGCATA-  
CGTCCTACGGGAGAAAGCAGGGGACCTTCGGGCCTTGCGCTATCAGATGAGCCTA  
GGTCGGATTAGCTAGTTGGGTGAGGTAATGGCTCACCAAGGCGACGATCCGTAACTG  
GTCTGAGAGGATGATCAGTCACACTGGAAGTGGAGACACGGTCCAGACTCCTACGG  
GAGGCAGCAGTGGGGAATATTGGACAATGGGCGAAAGCCTG-  
ATCCAGCCATGCCGCGTGTGTGAAGAAGGTCTTCGGA-  
TTGTAAAGCACTTTAAGTTGGGAGGAAGGGTTGTAGATTAATACTCTGCAATTTTG-  
ACGTT-ACCGACAGAATAAGCACCGGCTAACTCTGTGCC

>*Pseudomonas alcaligenes* ATCC 14909 (NR\_114472)

ATTGAACGCTGGCGGCAGGCCTAACACATGCAAGTCGAGCGGATGAG-  
TGGAGCTTGCTCCAT-GATTCAGCGGCGGACGGGTGAGTAATGCCTAGG-  
AATCTGCCTGGTAGTGGGGGACAACGTTTCGAAAGGAACGCTAATACCGCATA-  
CGTCCTACGGGAGAAAGCAGGGGACCTTCGGGCCTTGCGCTATCAGATGAGCCTA  
GGTCGGATTAGCTAGTTGGGTGAGGTAATGGCTCACCTAGGCGACGATCCGTAACTG  
GTCTGAGAGGATGATCAGTCACACTGGAAGTGGAGACACGGTCCAGACTCCTACGG  
GAGGCAGCAGTGGGGAATATTGGACAATGGGCGAAAGCCTG-  
ATCCAGCCATGCCGCGTGTGTGAAGAAGGTCTTCGGA-  
TTGTAAAGCACTTTAAGTTGGGAGGAAGGGCAGTAAGTTAATACCTTGCTGTTTTG-  
ACGTT-ACCAACAGAATAAGCACCGGCTAACTTCGTGCC

>*Chryseobacterium lactis* KC1864 (NR\_126256)

GATGAACGCTAGCGGGAGGCCTAACACATGCAAGCCGAGCGGTAGAG----  
ATTCTTCGGAATCTTGAGAGCGGCGTACGGGTGCGGAACACGTGTGCAACCTGCCT  
TTATCTGGGGGATAGCCTTTTCGAAAGGAAGATTAATACCCATAATATATTGAATG  
GCATCATTTGATATTGAAAACCTCCGGTGGATAGAGATGGGCACGCGCAAGATTAG

ATAGTTGGTGAGGTAACGGCTCACCAAGTCTACGATCTTTAGGGGGCCTGAGAGGG  
TGATCCCCCACACTGGTACTGAGACACGGACCAGACTCCTACGGGAGGCAGCAGT  
GAGGAATATTGGACAATGGGTGAGAGCCTG-  
ATCCAGCCATCCCGCGTGAAGGACGACGGCCCTATGGGTTGTAAACTTCTTTTGT  
TAGGGATAAACCTACTCTCGTGAGA-----GTAGCTGAAGGT-  
ACTATACGAATAAGCACCGGCTAACTCCGTGCC

>Acinetobacter pittii CIP 70.29 (NR\_116774)

ATTGAACGCTGGCGGCAGGCTTAACACATGCAAGTCGAGCGGAGAGA-  
GGTAGCTTGCTACTG-ATCTTAGCGGCGGACGGGTGAGTAATGCTTAGG-  
AATCTGCCTATTAGTGGGGGACAACATTTGAAAGGAATGCTAATACCGCATA-  
CGTCCTACGGGAGAAAGCAGGGGATCTTCGGACCTTGCCTAATAGATGAGCCTA  
AGTCGGATTAGCTAGTTGGTGGGGTAAAGGCCTACCAAGGCGACGATCTGTAGCG  
GGTCTGAGAGGATGATCCGCCACACTGGGACTGAGACACGGCCCAGACTCCTACG  
GGAGGCAGCAGTGGGGAATATTGGACAATGGGCGCAAGCCTG-  
ATCCAGCCATGCCGCGTGTGTGAAGAAGGCCTTATGG-  
TTGTAAAGCACTTTAAGCGAGGAGGAGGCTACTTTAGTTAATACCTAGAGATAGTG  
GACGTT-ACTCGCAGAATAAGCACCGGCTAACTCTGTGCC

>Beijerinckia fluminensis UQM 1685 (Agrobacterium radiobacter)(NR\_116306)

AACGAACGCTGGCGGCAGGCTTAACACATGCAAGTCGAACG-----  
CCCCGCAAGGGGAGTGGCAGACGGGTGAGTAACGCGTGGG-  
AACATACCCTTTTCTGCGGAATAGCTCCGGGAAACTGGAATTAATACCGCATA-  
CGCCCTACGGGGGAAAG-----  
ATTTATCGGGGAAGGATTGGCCCGCGTTGGATTAGCTAGTTGGTGGGGTAAAGGCC  
TACCAAGGCGACGATCCATAGCTGGTCTGAGAGGATGATCAGCCACATTGGGACT  
GAGACACGGCCCAAACCTCCTACGGGAGGCAGCAGTGGGGAATATTGGACAATGGG  
CGCAAGCCTG-ATCCAGCCATGCCGCGTGAGTGATGAAGGCCTTAGGG-  
TTGTAAAGCTCTTTCACCGGAGAAGA-----TAATG-----ACGGT-  
ATCCGGAGAAGAAGCCCCGGCTAACTTCGTGCC

>Agrobacterium tumefaciens NCPPB2437 (NR\_115516)

AACGAACGCTGGCGGCAGGCTTAACACATGCAAGTCGAACG-----  
CCCCGCAAGGGGAGTGGCAGACGGGTGAGTAACGCGTGGG-  
AACATACCCTTTTCTGCGGAATAGCTCCGGGAAACTGGAATTAATACCGCATA-  
CGCCCTACGGGGGAAAG-----  
ATTTATCGGGGAAGGATTGGCCCGCGTTGGATTAGCTAGTTGGTGGGGTAAAGGCC  
TACCAAGGCGACGATCCATAGCTGGTCTGAGAGGATGATCAGCCACATTGGGACT  
GAGACACGGCCCAAACCTCCTACGGGAGGCAGCAGTGGGGAATATTGGACAATGGG  
CGCAAGCCTG-ATCCAGCCATGCCGCGTGAGTGATGAAGGCCTTAGGG-  
TTGTAAAGCTCTTTCACCGGAGAAGA-----TAATG-----ACGGT-  
ATCCGGAGAAGAAGCCCCGGCTAACTTCGTGCC

>Agrobacterium larrymoorei AF3.10 (NR\_026519)

AACGAACGCTGGCGGCAGGCTTAACACATGCAAGTCGAACG-----  
CATCGCAAGATGAGTGGCAGACGGGTGAGTAACGCGTGGG-  
AACATACCCTTTTCTACGAATAGCTCTGGGAAACTGGAATTAATACCGTATA-  
CGCCCTACGGGGGAAAG-----  
ATTTATCGGGGAAGGATTGGCCCGCGTTGGATTAGCTAGTTGGTGGGGTAAAGGCC  
TACCAAGGCGACGATCCATAGCTGGTCTGAGAGGATGATCAGCCACATTGGGACT  
GAGACACGGCCCAAACCTCCTACGGGAGGCAGCAGTGGGGAATATTGGACAATGGG  
CGCAAGCCTG-ATCCAGCCATGCCGCGTGAGTGATGAAGGCCTTAGGG-  
TTGTAAAGCTCTTTCACCGATGAAGA-----TAATG-----ACGGT-  
AGTCGGAGAAGAAGCCCCGGCTAACTTCGTGCC

>Agrobacterium fabrum C58 (NR\_074266)

AACGAACGCTGGCGGCAGGCTTAACACATGCAAGTCGAACG-----  
CCCCGCAAGGGGAGTGGCAGACGGGTGAGTAACGCGTGGG-  
AATCTACCCATCTCTGCGGAATAGCTCTGGGAACTGGAATTAATACCGCATA-  
CGCCCTACGGGGGAAAG-----  
ATTTATCGGGGATGGATGAGCCCGCGTTGGATTAGCTAGTTGGTGGGGTAAAGGCC  
TACCAAGGCGACGATCCATAGCTGGTCTGAGAGGATGATCAGCCACATTGGGACT  
GAGACACGGCCAACTCCTACGGGAGGCAGCAGTGGGGAATATTGGACAATGGG  
CGCAAGCCTG-ATCCAGCCATGCCGCGTGAGTGATGAAGGCCTTAGGG-  
TTGTAAAGCTCTTTACCGATGAAGA-----TAATG-----ACGGT-  
AGTCGGAGAAGAAGCCCCGGCTAACTTCGTGCC  
>Sphingobium yanoikuyae NBRC 15102 (NR\_113730)  
AACGAACGCTGGCGGCATGCCTAATACATGCAAGTCGAACGAGA-----  
TCTTCGGATCTAGTGGCGCACGGGTGCGTAACGCGTGGG-  
AATCTGCCCTTGGGTTTCGGAATAACTTCTGGAAACGGAAGCTAATACCGGATG-  
ATGACGTAAGTCCAAAG-----  
ATTTATCGCCCAAGGATGAGCCCGCGTAGGATTAGCTAGTTGGTGAGGTAAAGGCT  
CACCAAGGCGACGATCCTTAGCTGGTCTGAGAGGATGATCAGCCACACTGGGACT  
GAGACACGGCCCAGACTCCTACGGGAGGCAGCAGTAGGGAATATTGGACAATGGG  
CGAAAGCCTG-ATCCAGCAATGCCGCGTGAGTGATGAAGGCCTTAGGG-  
TTGTAAAGCTCTTTTACCCGGGATGA-----TAATG-----ACAGT-  
ACCGGGAGAATAAGCTCCGGCTAACTCCGTGCC  
>Sphingobium yanoikuyae GIFU 9882 (NR\_115524)  
AACGAACGCTGGCGGCATGCCTAATACATGCAAGTCGAACGAGA-----  
TCTTCGGATCTAGTGGCGCACGGGTGCGTAACGCGTGGG-  
AATCTGCCCTTGGGTTTCGGAATAACTTCTGGAAACGGAAGCTAATACCGGATG-  
ATGACGTAAGTCCAAAG-----  
ATTTATCGCCCAAGGATGAGCCCGCGTAGGATTAGCTAGTTGGTGAGGTAAAGGCT  
CACCAAGGCGACGATCCTTAGCTGGTCTGAGAGGATGATCAGCCACACTGGGACT  
GAGACACGGCCCAGACTCCTACGGGAGGCAGCAGTAGGGAATATTGGACAATGGG  
CGAAAGCCTG-ATCCAGCAATGCCGCGTGAGTGATGAAGGCCTTAGGG-  
TTGTAAAGCTCTTTTACCCGGGATGA-----TAATG-----ACAGT-  
ACCGGGAGAATAAGCTCCGGCTAACTCCGTGCC  
>Sphingobium yanoikuyae IFO 15102 (NR\_036767)  
AACGAACGCTGGCGGCATGCCTAATACATGCAAGTCGAACGAGA-----  
TCTTCGGATCGAGTGGCCACGGGTGCGTAACGCGTGGG-  
AATCTGCCCTTGGGTTTCGGAATAACTTCTGGAAACGGAAGCTAATACCGGATG-  
ATGACGTAGGTCCAAAG-----  
ATTTATCGCCCAAGGATGAGCCCGCGTAGGATTAGCTAGTTGGTGAGGTAAAGGCT  
CACCAAGGCGACGATCCTTAGCTGGTCTGAGAGGATGATCAGCCACACTGGGACT  
GAGACACGGCCCAGACTCCTACGGGAGGCAGCAGTGGGGAATATTGGACAATGGG  
CGAAAGCCTG-ATCCAGCAATGCCGCGTGAGTGATGAAGGCCTTAGGG-  
TTGTAAAGCTCTTTTACCCGGGATGA-----TAATG-----ACAGT-  
ACCGGGAGAATAAGCTCCGGCTAACTCCGTGCC  
>Sphingobium cloacae NBRC 102517 (NR\_114135)  
AACGAACGCTGGCGGCATGCCTAATACATGCAAGTCGAACGAGA-----  
TCTTCGGATCTAGTGGCGCACGGGTGCGTAACGCGTGGG-  
AATCTGCCCTTGGGTTTCGGAATAACATCGGGAACTGATGCTAATACCGGATG-  
ATGACGAAAGTCCAAAG-----  
ATTTATCGCCCAGGGATGAGCCCGCGTAGGATTAGCTAGTTGGTGGGGTAAAGGCT  
CACCAAGGCGACGATCCTTAGCTGGTCTGAGAGGATGATCAGCCACACTGGGACT  
GAGACACGGCCCAGACTCCTACGGGAGGCAGCAGTAGGGAATATTGGACAATGGG

GGCAACCCTG-ATCCAGCAATGCCGCGTGAGTGATGAAGGCCTTAGGG-  
TTGTAAAGCTCTTTTACCCGGGATGA-----TAATG-----ACAGT-  
ACCGGGAGAATAAGCTCCGGCTAACTCCGTGCC

>*Sphingobium herbicidovorans* NBRC 16415 (NR\_113843)

AACGAACGCTGGCGGCATGCCTAATACATGCAAGTCGAACGAGA-----  
TCTTCGGATCTAGTGGCGCACGGGTGCGTAACGCGTGGG-  
AATCTGCCCTTGGGTTTCGGAATAACAGTTGGAAACGACTGCTAATACCGGATG-  
ATGACGTAAGTCCAAAG-----

ATTTATCGCCCAAGGATGAGCCCGCGTAGGATTAGCTAGTTGGTGAGGTAAAGGCT  
CACCAAGGCTACGATCCTTAGCTGGTCTGAGAGGATGATCAGCCACACTGGGACTG  
AGACACGGCCCAGACTCCTACGGGAGGCAGCAGTAGGGAATATTGGACAATGGGC  
GAAAGCCTG-ATCCAGCAATGCCGCGTGAGTGATGAAGGCCTTAGGG-  
TTGTAAAGCTCTTTTACCCGGGATGA-----TAATG-----ACAGT-  
ACCGGGAGAATAAGCCCCGGCTAACTCCGTGCC

>*Sphingobium ummariense* RL-3 (NR\_044171)

AACGAACGCTGGCGGCATGCCTAATACATGCAAGTCGAACGAAG-----  
GCTTCGGCCTTAGTGGCGCACGGGTGCGTAACGCGTGGG-  
AATCTGCCCTTGGGTTTCGGAATAACGTCTGGAAACGGACGCTAATACCGGATG-  
ATGACGTAAGTCCAAAG-----

ATTTATCGCCCAGGGATGAGCCCGCGTAGGATTAGCTAGTTGGTGAGGTAAAGGCT  
CACCAAGGCGACGATCCTTAGCTGGTCTGAGAGGATGATCAGCCACACTGGGACT  
GAGACACGGCCCAGACTCCTACGGGAGGCAGCAGTAGGGAATATTGGACAATGGG  
CGAAAGCCTG-ATCCAGCAATGCCGCGTGAGTGATGAAGGCCTTAGGG-  
TTGTAAAGCTCTTTTACCCGGGATGA-----TAATG-----ACAGT-  
ACCGGGAGAATAAGCCCCGGCTAACTCCGTGCC
